# Diatom Centromeres Suggest a Novel Mechanism for Nuclear Gene Acquisition

Running Title: Diatom Centromeres and Nuclear Gene Acquisition

Rachel E. Diner<sup>1,2</sup>, Chari M. Noddings<sup>3</sup>, Nathan C. Lian<sup>3</sup>, Anthony K. Kang<sup>3</sup>, Jeffrey B. McQuaid<sup>1,2</sup>, Jelena Jablanovic<sup>2</sup>, Josh L. Espinoza<sup>2</sup>, Ngocquynh A. Nguyen<sup>3</sup>, Miguel A. Anzelmatti, Jr.<sup>2</sup>, Jakob Jansson<sup>3</sup>, Vincent A. Bielinski<sup>3</sup>, Bogumil J. Karas<sup>3±</sup>, Christopher L. Dupont<sup>2</sup>, Andrew E. Allen<sup>1,2</sup>, Philip D. Weyman<sup>3\*</sup>

Affiliations:

<sup>1</sup> Integrative Oceanography Division, Scripps Institution of Oceanography, University of California San Diego, La Jolla, California 92037, USA

<sup>2</sup> Microbial and Environmental Genomics Group, J. Craig Venter Institute, La Jolla, California 92037, USA

<sup>3</sup> Synthetic Biology and Bioenergy Group, J. Craig Venter Institute, La Jolla, California 92037, USA

± Present address: Designer Microbes Inc. London, Ontario, N6G4X8, Canada

\* Correspondence: Philip D. Weyman, [pweyman@jcvl.org](mailto:pweyman@jcvl.org)

## Abstract:

Centromeres are essential for cell division and growth in all eukaryotes, and knowledge of their sequence and structure guides the development of artificial chromosomes for functional cellular biology studies. Centromeric proteins are conserved among eukaryotes; however, centromeric DNA sequences are highly variable. We combined forward and reverse genetic approaches with chromatin immunoprecipitation to identify centromeres of the model diatom *Phaeodactylum tricornutum*. Diatom centromere sequences contain low GC content regions and an abundance of long contiguous AT windows, but lack repeats or other conserved sequence features. Native and foreign sequences of similar GC content can maintain episomes and recruit the diatom centromeric histone protein CENP-A, suggesting non-native sequences can also function as diatom centromeres. Thus, simple sequence requirements enable DNA from foreign sources to incorporate into the nuclear genome repertoire as stable extra-chromosomal episomes, revealing a potential mechanism for bacterial and foreign eukaryotic DNA acquisition.

**Keywords:** Diatom, *Phaeodactylum tricornutum*, centromere, CENP-A, episome

## 1. Introduction

Centromeres play a crucial role in the cellular biology of eukaryotes by acting as a genomic site for kinetochore formation and facilitating effective transmission of replicated nuclear DNA to new cells. Centromere associated proteins are functionally conserved among eukaryote species (Cheeseman and Desai, 2008; Pluta et al., 1995; Westermann et al., 2003). Nearly all eukaryotes studied to date possess a version of a specialized centromeric histone protein known as centromere protein A (CENP-A, also described as CENH3), which binds to centromeric DNA and replaces the histone H3 at the site of kinetochore assembly (Earnshaw et

47 al., 2013; McKinley and Cheeseman, 2016; Westhorpe et al., 2014). Conversely, the centromeric  
48 DNA sequences themselves are extremely variable and appear to evolve rapidly, even among  
49 similar organisms (Henikoff et al., 2001).

50 There are 3 general types of eukaryotic centromeres: point centromeres, holocentromeres,  
51 and regional centromeres. Point centromeres are uniquely characterized by specific conserved  
52 DNA sequences, and are found in limited fungal species including the budding yeast  
53 *Saccharomyces cerevisiae* and close relatives (Cleveland et al., 2003; Cottarel et al., 1989; Smith  
54 et al., 2012). In holocentromeric organisms, the kinetochore forms along the entire length of each  
55 chromosome; a notable example is the model organism *C. elegans* (Albertson and Thomson,  
56 1982). Most eukaryotes have regional centromeres, which are commonly found as a single large  
57 DNA region on each chromosome (Reviewed in Sullivan et al., 2001 and Torras-Llort et al.,  
58 2009). Regional centromeres are variable in length and sequence even among closely related  
59 species; however, there are often predictable genetic features. For example, human centromeres  
60 contain large stretches of repetitive satellite DNA, ranging in size from hundreds of kilobases to  
61 megabases (Sullivan et al., 2001; Tyler-Smith et al., 1993; Willard, 1998). Centromeres of  
62 several plants and the insect model *Drosophila melanogaster* contain large arrays of satellite  
63 repeats interspersed with or adjacent to retrotransposons, which can vary substantially in copy  
64 number and organization (Ma et al., 2007). A common feature of many eukaryotic centromeric  
65 DNA is low GC content. Centromeres of *Schizosaccharomyces pombe* and other yeast species  
66 feature an unconserved core of AT-rich DNA sequence often surrounded inverted repeats  
67 (Clarke et al., 1986; Kapoor et al., 2015; Lynch et al., 2010; Nakaseko et al., 1986). The  
68 centromeres of the protist *Plasmodium* have no apparent sequence similarity besides being 2-4-  
69 kb regions of extremely low GC content (<3%)(Bowman et al., 1999; Iwanaga et al., 2010).  
70 Likewise, centromere regions of the red algal species *Cyanidioschyzon merolae* contain 2-3-kb  
71 of relatively low GC content but manifest no other apparent pattern (Kanesaki et al., 2015;  
72 Maruyama et al., 2008).

73 Centromere identification can also be useful for synthetic biology, enabling further  
74 discoveries and biotechnology applications. Artificial chromosomes provide a stable platform for  
75 introduction and maintenance of multigene constructs necessary for expression of biosynthetic  
76 pathways and large complex proteins (Coudreuse, 2009; Kouprina et al., 2014; Monaco and  
77 Larin, 1994; Yu et al., 2016). The experimental identification of eukaryotic centromeres has been  
78 extremely useful for developing molecular biology tools, particularly in the creation of artificial  
79 chromosomes. Circular and/or linear artificial chromosomes based on native centromeres, origins  
80 of replication, and in some cases telomeres have been developed for yeast (Murray and Szostak,  
81 1983), mammalian cells including human cell lines (Harrington et al., 1997), plants (reviewed in  
82 Liu et al., 2013), and recently the protist *Plasmodium* (Iwanaga et al., 2012). Despite the great  
83 potential for eukaryotic algae in biotechnology, very little is known about algal centromeres and  
84 few resources are available to control gene expression from introduced autonomously replicating  
85 genetic constructs. In 1984, autonomously replicating plasmids utilizing chloroplast DNA were  
86 described for the green alga *Chlamydomonas reinhardtii* (Rochaix et al., 1984). However, these  
87 vectors were not maintained stably and have not been commonly used. More recently,  
88 centromeres have been identified and characterized in the red alga *Cyanidioschyzon merolae*  
89 (Kanesaki et al., 2015; Maruyama et al., 2008), where each of the 20 chromosomes were found  
90 to contain one distinct region recruiting CENP-A. However, to our knowledge, these sequences  
91 have not yet been utilized for the construction of artificial chromosomes.

92 Identifying centromere composition and optimizing artificial chromosome construction  
93 would be particularly valuable for diatoms, which are an abundant group of eukaryotic  
94 phytoplankton with important ecological significance. Diatom research has facilitated major  
95 discoveries in algal physiology and genetics, and several species have been cultivated and  
96 genetically manipulated for the development of valuable bioproducts (Bozarth et al., 2009; Fu et  
97 al., 2015; Lopez et al., 2005). In our previous work, we discovered that a region of *S. cerevisiae*  
98 DNA containing low GC content enabled the stable maintenance of autonomously replicating  
99 episomes in diatoms (Diner et al., 2016; Karas et al., 2015). The DNA was introduced into the  
100 diatoms *Phaeodactylum tricornutum* and *Thalassiosira pseudonana* by bacterial conjugation,  
101 also suggesting a previously unexplored mechanism for horizontal gene transfer from bacteria.  
102 Diatom nuclear genomes contain large amounts of DNA derived from non-nuclear sources,  
103 including foreign sequences such as bacteria and viruses, and prokaryotic and eukaryotic DNA  
104 obtained from endosymbiotic events (e.g., mitochondria, chloroplasts, and additional secondary  
105 endosymbioses) (Armbrust, 2009; Armbrust et al., 2004; Bowler et al., 2008; Timmis et al.,  
106 2004). This genetic complexity and rapid evolution contributes to the ecological success of  
107 diatoms. Thus, elucidating mechanisms that may facilitate nuclear gene acquisition and episomal  
108 maintenance will advance our knowledge of diatom evolution and enable biotechnological  
109 innovation.

110 Here, we identify centromeric regions of diatom chromosomes using forward and reverse  
111 genetics approaches, and observe that diatom centromeres are characterized by a simple low-GC  
112 signal which is also found in the previously described synthetic diatom episomes (Diner et al.,  
113 2016; Karas et al., 2015). Furthermore, we show that non-nuclear diatom DNA and foreign DNA  
114 from a variety of sources with similarly low-GC content can mimic a diatom centromere,  
115 suggesting a permissive mechanism for nuclear gene acquisition. We conclude with a model  
116 suggesting that the frequency of contiguous A+T regions is important in addition to having a  
117 small region with average GC of  $<\sim 33\%$ . This study significantly advances the understanding of  
118 diatom genomic features, facilitates the development of diatom molecular tools, and suggests a  
119 new mechanism for diatom acquisition of foreign genetic material.

120

## 121 **Results**

### 122 **Identification of putative diatom centromeres in *Phaeodactylum tricornutum* chromosomes** 123 **25 and 26**

124 We hypothesized that a centromeric region of a diatom chromosome would support  
125 maintenance of a nuclear episome, as this is a useful experimental method of confirming  
126 centromere function for other organisms (Clarke and Carbon, 1980; Iwanaga et al., 2012). To  
127 identify a diatom centromeric region we first examined the shortest *P. tricornutum* chromosomes  
128 with telomere-to-telomere assembly (25 and 26, (Bowler et al., 2008)), which were each  
129 previously cloned as five overlapping  $\sim 100$  kb DNA fragments (Karas et al., 2013). In our prior  
130 studies (Diner et al., 2016; Karas et al., 2015), sequences supporting episome maintenance in *P.*  
131 *tricornutum* were characterized by improved ex-conjugant colony yield compared to plasmids  
132 incapable of episome maintenance. Thus, we predicted 100-kb fragments from a single *P.*  
133 *tricornutum* chromosome that supported episome maintenance would yield similarly increased  
134 colony numbers in our standard conjugation assay. Out of the 5 large fragments spanning each  
135 chromosome, one fragment from each chromosome produced increased ex-conjugant diatom  
136 colonies: plasmid Pt25-100kb-1 (containing the 1<sup>st</sup> 100-kb fragment of Chromosome 25) (Figure  
137 1A, 1C) and plasmid Pt26-100kb-5 (containing the 5<sup>th</sup> fragment of chromosome 26) (Figure 1B,

138 1D). The Pt25-1 plasmid resulted in 14-32-fold more colonies than plasmids containing other  
139 100-kb fragments from chromosome 25 (Figure 1A, 1C), and plasmid Pt26-5 resulted in 26-100-  
140 fold higher colony numbers than other chromosome 26 fragments (Figure 1B, 1D).

141 Both Pt25-100kb-1 and Pt26-100kb-5 fragments encompass regions of low GC content.  
142 We calculated the GC content of the genome in 100-bp windows overlapping by 50-bp, and  
143 found that windows with the lowest GC content were found on fragments enabling episome  
144 maintenance (Figure 1E, 1F). When calculating GC percentage with larger window sizes (10-kb  
145 to 0.5-kb), an obvious dip in GC content was not apparent on chromosomes 25 and 26  
146 (Supplementary Figure 1); this was also true for the other chromosomal scaffolds (data not  
147 shown). We quantified the number of 100-bp windows less than or equal to 32% GC within a 3-  
148 kb larger window, and observed clear peaks for chromosomes 25 and 26 (Figure 1G, 1H).

149 To clarify whether these specific chromosomal regions enriched in low GC content  
150 enabled episome maintenance, three 10-kb DNA subsequences of Pt25-100kb-1 were cloned into  
151 plasmids otherwise incapable of maintenance (pPtPBR2, Diner et al., 2016): 1 sequence  
152 encompassing the bioinformatically identified low GC region (Pt25-10kb-12) (Figure 1E), and 2  
153 other randomly selected sequences (Pt25-10kb-6 and Pt25-10kb-9) (Supplementary Figure 2).  
154 Pt25-10kb-12 conjugation led to 85-fold more colonies than the negative control, while the other  
155 plasmids showed no increase (Supplementary Figure 2). We further tested the low GC region  
156 found on Pt25-10kb-12 by assembling a 1-kb sub-region containing the lowest GC content  
157 region of chromosome 25 into pPtPBR2. This plasmid, Pt25-1kb, yielded 27-fold more colonies  
158 than the empty vector control (Supplementary Figure 2). Another plasmid containing the 1-kb  
159 region encompassing the lowest GC content region of chromosome 26, Pt26-1kb, resulted in 68-  
160 fold more colonies than the empty vector control. Thus, for chromosomes 25 and 26, regions  
161 containing the lowest GC content were the only regions supporting episome maintenance. To  
162 confirm that these plasmids were maintained in the diatoms over extended periods of time, two  
163 clones of Pt25-1kb were passaged for 30 days without selection. Antibiotic resistant colonies  
164 were recovered at percentages similar to prior studies (Supplementary Table 1) (Diner et al.,  
165 2016; Karas et al., 2015), and plasmids were recovered after the passaging period, demonstrating  
166 the stable maintenance of episomes in these lines (i.e., not integrated into genomic DNA).

167

## 168 **Identification of diatom centromeres using ChIP-seq and reverse and forward genetics**

169 *P. tricornutum* genomic DNA sequences enabled episome maintenance in the diatom,  
170 suggesting these regions were functioning as centromeres. Nearly all eukaryotes previously  
171 studied incorporate the centromeric histone CENP-A (CENH3) into centromeric nucleosomes,  
172 and we tested this in *P. tricornutum* to confirm centromere functionality. We constructed an  
173 episome containing the *CEN6-ARSH4-HIS3* maintenance sequence and a translational fusion of  
174 *P. tricornutum* CENP-A and yellow fluorescent protein (YFP) regulated by a *P. tricornutum*  
175 promoter and terminator. After transfer to *P. tricornutum* using bacterial conjugation (see  
176 Materials and Methods), we performed chromatin immunoprecipitation (ChIP) assays on ex-  
177 conjugant lines using GFP epitope antisera, followed by high-throughput DNA sequencing to  
178 identify all sequences *P. tricornutum* genome sequences that recruit the centromeric histone.

179 ChIP-seq analysis revealed 25 regions that were enriched for sequence reads (peaks)  
180 among the previously reported 33 nuclear chromosome scaffolds (Bowler et al., 2008) (Figure 3,  
181 Supplementary Figure 3). Of the 12 chromosome scaffolds with telomere-to-telomere assembly,  
182 all but one (chromosome 11) had ChIP-seq peaks, including chromosomes 25 and 26. Two  
183 regions recruiting CENP-A were also found within the non-scaffold assemblies (“bottom



184 drawer” sequences)(Obtained from the JGI *P. tricornutum* genome website:  
185 <http://genome.jgi.doe.gov/Phatr2/Phatr2.home.html>) (Supplementary Figure 3). A ChIP-seq peak  
186 was also identified within the *S. cerevisiae* *CEN6-ARSH4-HIS3* region on the episome used to  
187 express the YFP-CENP-A fusion protein (Figure 3). No mitochondrial or chloroplast sequences  
188 recruited CENP-A, which was expected as these genomes do not contain nucleosomes. Most  
189 ChIP-seq peaks on a genome-wide scale co-localized with the presence of at least ten 100-bp  
190 windows with GC content less than or equal to 32% GC in a larger 3-kb region (Supplementary  
191 Figure 3).

192 To verify the ChIP-seq data, we conducted ChIP-qPCR on two regions with ChIP-seq  
193 peaks, one in the genome (Pt25-1kb) and one in the episome (*ARSH4*), and a region of genomic  
194 and episomal DNA without ChIP-seq peaks as a control (See materials and methods)  
195 (Supplementary Figure 4A, 4B). DNA from the low-GC *ARSH4* episomal region was in greater  
196 abundance by >50-70-fold compared to the negative control (Supplementary Figure 4C, 4D, 4E).  
197 Similarly, the Pt25-1kb region was enriched >200-500-fold compared to the genomic DNA  
198 negative control (Supplementary Figure 4C, 4D, 4E). Thus, ChIP-qPCR confirmed the ChIP-seq  
199 results for the CENP-A enriched regions of both episomal and native *P. tricornutum*  
200 chromosomal targets.

201 Of the 25 chromosome scaffolds with ChIP-seq hits, 23 had only one associated ChIP-seq  
202 peak that was between 2.4-5.6 kb (Figure 3, Supplementary Figure 3). Chromosomes 2 and 8  
203 each had two adjacent ChIP-seq peaks (Figure 3). Both putative centromeres on chromosome 2  
204 (2a and 2b) are contained within a larger direct repeat and separated by a sequencing gap  
205 (indicated by Ns in the *P. tricornutum* genome sequence) (Figure 3). These sequences were  
206 highly similar to each other, with ~2.9 kb aligning along the 3.4 kb sequence at >99% sequence  
207 identity. The 2 putative centromeres on chromosome 8 (8a and 8b, respectively) are each  
208 partially contained within long direct repeats at the 3' end of the centromere. The 5' end of 8b is  
209 adjacent to a region of unknown sequence (Figure 3). The 8a and 8b centromere sequences were  
210 also highly similar, with alignment across about half of the centromere sequence at 96.5 %  
211 identity.

212 Apart from these potentially tandem centromere cases, most *P. tricornutum* centromeres  
213 were unique, having no similarity to other centromere sequences, with two exceptions. Predicted  
214 centromeres from chromosomes 24 and 29 shared 99.2% sequence identity over the entire 2.4 kb  
215 region and differed by only 14 mismatches. Additionally, the centromere from chromosome 30  
216 shared a 1.6 kb region of high identity (97%) to a bottom drawer sequence bd23x34, which was  
217 one of the 2 bottom drawer sequences with an associated ChIP-seq hit. Centromeres in *P.*  
218 *tricornutum* were mostly located in intergenic spaces (Figure 3). Direct repeats were detected in  
219 approximately one-third of the centromeres, but the repeat number was low (usually a single  
220 sequence found twice) and the repeat period was variable and small (16-400 bp) (Supplementary  
221 Table 2). Genomic coordinates of all predicted centromeres, including ChIP-seq read regions and  
222 bioinformatically predicted regions containing low GC content are noted in Supplementary Table  
223 3.

224 We used forward genetics to test whether sequences in the *P. tricornutum* genome  
225 including and in addition to those identified by ChIP-seq could support episomal maintenance.  
226 We prepared a *P. tricornutum* genomic library with 2-5 kb inserts using a non-episome vector  
227 (pPtPBR2) and conjugated the library into *P. tricornutum* cells. Episomes were identified by  
228 extracting plasmids from antibiotic resistant *P. tricornutum* colonies and transforming *E. coli*;  
229 only DNA maintained as circular episomes in *P. tricornutum* was expected to yield *E. coli*

230 colonies. We amplified and sequenced *P. tricornutum* genomic library inserts from *E. coli*  
231 colonies and identified 35 unique insert sequences from 99 recovered plasmids (Supplementary  
232 Table 4). Of these 35 unique insert sequences, 10 mapped to the nuclear genome chromosomal  
233 scaffolds and 1 mapped to the un-scaffold “bottom drawer” assemblies. Eighteen sequences  
234 mapped to the chloroplast genome and 6 mapped to the mitochondrial genome.

235 Reverse genetics was used to functionally test whether the sequences identified by ChIP-  
236 seq and the *P. tricornutum* forward genetics library could maintain episomes. Forty sequences,  
237 including all ChIP-seq peaks, potential ChIP-seq artifacts, and *P. tricornutum* forward genetic  
238 library sequences including selected mitochondrial and chloroplast DNA sequences were cloned  
239 into the non-episomal plasmid pPtPBR2 (See materials and methods). Most plasmids containing  
240 ChIP-seq identified sequences resulted in 7-162-fold more diatom ex-conjugant colonies than the  
241 pPtPBR2 negative control (Supplementary Figure 5). We also tested random regions of  
242 chromosome 1 as negative controls (Test-37, -38, and -39) and regions suspected to be ChIP-seq  
243 mapping artifacts based on high read counts in both input and anti-YFP immunoprecipitation  
244 treatments (Test-4, -10, and -16). Both classes of sequences were unable to support episome  
245 maintenance; ex-conjugant numbers were similar to the negative control and much lower than  
246 the positive control pPtPBR1 (Supplementary Figure 5). Ex-conjugant colony numbers following  
247 conjugation with the pPtPBR1 positive control (containing *CEN6-ARSH4-HIS3*) were not  
248 notably different from the episomes containing putative *P. tricornutum* centromeres. One insert  
249 sequence from chromosome 11 contained a region of GC content similar to, but slightly higher  
250 than, the centromeres (Test 40). However, this region contained no ChIP-seq peak and was  
251 unable to maintain an episome (Supplementary Figure 5).

252 We also tested the *P. tricornutum* regions recovered from the forward genetic screen for  
253 the ability to maintain episomes. All chloroplast and mitochondrial DNA sequences, the  
254 “bottom drawer” sequence, and 8 of the 10 nuclear genome sequences contained low GC content  
255 of 28-41% (Supplementary Table 4) across the entire insert region. These 8 nuclear genome  
256 sequences and the “bottom drawer” sequence mapped to identical regions as the ChIP-seq peaks  
257 (Supplementary Figure 3). The two remaining inserts (Test 18 and Test 20) from the nuclear  
258 genome had GC content typical of the *P. tricornutum* nuclear genomic DNA (47%), and did not  
259 map to a ChIP-seq peak (Supplemental Table 3). We re-tested whether the two high GC nuclear  
260 genome inserts as well as two sequences each from the chloroplast (Test 33 and Test 34) and the  
261 mitochondrion (Test 35 and Test 36) could support episome maintenance. Both mitochondrial  
262 and both chloroplast sequences supported episomes (Supplementary Table 4); however, the high  
263 GC nuclear sequences did not, and we predict that their appearance in the library was likely due  
264 to plasmid carry-over from the initial conjugation (Supplementary Table 4)

265

### 266 **Foreign DNA sequences examined for episome maintenance**

267 Since the *CEN6-ARSH4-HIS3* sequence from *S. cerevisiae* supported episome  
268 maintenance in *P. tricornutum*, we hypothesized that other foreign DNA sequences with  
269 similarly low GC composition could as well. Deletion analysis of the *CEN6-ARSH4-HIS3* region  
270 previously revealed that low GC regions of >~500 bp enabled maintenance. To test this pattern  
271 in the present study, we examined 24 sequences from *Mycoplasma mycoides* JCVI Syn1.0  
272 (NCBI accession #CP002027) of various sizes (0.5-1 kb) and GC content (15-50%) for their  
273 ability to maintain diatom episomes. All sequences of less than 28% GC content regardless of the  
274 size resulted in high numbers of ex-conjugant colonies consistent with episome maintenance  
275 (Figure 4). Most sequences of 28% and 30% GC also resulted in large numbers of *P. tricornutum*

276 ex-conjugant colonies with two exceptions that produced colony numbers similar to the negative  
277 control: a 500-bp 28% GC fragment (1.3 fold below control), and a 500-bp 30% GC fragment  
278 (1.2 fold above control) (Figure 4). Additionally, one 700-bp 30% GC fragment produced only  
279 3.3-fold more colonies than the control, a relatively low colony increase. The fragments  
280 containing either 40% or 50% GC content sequences produced ex-conjugant colony numbers  
281 similar to the negative control. Thus, with a few exceptions (discussed below), DNA sequences  
282 of ~30% GC or lower were required and sufficient to support *P. tricornutum* episomes.

283 The above results suggest that many sequences of at least 500-bp (the smallest fragment  
284 tested) of low GC DNA could maintain an episome in *P. tricornutum*, including sequences with  
285 environmental relevance. We examined whether a marine bacterial conjugative plasmid could  
286 support episome maintenance by searching the *Alteromonas macleodii* conjugative plasmid  
287 pAMDE1 for low GC content regions (Figure 5A). We then identified and cloned two 500-bp  
288 regions, AM-1 and AM-2, with 26.2% and 28.8% GC, respectively; conjugation of plasmids  
289 containing either region yielded 6-17-fold more ex-conjugant *P. tricornutum* colonies than the  
290 pPtPBR2 negative control with no maintenance sequence elements (Figure 5A). We also tested  
291 whether regions of plasmids previously isolated from the diatom *Cylindrotheca fusiformis*  
292 (Hildebrand et al., 1992; Jacobs et al., 1992) could support episomes in *P. tricornutum*. Two  
293 plasmids, pCF1 and pCF2, containing low GC, 560-bp regions (28.9 % and 28.4 % GC,  
294 respectively) were constructed (see materials and methods) and each yielded 7-12-fold more *P.*  
295 *tricornutum* ex-conjugant colonies than the pPtPBR2 negative control (Figure 5).

296 We examined maintenance properties of episomes supported by foreign DNA sequences.  
297 *P. tricornutum* lines containing plasmids with two different *Mycoplasma* inserts (Myco-15-  
298 500bp-2 and Myco-21-500bp-2) were examined for episomal maintenance in the absence of  
299 antibiotic selection. After 30 days of serial passage without antibiotic, between 45% and 75% of  
300 cells maintained the episome, similar to maintenance of episomes containing the *CEN6-ARSH4-*  
301 *HIS3* sequence (Diner et al., 2016; Karas et al., 2015) and the native *P. tricornutum* centromere  
302 sequence from chromosome 25 (Supplementary Table 1). We also tested maintenance of the *A.*  
303 *macleodii* and *C. fusiformis* sequences, and with the exception of colony 8 of the AM-2 plasmid,  
304 all episomes were maintained in the absence of antibiotic selection with retention rates between  
305 24-84%, similar to previous reports (Diner et al., 2016; Karas et al., 2015). In colony 8  
306 containing the AM-2 episome, only 3% of cells retained the episome after 30 days of serial  
307 passage without antibiotic. For all clones, as well as all other experiments where conjugations  
308 resulted in a high number of ex-conjugant diatom colonies relative to the negative control,  
309 episomes were successfully recovered in *E. coli*, confirming their stable extra-chromosomal  
310 maintenance. Thus, foreign low GC DNA sequences support episomal maintenance in a manner  
311 similar to native *P. tricornutum* centromeric sequences in the absence of antibiotic selection.

### 312 313 **Bioinformatic analysis of episome-supporting sequences**

314 A common theme among sequences supporting episome maintenance regardless of  
315 source was their low GC content. ChIP-seq and forward genetic screening identified sequences  
316 longer than the minimal length required for episome maintenance; our results indicate that 500-  
317 bp sequences can maintain episomes. Thus, we searched within these sequences for the 500-bp  
318 sub-region with the lowest GC content (Supplementary Table 5). When viewed together based  
319 on ability to maintain an episome, all inserts from the native diatom “Test” series and all foreign  
320 DNA inserts examined (including *M. mycoides*, *C. fusiformis*, and *A. macleodii* plasmid  
321 pAMDE1 source DNA) indicated a clear pattern of low GC content supporting episome

322 maintenance regardless of whether the source was foreign or native (Figure 6). However, three  
323 *M. mycoides* DNA sequences (28-500-2, 30-500-2, and 30-700-2) that were predicted to be  
324 maintained based on low average GC content produced low numbers of ex-conjugant colonies  
325 after conjugation. DNA sequencing confirmed the identity of the non-functioning *Mycoplasma*  
326 inserts and other critical plasmid features (data not shown).

327 Because these sequences were predicted to support episome maintenance based on  
328 average GC content, their failure to maintain episomes suggested that an additional signal  
329 besides average GC is required. Because native *P. tricornutum* centromeres do not have repeats  
330 or other structures and attempts to identify a conserved sequence motif using BLAST (Altschul  
331 et al., 1990) and MEME (Bailey et al., 2009) were unsuccessful, we examined k-mer usage to  
332 determine if very short sequences were over-represented in DNA fragments supporting  
333 episomes. We chose a k-mer length of 6 because it was the longest string that could still be well-  
334 represented in a sequence of 500-bp. We identified unique 6-mers over-represented in native *P.*  
335 *tricornutum* centromeres by requiring their retention to be statistically significant ( $P < 0.001$ )  
336 when compared to randomly-selected *P. tricornutum* genomic sequence (47% GC) and randomly  
337 generated sequences of 47% GC. Because the overall GC content is lower for centromeric ChIP-  
338 seq peaks (39% GC average) compared to the genomic regions (47% GC), we also required the  
339 6-mers to be significantly over-represented in the centromeres relative to a randomly generated  
340 set of 39% GC sequences. This allowed us to identify 6-mers over-represented in the *P.*  
341 *tricornutum* centromeres that were unexplained by GC content difference from the genomic  
342 DNA (Supplementary Table 6). We then examined the recruitment of this set of centromere-  
343 enriched 6-mers in two sets of *Mycoplasma* fragments. One set contained the two 28% GC  
344 sequences and one 30% GC sequence that did not support episome maintenance despite having a  
345 sufficiently low average GC content (“Myco-No” set). The second set comprised the remaining 9  
346 *Mycoplasma* sequences with 28% and 30% average GC that successfully supported episome  
347 maintenance (“Myco-Yes” set). Unique 6-mers that were over-represented in the Myco-Yes set  
348 were characterized by very low GC content (i.e., the most abundant 6-mers in the “Myco-Yes”  
349 set were composed entirely of A+T bases) (Figure 7). When examining the number of  
350 consecutive A+T nucleotides in the *Mycoplasma* sequences that supported episome maintenance  
351 compared to those that did not, stretches of 6 or more consecutive A+T bases were more frequent  
352 in the *Mycoplasma* fragments that supported episome maintenance (i.e., “Myco-Yes”,  
353 Supplementary Table 7). The lower distribution of consecutive A+T bases in the “Myco-No” set  
354 was also observed when compared to a set of randomly generated sequences of 30% GC  
355 (Supplementary Table 7). Thus, the “Myco-No” samples that failed to support episome  
356 maintenance appear to have fewer long stretches composed of A+T residues despite having the  
357 same average GC content as fragments that supported episome maintenance in *P. tricornutum*.  
358 This observation is a valuable advancement in understanding the minimal sequence requirements  
359 for diatom centromeres and episomal maintenance.

360

## 361 **Discussion**

### 362 **Features of predicted diatom centromeres**

363 In this study, we identified native diatom centromere sequences with high resolution.  
364 Based on previous studies, we hypothesized that low GC content would be a common  
365 characteristic of diatom centromeres. We deconstructed two *Phaeodactylum tricornutum*  
366 chromosomes (25 and 26) and found that regions with low GC content appeared to function as  
367 centromeres, while adjacent regions did not. We subsequently conducted a genome-wide ChIP-



368 seq screen (confirmed with ChIP-qPCR) and a forward genetics screen to identify centromeres  
369 and additional sequences enabling episome maintenance, and used reverse genetics to test for  
370 function. We discovered 25 unique *P. tricornutum* centromeric DNA sequences: 24 among the  
371 nuclear genome scaffolds and 1 in the non-scaffolded genome assemblies. If our results indicate  
372 a true estimate of diatom chromosomes, with one unique centromere sequence each, we would  
373 predict that the diatom genome contains fewer chromosomes than the 33 predicted previously  
374 (Bowler et al., 2008). Centromere sequences may be erroneously missing from the genome  
375 assembly. Additionally, some of the *P. tricornutum* chromosome-scale scaffolds lacking  
376 telomere-to-telomere assembly may not be individual chromosomes, but rather partial  
377 chromosomes. For example, the putative centromeres identified by ChIP-seq from chromosomes  
378 24 and 29 were nearly identical (99%), and each of these two centromeres was positioned near a  
379 scaffold terminus lacking a telomere. Thus, chromosome-scale scaffolds 24 and 29 may be two  
380 arms of a single chromosome. In any case, the identification of centromeric DNA sequences will  
381 help to develop a better model of *P. tricornutum* genome organization. Another possibility is that  
382 the chromosomes not identified by our ChIP-seq analysis do not recruit CENP-A and may  
383 employ different mechanisms to assemble the kinetochore; however, this seems unlikely, as  
384 previously studied organisms tend to have conserved epigenetic features (i.e., CENP-A  
385 recruitment) for centromeres across all chromosomes.

386 Two *P. tricornutum* chromosomes, 2 and 8, appeared to deviate from the monocentric  
387 model by having two sequences identified by the ChIP-seq analysis. The regions adjacent to the  
388 centromeres on the chromosome scaffolds are unresolved DNA sequence and both centromere  
389 regions contained long direct repeats. Thus, sample processing, sequencing, or assembly error  
390 could be responsible for the apparent duplication of the centromere on these chromosomes.  
391 Attempts to resolve the structure of the region using PCR were unsuccessful (data not shown).  
392 Alternatively, these may be true centromeres that have simply been duplicated. The presence of a  
393 nearby retrotransposon may support this theory, and could also confound PCR assays (Figure 3).  
394 Dicentric chromosomes have been noted in several organisms; however, typically only one of the  
395 centromeres is active and the other is inactivated (Cuacos et al., 2015; Neumann et al., 2012;  
396 Sato et al., 2012; Stimpson et al., 2012; Sullivan et al., 2001). The presence of two active  
397 centromeres typically leads to chromosomal breakage followed by either cell death or two  
398 functional monocentric chromosomes. Chromosomes with multiple functional centromeres have  
399 been identified. In human cells two active centromeres were in close proximity, essentially  
400 behaving as a single centromere (Sullivan and Willard, 1998). In rice, recombinant centromeres  
401 were found to contain 2 repetitive arrays; both recruited CENP-A, while an intervening sequence  
402 did not (Wang et al., 2013). Additionally, tricentric chromosomes were identified in wheat where  
403 one of the centromeres was large and presumably dominant, and co-occurring centromeres were  
404 smaller and weaker (Zhang et al., 2010).

405 ChIP-seq peaks were typically found only once per chromosome suggesting *P.*  
406 *tricornutum* has small monocentric regional centromeres. This centromere structure is also found  
407 in the closest related organisms with identified centromeres: the protist *P. falciparum* and the red  
408 alga *Cyanidioschyzon merolae* (Bowman et al., 1999; Iwanaga et al., 2010; Kanesaki et al., 2015;  
409 Maruyama et al., 2008). Both organisms have similarly sized centromeric DNA regions (~2-4  
410 kb) and also share low GC content as a characteristic of their centromeres: ~3% relative to the  
411 genome average GC of 21.8% in the case of *P. falciparum* (Bowman et al., 1999; Iwanaga et al.,  
412 2010), and 48.4% relative to the genome average GC of 55% for *C. merolae* (Kanesaki et al.,  
413 2015). Interestingly, *C. merolae*, which is the only other alga with well characterized

414 centromeres and the closest relation to *P. tricornutum* of the organisms studied, has centromeres  
415 with a GC content that is low compared to the genome average, similar to *P. tricornutum*.

416 Like *P. tricornutum*, the diatom *Thalassiosira pseudonana* can also utilize the yeast-  
417 derived *CEN6-ARSH4-HIS3* sequence to maintain episomes (Karas et al., 2015), which may  
418 suggest an overall similarity in DNA maintenance mechanisms. We analyzed the GC content of  
419 the *T. pseudonana* genome and found similar regions of low GC content that were often found  
420 once per chromosome-scale scaffold (Supplementary Figure 6). Thus, the ability of the yeast  
421 *CEN6-ARSH4-HIS3* sequence to support episomal maintenance in both species may be due to  
422 similar requirements for low GC sequences to function as centromeres. It is remarkable that  
423 these diatoms may have such similar centromere features, to the degree that the same sequence  
424 can function as a centromere in both organisms, given the ancient evolutionary divergence of the  
425 centric and pennate diatom lineages (~90 Myr ago, (Bowler et al., 2008)) and the relatively rapid  
426 evolution of centromere sequences and structures observed for other groups of organisms (Malik  
427 and Henikoff, 2002, 2009). Further CENP-A ChIP-seq experiments in *T. pseudonana* will enable  
428 centromere identification and comparison to *P. tricornutum*, including an examination of  
429 evolutionary implications.

430

### 431 **Simple centromere requirements permit nuclear maintenance of non-nuclear DNA** 432 **sequences**

433 In this study, by identifying characteristics of native diatom centromere sequences, we  
434 have uncovered a mechanism by which foreign DNA can become part of the nuclear DNA  
435 repertoire; non-nuclear DNA can act as a centromere, enabling stable maintenance as an  
436 extrachromosomal nuclear episome. Maintaining such plasmids may expand the diatom's genetic  
437 potential, and may also facilitate permanent integration into the nuclear chromosomes. We  
438 previously observed that DNA sequences from the yeast *Saccharomyces cerevisiae* could enable  
439 episome maintenance in *P. tricornutum* (Diner et al., 2016; Karas et al., 2015), and in this study,  
440 we confirmed that this sequence does, in fact, recruit the *P. tricornutum* centromeric histone  
441 protein CENP-A. The recruitment of this centromere-specific histone protein and subsequent  
442 maintenance of the episome in diatoms suggests the foreign DNA sequence is using native  
443 diatom DNA replication machinery, essentially functioning as a diatom centromere. There are  
444 very few examples in eukaryotes of foreign DNA recruiting host CENP-A to maintain a  
445 chromosome. Human centromeres have previously been shown to function in mouse  
446 chromosomes (Hadlaczky et al., 1991), and in a recent example, *Arabidopsis* centromeric repeats  
447 were shown to recruit human CENP-A and maintain chromosomes in human cells (Wada et al.,  
448 2016). In both cases, the chromosomes maintained by foreign DNA originally derived from  
449 chimeric host-donor DNA chromosomes followed by chromosomal breakage and/or  
450 rearrangement, resulting in smaller linear chromosomes or "mini-chromosomes." To our  
451 knowledge, there are no examples of immediate nuclear genome establishment (i.e., without  
452 chimeric intermediates) and maintenance in the host cell as a plasmid. This contrasts with  
453 bacteria, where DNA transfer between bacterial and subsequent plasmid establishment is quite  
454 common. Our results suggest that non-nuclear DNA can mimic diatom centromeres and, along  
455 with co-localized DNA, can immediately establish circular chromosomes in the diatom genome.

456 Establishment of centromeres in *P. tricornutum* is apparently governed by the simple rule  
457 of having a small length of sequence with a GC content less than ~33%. Although ChIP-seq  
458 peaks for centromeres averaged 39% GC over the entire 2-5 kb sequence, each centromeric  
459 ChIP-seq peak contained within it a 500-bp region less than ~33% GC. While 500-bp is the

460 shortest sequence we tested, it is possible that even smaller sequences could be sufficient to  
461 function as centromeres. Notably, 500-bp is a particularly short sequence to enable centromere  
462 function compared to previously studied organisms with regional centromeres; most regional  
463 centromeres are reported to be thousands of basepairs in length, compared to the relatively small  
464 (~125 bp) point centromeres of some yeast species. The low GC rule we propose here for *P.*  
465 *tricornutum* centromere establishment may also apply to diatom genes not originating in the  
466 nucleus, which in terms of diatom evolution represent a major source of diatom nuclear DNA. *P.*  
467 *tricornutum* chloroplast and mitochondrial genomes are low in GC content (32% average GC for  
468 the chloroplast, 35% average GC for the mitochondria), and we identified multiple sequences  
469 from each that could maintain episomes (Supplementary Figure 3).

470 Despite the experimental support for the simple average GC rule described above, three  
471 *Mycoplasma* sequences with GC less than 33% did not support episomal maintenance. When we  
472 examined the frequency of consecutive A+T nucleotides in the sequences, the 30% GC and 28%  
473 GC sequences that failed to support episomes had lower frequencies of sequences of 6 or more  
474 consecutive A+T bases. This lower frequency of contiguous A+T stretches was also apparent  
475 when comparing the set that failed to support episomes to a randomly generated set of 30% GC  
476 sequences. Thus, the true signal for centromere establishment in *P. tricornutum* may be the  
477 frequency or spacing of longer contiguous A+T sequences, and sequences of <33% GC content  
478 usually, but not always, happen to contain these signals. This hypothesis remains to be tested  
479 with additional sequences.

480 Most algal genomes studied to date contain large amounts of foreign DNA in their  
481 nuclear genomes, including recently acquired bacterial and viral DNA, transposable elements,  
482 and DNA acquired from endosymbionts (e.g., genes originating from chloroplast and  
483 mitochondrial genomes or secondary endosymbioses in the case of the Stramenopile algae)  
484 (Archibald, 2009). Thus, understanding mechanisms facilitating nuclear gene acquisition can  
485 shed light on algal diversity and evolution. For diatoms in particular, lateral gene transfer has  
486 played a major evolutionary role on multiple scales (Armbrust, 2009). Diatoms, like other  
487 stramenopiles, are the result of serial endosymbiotic events, though the precise details are still  
488 debated. Originally, a basal eukaryote engulfed and enslaved a cyanobacterium as a plastid,  
489 transferring much of the cyanobacterial genome to the nucleus (Martin, 2003). Later in  
490 evolutionary history, a non-photosynthetic eukaryote engulfed and enslaved a photosynthetic  
491 eukaryote. Endosymbiotic gene transfer from both the plastid and nuclear genomes of the  
492 secondary endosymbiotic event form a large portion of the current diatom nuclear genome. In  
493 both these events, the DNA transferred to the recipient nucleus was already inside the host cell.  
494 More recent gene transfers from bacteria are also apparent from genome analyses (Bowler et al.,  
495 2008), and the recent discovery that diatoms are amenable to bacterial conjugation (Karas et al.,  
496 2015) provides a potential mechanism for exogenous DNA transfer. Foreign DNA can also enter  
497 diatom cells through viral infection. In all these events, the mechanism by which the  
498 endosymbiotic or exogenous DNA becomes incorporated into the nuclear genome is unknown.

499 It is unclear why maintenance of foreign DNA in the form of episomes appears to be well  
500 tolerated in *P. tricornutum*. One possibility is that transfer of foreign DNA into diatoms, or  
501 intracellular transfer of previously acquired non-nuclear genetic material, is not common enough  
502 for a defense system to have evolved (such as the production of restriction enzymes in bacteria to  
503 destroy foreign DNA). In contrast to bacteria-bacteria DNA transfer, non-native genes are  
504 unlikely to be expressed from a plasmid transferred to a diatom if they are of bacterial origin.  
505 Functional gene expression would only occur in the unlikely event that it acquired diatom

506 transcriptional, translational, and subcellular localization signals through further modification.  
507 Thus, it is possible there was not strong selection to evolve defense mechanisms against foreign  
508 DNA because they were not detrimental to cell fitness and most events were entirely innocuous.  
509 If such permissiveness occurs for maintenance of DNA transferred through extracellular  
510 mechanisms, it is likely that it would also apply to DNA transferred to the nucleus intracellularly  
511 from organelles to the nucleus.

512

## 513 **Conclusions**

514 Identifying and characterizing centromeres is essential for understanding cellular biology,  
515 as these are critical features for stable DNA maintenance during cell division. These sequences  
516 can also advance synthetic biology through the development of new molecular tools, including  
517 artificial chromosome optimization. Here, we have used multiple approaches to characterize the  
518 centromeres of the diatom *P. tricornutum*. We found very simple sequence requirements for  
519 DNA to function as a centromere, namely a moderately low GC content of <33% across a small  
520 region, with 500-bp being that smallest size examined. While most sequences with GC content of  
521 <33% allowed episomal maintenance, a few sequences with this simple characteristic did not,  
522 and we predicted that a higher frequency of stretches of contiguous A+T bases may be as  
523 important as overall average GC content of a fragment in establishing a centromere and  
524 supporting an episome. Based on bioinformatic analyses, we predict that these features of  
525 centromere identity may be conserved in the distantly related diatom *Thalassiosira pseudonana*.  
526 While low GC content has often been identified as a centromeric DNA feature, the diatom  
527 centromeres appear to be unique from many other eukaryotes in that they are not composed of  
528 repeat regions or other notable primary structures, and that the functional centromere region may  
529 be quite small. We also show that these simple requirements mean foreign and non-nuclear DNA  
530 sequences with these characteristics can act as centromeres in diatoms, becoming established as  
531 extrachromosomal nuclear episomes. Diatoms possess nuclear genes acquired from many foreign  
532 DNA sources including viruses, bacteria, and other eukaryotes, which includes the ancient  
533 endosymbiotic acquisition of mitochondria and chloroplasts. Our findings present a host-  
534 permissive mechanism by which DNA derived from either external or intracellular genetic  
535 compartments can become a part of the nuclear DNA repertoire by utilizing host replication and  
536 maintenance machinery. This may ultimately lead to gene integration into diatom genomes and  
537 subsequent evolutionary diversification.

538

539

## 540 **Materials and Methods**

### 541 **Strains and culturing conditions**

542 *Phaeodactylum tricornutum* strain CCMP 632 cultures were grown in L1 artificial  
543 seawater medium (Price et al., 1989) or on ½xL1-agar plates at 18°C under cool white  
544 fluorescent lights (50  $\mu\text{E m}^{-2} \text{s}^{-1}$ ) as previously described (Diner et al., 2016; Karas et al., 2015).  
545 Ex-conjugants were selected on phleomycin (20  $\mu\text{g mL}^{-1}$ ). *Escherichia coli* (Epi300, Epicentre,  
546 WI, USA) were grown in LB broth or agar supplemented with ampicillin (100  $\mu\text{g mL}^{-1}$ ),  
547 tetracycline (10  $\mu\text{g mL}^{-1}$ ), chloramphenicol (20  $\mu\text{g mL}^{-1}$ ), gentamicin (20  $\mu\text{g mL}^{-1}$ ), or  
548 combinations of these as needed.

549 DNA was obtained from multiple organisms to test sequences for episome maintenance,  
550 including *P. tricornutum*, Synthetic *Mycoplasma mycoides* JCVI-syn1.0 (NCBI accession  
551 #CP002027), and *Altermonas macleodii* strain U4 containing the pAMDE1 plasmid (NCBI



552 accession #CP004849)(López-Pérez et al., 2013). Because templates for PCR amplification of  
553 *Cylindrotheca fusiformis* plasmids pCF1 (NCBI accession #X64302) and pCF2 (NCBI accession  
554 #X64303) were not available, we synthesized the DNA sequences by assembling 18 individual  
555 oligonucleotides (CF1-1 through 18 and CF2-1 through 18, respectively) using Gibson assembly  
556 (Supplementary Table 8)(Gibson et al., 2009; Hildebrand et al., 1992).

557

### 558 **Construction of plasmid pPtPBR1-YFP-CENP-A for native centromere identification**

559 The plasmid pPtPBR1-YFP-CENP-A was constructed to express the CENP-A protein in  
560 *P. tricornutum*, tagged with a fluorescent protein for use in cellular localization and ChIP-seq  
561 analyses. The plasmid was constructed by Gibson assembly with a PBR322 backbone, and  
562 contains an N-terminal YFP fused to *P. tricornutum* CENP-A (Phatr2\_16843 but with the wrong  
563 start site. See Supplementary Figure 7 for complete sequence, translation, and genome  
564 coordinates of *P. tricornutum* CENP-A used for cloning), a design modeled after prior  
565 *Arabidopsis thaliana* YFP-CENP-A fusions (Ravi and Chan, 2010) (Supplemental Figure 8).

566 First, ShBle cassette was added to the pUC19 cassette. Plasmid pUC19 was digested with  
567 EcoRI and SmaI and the ShBle Cassette from pAF6 (Falciatore et al., 1999) was amplified using  
568 primers Puc-ShBle-F and Puc-ShBle-R. The resulting plasmid, pUC19-ShBle, was digested with  
569 HindIII and BamHI and the FcpB promoter (amplified with primers Puc-PromTerm-1 and Puc-  
570 PromTerm-2) and FcpA terminator (amplified with primers Puc-PromTerm-3 and Puc-  
571 PromTerm-4) regions were assembled in three fragments by Gibson assembly. The resulting  
572 plasmid, pUC19-ShBle-PromTerm, contains an AgeI restriction site between the promoter and  
573 terminator regions. Next, plasmid pUC19-ShBle-PromTerm was digested with AgeI and it was  
574 assembled with YFP (CENPA-YFP-3 + CENPA-YFP-4) and CENPA (CENPA-YFP-5 +  
575 CENPA-YFP-8) PCR products to create plasmid pUC19-ShBle-YFP-CENPA. Plasmid pUC19-  
576 ShBle-YFP-CENPA contains an N-terminal YFP fused to *P. tricornutum* CENPA and the two  
577 domains are separated by a linker consisting of 5 glycines and 1 alanine. Fusion of YFP to the N-  
578 terminus CENP-A was modeled after *Arabidopsis* fusions (Ravi and Chan, 2010). The insert  
579 FcpBprom-YFP-CENPA-FcpAterm was amplified from Puc19-ShBle-YFP-CENPA using  
580 primers PtPBRYFP-CENPA-1 and PtPBRYFP-CENPA-2 and assembled into pPtPBR1 which  
581 was amplified in two pieces using primers PtPBRnanoluc5 and PtPBRrev for piece 1 and  
582 PtPBRnanoluc4 and PtPBRfor for piece 2. The result of the three-piece assembly was named  
583 pPtPBR-YFP-CENPA. The sequence of the YFP-CENP-A insert was verified by Sanger DNA  
584 sequencing, and the plasmid was transformed into *E. coli* strain Epi300 containing the plasmid  
585 pTA-MOB and mobilized into *P. tricornutum* by conjugation. *P. tricornutum* cells containing  
586 plasmid pPtPBR1-YFP-CENP-A were grown in liquid culture to a density of  $3 \times 10^6$  cells mL<sup>-1</sup>.  
587 Cells were harvested simultaneously for microscopy, Western blot, and ChIP (Supplementary  
588 Figure 8).

589

### 590 **Western Blot confirmation of YFP-CENP-A fusion protein expression and microscopy** 591 **localization**

592 For the Western Blot, 50 mL cultures of late log phase ( $1 \times 10^6$  cells mL<sup>-1</sup>) *P. tricornutum*  
593 cells expressing plasmid pPtPBR1-YFP-CENP-A were centrifuged for 10 minutes at 4,000g and  
594 resuspended in 1x NuPAGE LDS sample buffer (Life Technologies) containing 50 mM  
595 dithiothreitol. Resuspended cells were divided into 300  $\mu$ L aliquots and sonicated (15 minutes: 1  
596 minute high power, 30 seconds off) in a Diagenode Bioruptor cooled to 4°C. Lysates were  
597 cleared by centrifugation at 16,000g for 10 minutes at 4°C, and were stored at -20°C until use.

598 Lysates were diluted approximately four-fold, heated for 5 minutes at 95°C, and centrifuged for  
599 2 minutes at 16,000g to remove precipitates. Proteins were separated by SDS-PAGE on  
600 NuPAGE Novex 12% Bis-Tris polyacrylamide gels (Life Technologies) in 1x MOPS running  
601 buffer (Life Technologies) for 1 hour at 150 V. Separated proteins were transferred by  
602 electroblotting to nitrocellulose membranes for 1 hour at 100 V in 1x Transfer Buffer (Life  
603 Technologies) containing 10% methanol. Blots were incubated in blocking solution for 30  
604 minutes at room temperature (WesternBreeze Chemiluminescent Kit, Life Technologies) and  
605 incubated with primary antibody (anti-GFP, AB290 from AbCam) diluted 1:500 in prepared  
606 blocking solution overnight at room temperature. Blots were then washed 4 times with 1x TBST  
607 for 5 minutes per wash and incubated with goat anti-rabbit secondary solution (WesternBreeze  
608 Chemiluminescent Kit, Life Technologies). Blots were washed 4 times with 1x TBST for 5 min  
609 per wash and incubated with CDP-Star chemiluminescent substrate and imaged with the C-digit  
610 (LiCor, NE, USA).

611 To visualize the expression of the YFP-labeled CENP-A protein in *P. tricornutum*, live  
612 ex-conjugant cells were imaged on a Zeiss (Oberkochen, Germany) axioscope epifluorescent  
613 microscope with a YFP filter. Strains positive for the YFP construct were washed twice in PBS  
614 and incubated with the nuclear counter-stain DAPI (4',6-diamidino-2-phenylindole), 300 nM, for  
615 three minutes. Cells were re-washed, oil mounted and visualized on a Leica (Wetzlar, Germany)  
616 TCS SP5 confocal laser scanning microscope using a 405 nm diode laser (emission 440- 470  
617 nM) for DAPI and a 514 nm argon laser (emission 530 – 570 nm) for the YFP, while plastid  
618 autofluorescence was monitored at 700–740 nm (Supplementary Figure 8).

619

## 620 **Chromatin immunoprecipitation (ChIP) sequencing and qPCR**

621 For ChIP, 2-4 x 10<sup>8</sup> cells were pelleted. Fixation, extraction, and sonication were  
622 performed as previously described (Lin et al., 2012). Immunoprecipitations were performed  
623 using the OneDay ChIP kit from Diagenode following the manufacturer's instructions. For  
624 small-scale qPCR experiments 66 µL of sheared chromatin was used, and for large-scale  
625 sequencing experiments 2,300 µL of chromatin was used with proportional increases in reagents.  
626 ChIP-grade Anti-GFP (AB290, Abcam MA, USA) was used at 1 µL per reaction for small-scale  
627 and 30 µL for large-scale; controls omitting antibody during immunoprecipitation were also  
628 performed.

629 For ChIP-seq, libraries for the Illumina sequencing platform were prepared from the  
630 large-scale ChIP reactions. ChIP samples were concentrated by vacuum centrifugation followed  
631 by purification on a Qiagen PCR cleanup column. Libraries for input DNA, anti-GFP antibody,  
632 and no antibody control samples were prepared using the NEBNext Ultra II kit (New England  
633 Biosciences, MA, USA). After end preparation, adapter ligation, and cleanup, the libraries were  
634 barcoded using 5 cycles of PCR for the input library and 12 cycles of PCR for the ChIP samples  
635 performed with antibody and without antibody. After final cleanup with SPRI beads, the samples  
636 were sequenced on an Illumina MiSeq DNA sequencer. Approximately 4 million paired end  
637 reads were obtained for the input library while 1 million paired ends reads were obtained for  
638 each of the ChIP reactions performed with and without antibody. Sequences were mapped onto  
639 the *P. tricornutum* genome using CLC. We performed qPCR as described in Karas et al. 2015.  
640 Primer sets were designed to amplify regions on the episome including the ARSH4 region which  
641 was associated with a ChIP-seq peak (primers: Q-ARS-1 + Q-ARS-2) and the TetR region as a  
642 negative control (primers: Q-TETR-1 + Q-TETR-2), which were separated by 3.4 kb. Regions on  
643 native *P. tricornutum* chromosome 25 were amplified by primers Q-25HR-1 + Q-25HR-2 for the

644 region that recruited a ChIP-seq peak, and by primers Q-25control-1 and Q-25control-2 for a  
645 region with that did not. Product sizes for all qPCR reactions were 100-200 bp. For ChIP-qPCR,  
646 Ct values were obtained for input, no-antibody control, and anti-YFP reactions. Data was  
647 analyzed as previously described (Lin et al., 2012). First, input Ct values were adjusted to  
648 account for dilution. Then  $\Delta Ct$  were calculated by subtracting the corrected input values from the  
649 Ct values from no-antibody control and anti-YFP samples ( $\Delta Ct = Ct_{\text{sample}} - Ct_{\text{correctedinput}}$ ). Percent  
650 input was calculated as  $100/(2^{\Delta Ct})$ .

651

## 652 **Bioinformatic Analyses**

653 Bioinformatic analyses were conducted to map peak reads to the *P. tricornutum* genome  
654 assembly, to correlate the GC content of *P. tricornutum* DNA regions with CENP-A ChIP-seq  
655 peaks, and to identify sequence features unique to centromere and centromere-like maintenance  
656 sequences. The genome was first broken down into various sized windows from 10-kb to 0.5-kb  
657 with 20% sequence overlap with each step. We then calculated the GC content of *P. tricornutum*  
658 genomic DNA sequence in 100-bp windows that advanced by 50-bp each step. To identify small  
659 regions (1-5 kb) with higher densities of low GC sequences, we counted the number of 100-bp  
660 windows with GC below a given threshold. We tested regions from 2 kb to 5 kb (advancing 1 kb  
661 each step) and GC thresholds less than or equal to values 30-33. Sequences predicted to be  
662 centromeres by ChIP-seq and further confirmed by GC analysis were examined for sequence  
663 similarity by BLAST. The set of 29 putative centromere sequences on 27 scaffolds was searched  
664 against a database constructed from the set itself using blastn with default settings (BLAST  
665 v2.2.29). Sequence motifs among the putative centromere sequences were searched using  
666 MEME (Bailey et al., 2009), and the presence of repeated sequence in the centromeres was  
667 searched with Tandem Repeat Finder (Benson, 1999). The 500-bp regions containing the lowest  
668 GC content were tested for centromere function in downstream analysis.

669 Double-stranded K-mer frequency matrices were generated using sliding window of size  
670 K through each sequence. A window size (K) of 6 was chosen as it was the longest string that  
671 was still well-represented in a sequence of 500-bp. At each window step, the 6-mer was counted  
672 along with its reverse complement. 6-mer count vectors were normalized by the total 6-mers in  
673 the sequence to weight sequences of varying length equally. To avoid double-counting of 6-  
674 mers and to allow for arbitrary orientation of the centromere sequence, each 6-mer was  
675 represented by a forward and reverse complement sequence, and only a single representation was  
676 considered in downstream analysis. Each 6-mer at this stage encoded information for both  
677 strands and the frequency was multiplied by 2 so each 6-mer vector summed to 1.

678 Genomic control sequences were selected *in silico* by slicing the *P. tricornutum* genomic  
679 DNA sequence at random positions. The number and length of the genomic control sequences  
680 mirror the number and length of the centromeric sequences. Null sets of random sequences were  
681 generated with a target GC of 47% (similar to non-centromere average) and 39% (similar to  
682 centromere ChIP-seq peak average). P-values were calculated using a Wilcoxon signed-rank test  
683 for each 6-mer between the centromere group and each of the control groups. If the distribution  
684 of a 6-mer was significantly different ( $P < 0.001$ ) when tested against genomic and null control  
685 groups, then it was used in the subsequent downstream analysis.

686 The frequency of contiguous A+T sequences was calculated as follows. The DNA  
687 sequences were recoded using IUPAC ambiguity codes to represent {G,C} as S (Strong) and  
688 {A,T} as W (Weak). Consecutive W sequences were counted by choosing a size K and  
689 identifying every position in which a window composed entirely of W nucleotides of size K was

690 found in the sequence; counts were normalized by total K-mers in the sequence (i.e., dividing  
691 counts by length(sequence) - K + 1). Computational analysis was employed in Python 3.5.2  
692 using the Continuum Analytics Scientific Computing ecosystem for data processing (NumPy  
693 v1.11, SciPy v0.18.1, and Pandas 0.19.1), data visualization (Matplotlib v1.5.1 and Seaborn  
694 v0.7.1), and sequence handling (Scikit-Bio v0.5.1).

695

### 696 ***P. tricornutum* genomic library construction**

697 Genomic DNA from *P. tricornutum* was prepared using the DNeasy Plant Mini kit  
698 (Qiagen, Hilden, Germany) using approximately 100 mL of  $1 \times 10^6$  cells mL<sup>-1</sup>. Cells were  
699 pelleted and resuspended in 400  $\mu$ L AP1, and DNA was extracted following the manufacturer's  
700 instructions. Fourteen  $\mu$ g DNA in 200  $\mu$ L TE buffer were sonicated using a Covaris (MA, USA)  
701 red miniTUBE to generate fragments centered around 5 kb. Fifty  $\mu$ L was then used for end repair  
702 and adapter ligation with the NEB Next Ultra II library kit. Adapter ligated fragments were  
703 amplified using Index primer 1 and the Universal primer for 8 cycles. After purification with  
704 SPRI beads (Agencourt AMPure XP, Beckman Coulter, CA, USA), fragments were assembled  
705 into the vector backbone pPtPBR2, which was PCR amplified using primers PtPBR2-Illumina-F  
706 and PtPBR2-Illumina-R (Supplementary Table 8). The assembly reaction was transformed into  
707 pTA-MOB-containing *E. coli* cells and colonies were screened for the presence of *P.*  
708 *tricornutum* genomic DNA inserts using flanking primers CAHtest1+InsertR (Supplementary  
709 Table 4). The library ultimately consisted of ~6000 *E. coli* colonies containing 2- 5 kb genomic  
710 DNA inserts, with an estimated coverage of ~0.7x of the *P. tricornutum* genome. Genome size  
711 per cell was estimated at 43 Mb, including 27.4 Mb for the nuclear genome, ~100x of the 0.118  
712 Mb chloroplast genome, and ~50x of the 0.077 Mb mitochondrion genome. Chloroplast and  
713 mitochondrion genome copy numbers were based on prior calculations (Karas et al., 2015). The  
714 library was stored and conjugated into *P. tricornutum* in 9 equal pools of approximately 600-700  
715 *E. coli* colonies to preserve diversity. The resulting 20-100 *P. tricornutum* colonies for each pool  
716 were patched onto L1 plates containing phelomycin 20  $\mu$ g mL<sup>-1</sup> and chloramphenicol 20  $\mu$ g mL<sup>-1</sup>.  
717 After sufficient growth, plates containing patched *P. tricornutum* colonies were flooded with  
718 L1 medium, scraped, and pooled, at which point episomes were extracted as previously  
719 described (Karas et al., 2015). Transformation of the extracted episomes to *E. coli* via  
720 electroporation yielded episomes that had been successfully maintained in *P. tricornutum*.  
721 Colony PCR reactions to amplify the inserts were performed using primers CAHtest1 and  
722 InsertR (Supplementary Table 4). PCR products were purified followed by Sanger DNA  
723 sequencing performed by Genewiz, Inc.

724

### 725 **Plasmid construction, conjugative DNA transfer, and episome maintenance confirmation**

726 Plasmids were constructed to examine the ability of the foreign and endogenous DNA  
727 sequences to maintain DNA as episomal vectors in diatoms. All primers used for insert  
728 amplification and assembly, along with template sequence coordinates, are listed in  
729 Supplementary Tables 8 and 9, along with additional assembly details.

730 To test large regions of *P. tricornutum* DNA, we used overlapping 100-kb regions from  
731 chromosomes 25 and 26 that were previously cloned in in a modified pCC1BAC vector  
732 (conferring *E. coli* chloramphenicol resistance) as described previously (Karas et al., 2013).  
733 These plasmids contained the *CEN6-ARSH4-HIS3* (CAH) fragment as part of the yeast-based  
734 TAR cloning procedure. Plasmids were transferred to *E. coli*, and lambda red recombineering  
735 (Datsenko and Wanner, 2000) was used to replace the CAH with a kanamycin resistance gene.



736 The kanamycin resistance cassette was amplified by PCR from the plasmid pACYC177 using  
737 primers KO-CAH-1 and KO-CAH-2. The resulting PCR product contained 40-bp homology at  
738 the 5' and 3' ends to regions flanking the CAH cassette in the vector backbone. The PCR product  
739 was purified, adjusted to 100-200 ng  $\mu\text{l}^{-1}$ , and introduced by electroporation into *E. coli* cells that  
740 contained both the cloned 100-kb fragments and lambda red plasmid pKD46 according to the  
741 recommended procedure (Datsenko and Wanner, 2000). Replacement of the CAH region by the  
742 kanamycin resistance cassette was confirmed by PCR on the resulting *E. coli* colonies that were  
743 resistant to kanamycin and chloramphenicol.

744 For all other DNA sequences tested for episomal maintenance in this study, the vector  
745 pPtPBR2, which is incapable of episomal maintenance in diatoms, was used as a backbone  
746 (Diner et al., 2016)(Supplementary Table 9). DNA vector inserts were PCR amplified and  
747 confirmed by gel electrophoresis. Vectors were assembled using Gibson assembly, and screened  
748 using restriction digest. In addition to the 100-kb *P. tricornutum* DNA regions described above,  
749 several smaller regions of chromosomes 25 and 26 were examined for episome maintenance  
750 ability including three 10-kb regions (Pt-10kb-6, Pt-10kb-9, Pt-10kb-12) and two 1 kb regions  
751 (Pt-1kb-25, Pt-1kb-26). Based on the results of the ChIP-seq analysis an additional 38 constructs  
752 (Test1-40) were created to confirm the functionality of the predicted centromere sequences.

753 Foreign DNA inserts of various insert sizes (500-, 700-, and 1000-bp) and GC contents  
754 (15, 21, 28, 30, 40, and 50%) were obtained from the *M. mycooides* JCVI-syn1.0 genome. In total,  
755 24 *M. mycooides*-based insert sequences were tested. Two insert sequences containing ~500 bp of  
756 *A. macleodii* pAMDE1 plasmid DNA were tested for episome maintenance, which contained  
757 ~26 and 29% GC content each. To examine maintenance ability of *C. fusiformis* plasmid DNA,  
758 one insert sequence of ~500-bp was synthesized from each of the two CF plasmids, pCF1 and  
759 pCF2 (Supplementary Table 5).

760 DNA was transferred by conjugation from *E. coli* into *P. tricornutum* following  
761 previously described methods (Diner et al., 2016; Karas et al., 2015). Each experiment was run  
762 alongside positive (pPtPBR1) and negative (pPtPBR2) control plasmids, and efficiency of  
763 conjugation was determined by comparing the number of ex-conjugant colonies obtained after  
764 conjugation with a plasmid to the number of ex-conjugant colonies obtained from the negative  
765 control plasmid (pPtPBR2) performed simultaneously. Ex-conjugant diatom lines representing  
766 each foreign and endogenous DNA source were further examined for the presence of the  
767 episome in *P. tricornutum* (as opposed to selective marker genomic integration) and  
768 maintenance. These lines were passaged on selection for ~1 month (transferred weekly) to avoid  
769 plasmid carryover, and the absence of *E. coli* donors was confirmed by plating on LB agar  
770 medium. Plasmids were isolated using the modified alkaline lysis protocol described in Karas et  
771 al. 2015, and were subsequently transformed into *E. coli* by electroporation to confirm plasmid  
772 presence. Lines were then passaged semi-continuously in liquid media containing antibiotics for  
773 ~30 days before plasmid extraction, *E. coli* transformation, and confirmation of plasmid presence  
774 and size using restriction digest (Diner et al., 2016; Karas et al., 2015).

775

## 776 **Acknowledgements**

777 We thank John McCrow for many helpful discussions concerning bioinformatics and Sarah  
778 Smith for assistance with ChIP-seq. Funding for this work was provided by the Gordon and  
779 Betty Moore Foundation (GBMF5007 to P. D. W. and C. L. D., GBMF3828 and GBMF5006 to  
780 A. E. A.), the U.S. Department of Energy (DE- SC0008593) to A. E. A. and C. L. D., and the  
781 National Science Foundation (NSF-MCB-1129303 to C. L. D. and OCE-1136477 to A. E. A.).

782

## 783 **Competing Interests**

784 The authors declare no competing financial or non-financial competing interests.

785

## 786 **References**

- 787 Albertson, D. G., and Thomson, J. N. (1982). The kinetochores of *Caenorhabditis elegans*.  
788 *Chromosoma* 86, 409–428. doi:10.1007/BF00292267.
- 789 Altschul, S. F., Gish, W., Miller, W., Myers, E. W., and Lipman, D. J. (1990). Basic local  
790 alignment search tool. *J. Mol. Biol.* 215, 403–10. doi:10.1016/S0022-2836(05)80360-2.
- 791 Archibald, J. M. (2009). The Puzzle of Plastid Evolution. *Curr. Biol.* 19, R81–R88.  
792 doi:10.1016/j.cub.2008.11.067.
- 793 Armbrust, E. V. (2009). The life of diatoms in the world’s oceans. *Nature* 459, 185–92.  
794 doi:10.1038/nature08057.
- 795 Armbrust, E. V., Berges, J. a, Bowler, C., Green, B. R., Martinez, D., Putnam, N. H., et al.  
796 (2004). The genome of the diatom *Thalassiosira pseudonana*: ecology, evolution, and  
797 metabolism. *Science* 306, 79–86. doi:10.1126/science.1101156.
- 798 Bailey, T. L., Boden, M., Buske, F. A., Frith, M., Grant, C. E., Clementi, L., et al. (2009).  
799 MEME Suite: Tools for motif discovery and searching. *Nucleic Acids Res.* 37, 1–7.  
800 doi:10.1093/nar/gkp335.
- 801 Benson, G. (1999). Tandem Repeats Finder: a program to analyse DNA sequences. *Nucleic*  
802 *Acids Res.* 27, 573–578.
- 803 Bowler, C., Allen, A. E., Badger, J. H., Grimwood, J., Jabbari, K., Kuo, A., et al. (2008). The  
804 *Phaeodactylum* genome reveals the evolutionary history of diatom genomes. *Nature* 456,  
805 239–44. doi:10.1038/nature07410.
- 806 Bowman, S., Lawson, D., Basham, D., Brown, D., Chillingworth, T., Churcher, C. M., et al.  
807 (1999). The complete nucleotide sequence of chromosome 3 of *Plasmodium falciparum*.  
808 *Nature* 400, 532–8. doi:10.1038/22964.
- 809 Bozarth, A., Maier, U. G., and Zauner, S. (2009). Diatoms in biotechnology: Modern tools and  
810 applications. *Appl. Microbiol. Biotechnol.* 82, 195–201. doi:10.1007/s00253-008-1804-8.
- 811 Cheeseman, I. M., and Desai, A. (2008). Molecular architecture of the kinetochore–microtubule  
812 interface. *Nat. Rev. Mol. Cell Biol.* 9, 33–46. doi:10.1038/nrm2310.
- 813 Clarke, L., Amstutz, H., Fishel, B., and Carbon, J. (1986). Analysis of centromeric DNA in the  
814 fission yeast *Schizosaccharomyces pombe*. *Proc. Natl. Acad. Sci. U. S. A.* 83, 8253–7.  
815 doi:10.1073/pnas.83.21.8253.
- 816 Clarke, L., and Carbon, J. (1980). Isolation of a yeast centromere and construction of functional  
817 small circular chromosomes. *Nature* 287, 504–509. doi:10.1038/287504a0.
- 818 Cleveland, D. W., Mao, Y., and Sullivan, K. F. (2003). Centromeres and kinetochores: From  
819 epigenetics to mitotic checkpoint signaling. *Cell* 112, 407–421. doi:10.1016/S0092-  
820 8674(03)00115-6.
- 821 Cottarel, G., Shero, J. H., Hieter, P., and Hegemann, J. H. (1989). A 125 bp CEN6 DNA  
822 fragment is sufficient for complete meiotic and mitotic centromere functions in  
823 *Saccharomyces cerevisiae*. *Trends Genet.* 5, 322–324. doi:10.1016/0168-9525(89)90119-4.
- 824 Coudreuse, D. (2009). Insights from synthetic yeasts. *Yeast* 26, 545–551. doi:10.1002/yea.
- 825 Cuacos, M., H. Franklin, F. C., and Heckmann, S. (2015). Atypical centromeres in plants—what  
826 they can tell us. *Front. Plant Sci.* 6, 1–15. doi:10.3389/fpls.2015.00913.
- 827 Datsenko, K. A., and Wanner, B. L. (2000). One-step inactivation of chromosomal genes in

- 828 *Escherichia coli* K-12 using PCR products. *Proc. Natl. Acad. Sci. U. S. A.* 97, 6640–5.  
829 doi:10.1073/pnas.120163297.
- 830 Diner, R. E., Bielinski, V. A., Dupont, C., Allen, A. E., and Weyman, P. D. (2016). Refinement  
831 of the Diatom Episome Maintenance Sequence and Improvement of Conjugation-based  
832 DNA Delivery Methods. *Front. Bioeng. Biotechnol.* 4, 65. doi:10.3389/FBIOE.2016.00065.
- 833 Earnshaw, W. C., Allshire, R. C., Black, B. E., Bloom, K., Brinkley, B. R., Brown, W., et al.  
834 (2013). Esperanto for histones: CENP-A, not CenH3, is the centromeric histone H3 variant.  
835 *Chromosom. Res.* 21, 101–106. doi:10.1007/s10577-013-9347-y.
- 836 Falciatore, A., Casotti, R., Leblanc, C., Abrescia, C., and Bowler, C. (1999). Transformation of  
837 Nonselectable Reporter Genes in Marine Diatoms. *Mar. Biotechnol.* 1, 239–251.  
838 doi:10.1007/PL00011773.
- 839 Fu, W., Wichuk, K., and Brynjólfsson, S. (2015). Developing diatoms for value-added products:  
840 Challenges and opportunities. *N. Biotechnol.* 32, 547–551. doi:10.1016/j.nbt.2015.03.016.
- 841 Gibson, D. G., Young, L., Chuang, R.-Y., Venter, J. C., Hutchison, C. a, and Smith, H. O.  
842 (2009). Enzymatic assembly of DNA molecules up to several hundred kilobases. *Nat.*  
843 *Methods* 6, 343–345. doi:10.1038/nmeth.1318.
- 844 Hadlaczký, G., Praznovszky, T., Cserpán, I., Kereső, J., Péterfy, M., Kelemen, I., et al. (1991).  
845 Centromere formation in mouse cells cotransformed with human DNA and a dominant  
846 marker gene. *Proc. Natl. Acad. Sci. U. S. A.* 88, 8106–10. Available at:  
847 <http://www.pubmedcentral.nih.gov/articlerender.fcgi?artid=52455&tool=pmcentrez&render>  
848 [type=abstract](http://www.pubmedcentral.nih.gov/articlerender.fcgi?artid=52455&tool=pmcentrez&render).
- 849 Harrington, J. J., VanBokken, G., Mays, R. W., Gustashaw, K., and Willard, H. F. (1997).  
850 Formation of de novo centromeres and construction of first-generation human artificial  
851 microchromosomes. *Nat. Genet.* 15, 57–61.
- 852 Henikoff, S., Ahmad, K., and Malik, H. S. (2001). The centromere paradox: stable inheritance  
853 with rapidly evolving DNA. *Science* 293, 1098–1102. doi:10.1126/science.1062939.
- 854 Hildebrand, M., Hasegawa, P., Ord, R. W., Thorpe, V. S., Glass, C. A., and Volcani, B. E.  
855 (1992). Nucleotide-Sequence of Diatom Plasmids - Identification of Open Reading Frames  
856 with Similarity to Site-Specific Recombinases. *Plant Mol. Biol.* 19, 759–770. doi:Doi  
857 10.1007/Bf00027072.
- 858 Iwanaga, S., Kato, T., Kaneko, I., and Yuda, M. (2012). Centromere plasmid: A new genetic tool  
859 for the study of *Plasmodium falciparum*. *PLoS One* 7. doi:10.1371/journal.pone.0033326.
- 860 Iwanaga, S., Khan, S. M., Kaneko, I., Christodoulou, Z., Newbold, C., Yuda, M., et al. (2010).  
861 Functional Identification of the *Plasmodium* Centromere and Generation of a *Plasmodium*  
862 Artificial Chromosome. *Cell Host Microbe* 7, 245–255. doi:10.1016/j.chom.2010.02.010.
- 863 Jacobs, J. D., Ludwig, J. R., Hildebrand, M., Kukel, A., Feng, T. Y., Ord, R. W., et al. (1992).  
864 Characterization of two circular plasmids from the marine diatom *Cylindrotheca fusiformis*:  
865 plasmids hybridize to chloroplast and nuclear DNA. *MGG Mol. Gen. Genet.* 233, 302–310.  
866 doi:10.1007/BF00587592.
- 867 Kanesaki, Y., Imamura, S., Matsuzaki, M., and Tanaka, K. (2015). Identification of centromere  
868 regions in chromosomes of a unicellular red alga, *Cyanidioschyzon merolae*. *FEBS Lett.*  
869 589, 1219–1224. doi:10.1016/j.febslet.2015.04.009.
- 870 Kapoor, S., Zhu, L., Froyd, C., Liu, T., and Rusche, L. N. (2015). Regional centromeres in the  
871 yeast *Candida lusitanae* lack pericentromeric heterochromatin. *Proc. Natl. Acad. Sci. U. S.*  
872 *A.* 112, 12139–44. doi:10.1073/pnas.1508749112.
- 873 Karas, B. J., Diner, R. E., Lefebvre, S. C., McQuaid, J., Phillips, A. P. R., Noddings, C. M., et al.

- 874 (2015). Designer diatom episomes delivered by bacterial conjugation. *Nat. Commun.* 6,  
875 6925. doi:10.1038/ncomms7925.
- 876 Karas, B. J., Molparia, B., Jablanovic, J., Hermann, W. J., Lin, Y.-C., Dupont, C. L., et al.  
877 (2013). Assembly of eukaryotic algal chromosomes in yeast. *J. Biol. Eng.* 7, 30.  
878 doi:10.1186/1754-1611-7-30.
- 879 Kouprina, N., Tomilin, A. N., Masumoto, H., Earnshaw, W. C., and Larionov, V. (2014). Human  
880 artificial chromosome-based gene delivery vectors for biomedicine and biotechnology.  
881 *Expert Opin. Drug Deliv.* 11, 517–35. doi:10.1517/17425247.2014.882314.
- 882 Lin, X., Tirichine, L., Bowler, C., Round, F., Crawford, R., Mann, D., et al. (2012). Protocol:  
883 Chromatin immunoprecipitation (ChIP) methodology to investigate histone modifications in  
884 two model diatom species. *Plant Methods* 8, 48. doi:10.1186/1746-4811-8-48.
- 885 Liu, W., Yuan, J. S., and Stewart Jr, C. N. (2013). Advanced genetic tools for plant  
886 biotechnology. *Nat Rev Genet* 14, 781–793. doi:10.1038/nrg3583.
- 887 López-Pérez, M., Gonzaga, A., and Rodriguez-Valera, F. (2013). Genomic diversity of “deep  
888 ecotype” *Alteromonas macleodii* isolates: Evidence for pan-mediterranean clonal frames.  
889 *Genome Biol. Evol.* 5, 1220–1232. doi:10.1093/gbe/evt089.
- 890 Lopez, P. J., Desclés, J., Allen, A. E., and Bowler, C. (2005). Prospects in diatom research. *Curr.*  
891 *Opin. Biotechnol.* 16, 180–6. doi:10.1016/j.copbio.2005.02.002.
- 892 Lynch, D. B., Logue, M. E., Butler, G., and Wolfe, K. H. (2010). Chromosomal G + C content  
893 evolution in yeasts: Systematic interspecies differences, and GC-poor troughs at  
894 centromeres. *Genome Biol. Evol.* 2, 572–583. doi:10.1093/gbe/evq042.
- 895 Ma, J., Wing, R. a., Bennetzen, J. L., and Jackson, S. a. (2007). Plant centromere organization: a  
896 dynamic structure with conserved functions. *Trends Genet.* 23, 134–139.  
897 doi:10.1016/j.tig.2007.01.004.
- 898 Malik, H. S., and Henikoff, S. (2002). Conflict begets complexity: The evolution of centromeres.  
899 *Curr. Opin. Genet. Dev.* 12, 711–718. doi:10.1016/S0959-437X(02)00351-9.
- 900 Malik, H. S., and Henikoff, S. (2009). Major Evolutionary Transitions in Centromere  
901 Complexity. *Cell* 138, 1067–1082. doi:10.1016/j.cell.2009.08.036.
- 902 Martin, W. (2003). Gene transfer from organelles to the nucleus: frequent and in big chunks.  
903 *Proc. Natl. Acad. Sci. U. S. A.* 100, 8612–4. doi:10.1073/pnas.1633606100.
- 904 Maruyama, S., Matsuzaki, M., Kuroiwa, H., Miyagishima, S.-Y., Tanaka, K., Kuroiwa, T., et al.  
905 (2008). Centromere structures highlighted by the 100%-complete Cyanidioschyzon merolae  
906 genome. *Plant Signal. Behav.* 3, 140–1. doi:10.1186/1741-7007-5-28.140.
- 907 McKinley, K. L., and Cheeseman, I. M. (2016). The molecular basis for centromere identity and  
908 function. *Nat Rev Mol Cell Biol* 17, 16–29. doi:10.1038/nrm.2015.5.
- 909 Monaco, A. P., and Larin, Z. (1994). YACs, BACs, PACs and MACs: Artificial chromosomes as  
910 research tools. *Trends Biotechnol.* 12, 280–286. doi:10.1016/0167-7799(94)90140-6.
- 911 Murray, A. W., and Szostak, J. W. (1983). Construction of artificial chromosomes in yeast. *J.*  
912 *Chem. Inf. Model.* 305, 189–193. doi:10.1017/CBO9781107415324.004.
- 913 Nakaseko, Y., Adachi, Y., Funahashi, S., Niwa, O., and Yanagida, M. (1986). Chromosome  
914 walking shows a highly homologous repetitive sequence present in all the centromere  
915 regions of fission yeast. *EMBO J.* 5, 1011–21. Available at:  
916 [http://www.pubmedcentral.nih.gov/articlerender.fcgi?artid=1166895&tool=pmcentrez&ren](http://www.pubmedcentral.nih.gov/articlerender.fcgi?artid=1166895&tool=pmcentrez&rendertype=abstract)  
917 [dertype=abstract](http://www.pubmedcentral.nih.gov/articlerender.fcgi?artid=1166895&tool=pmcentrez&rendertype=abstract).
- 918 Neumann, P., Navrátilová, A., Schroeder-Reiter, E., Koblížková, A., Steinbauerová, V.,  
919 Chocholová, E., et al. (2012). Stretching the rules: Monocentric chromosomes with multiple



- 920 centromere domains. *PLoS Genet.* 8. doi:10.1371/journal.pgen.1002777.
- 921 Pluta, A. F., Mackay, A. M., Ainsztein, I. G., Goldberg, I. G., and Earnshaw, W. C. (1995). The  
922 Centromere: Hub of Chromosomal Activities. *Science (80-. )*. 270, 1591.
- 923 Price, N. M., Harrison, G. I., Hering, J. G., Hudson, R. J., Nirel, P. M. V., Palenik, B., et al.  
924 (1989). Preparation and Chemistry of the Artificial Algal Culture Medium Aquil. *Biol.*  
925 *Oceanogr.* 6, 443–461. doi:10.1080/01965581.1988.10749544.
- 926 Ravi, M., and Chan, S. W. L. (2010). Haploid plants produced by centromere-mediated genome  
927 elimination. *Nature* 464, 615–8. doi:10.1038/nature08842.
- 928 Rochaix, J. D., van Dillewijn, J., and Rahire, M. (1984). Construction and characterization of  
929 autonomously replicating plasmids in the green unicellular alga *Chlamydomonas reinhardtii*.  
930 *Cell* 36, 925–931. doi:10.1016/0092-8674(84)90042-4.
- 931 Sato, H., Masuda, F., Takayama, Y., Takahashi, K., and Saitoh, S. (2012). Epigenetic  
932 inactivation and subsequent heterochromatinization of a centromere stabilize dicentric  
933 chromosomes. *Curr. Biol.* 22, 658–667. doi:10.1016/j.cub.2012.02.062.
- 934 Smith, K. M., Galazka, J. M., Phatale, P. A., Connolly, L. R., and Freitag, M. (2012).  
935 Centromeres of filamentous fungi. *Chromosom. Res.* 20, 635–656. doi:10.1007/s10577-012-  
936 9290-3.
- 937 Stimpson, K. M., Matheny, J. E., and Sullivan, B. A. (2012). Dicentric chromosomes: Unique  
938 models to study centromere function and inactivation. *Chromosom. Res.* 20, 595–605.  
939 doi:10.1007/s10577-012-9302-3.
- 940 Sullivan, B. a, Blower, M. D., and Karpen, G. H. (2001). Determining centromere identity:  
941 cyclical stories and forking paths. *Nat. Rev. Genet.* 2, 584–596. doi:10.1038/35084512.
- 942 Sullivan, B. a, and Willard, H. F. (1998). Stable dicentric X chromosomes with two functional  
943 centromeres. *Nat. Genet.* 20, 227–228. doi:doi:10.1038/3024.
- 944 Timmis, J. N., Ayliffe, M. a, Huang, C. Y., and Martin, W. (2004). Endosymbiotic gene transfer:  
945 organelle genomes forge eukaryotic chromosomes. *Nat. Rev. Genet.* 5, 123–35.  
946 doi:10.1038/nrg1271.
- 947 Torras-Llort, M., Moreno-Moreno, O., and Azorín, F. (2009). Focus on the centre: the role of  
948 chromatin on the regulation of centromere identity and function. *EMBO J.* 28, 2337–2348.  
949 doi:10.1038/emboj.2009.174.
- 950 Tyler-Smith, C., Oakey, R., Z., L., Fisher, R., Crocker, M., Affara, N., et al. (1993). Localisation  
951 of DNA sequences requires for human centromere function through an analysis of  
952 rearranges Y chromosomes. *Nat. Genet.* 5, 368–375.
- 953 Wada, N., Kazuki, Y., Kazuki, K., Inoue, T., Fukui, K., and Oshimura, M. (2016). Maintenance  
954 and Function of a Plant Chromosome in Human Cells. *ACS Synth. Biol.*,  
955 acssynbio.6b00180. doi:10.1021/acssynbio.6b00180.
- 956 Wang, G., Li, H., Cheng, Z., and Jin, W. (2013). A novel translocation event leads to a  
957 recombinant stable chromosome with interrupted centromeric domains in rice. *Chromosoma*  
958 122, 295–303. doi:10.1007/s00412-013-0413-1.
- 959 Westermann, S., Cheeseman, I. M., Anderson, S., Yates, J. R., Drubin, D. G., and Barnes, G.  
960 (2003). Architecture of the budding yeast kinetochore reveals a conserved molecular core.  
961 *J. Cell Biol.* 163, 215–222. doi:10.1083/jcb.200305100.
- 962 Westhorpe, F. G., Straight, A. F., Varetto, G., Pellman, D., David, J., and Cheeseman, I. M.  
963 (2014). The Centromere: Epigenetic Control of Chromosome Segregation during Mitosis.  
964 *Cold Spring Harb. Perspect. Biol.* 7, 1–26. doi:a015818.
- 965 Willard, H. F. (1998). Centromeres: The missing link in the development of human artificial

- 966 chromosomes. *Curr. Opin. Genet. Dev.* 8, 219–225. doi:10.1016/S0959-437X(98)80144-5.  
967 Yu, W., Yau, Y., and Birchler, J. A. (2016). Plant artificial chromosome technology and its  
968 potential application in genetic engineering. *Plant Biotechnol. J.* 14, 1175–82.  
969 doi:10.1111/pbi.12466.  
970 Zhang, W., Friebe, B., Gill, B. S., and Jiang, J. (2010). Centromere inactivation and epigenetic  
971 modifications of a plant chromosome with three functional centromeres. *Chromosoma* 119,  
972 553–563. doi:10.1007/s00412-010-0278-5.  
973

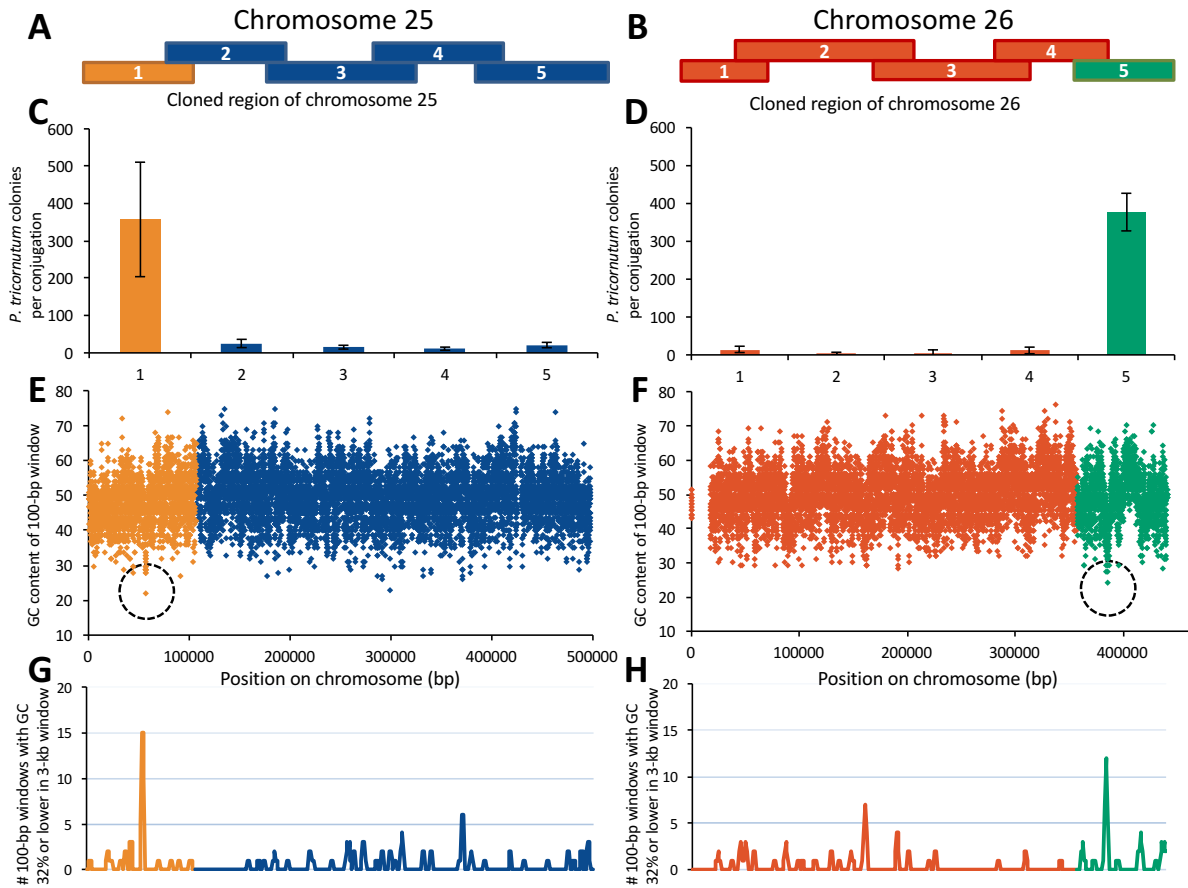

**Figure 1: Regions of *P. tricornutum* chromosomes enriched for low GC support episomal maintenance.** **A and B.** Chromosomes 25 and 26 were cloned as 5 overlapping ~100-kb fragments. **C and D.** Number of resulting *P. tricornutum* colonies per conjugation for episomes containing indicated region of chromosome 25 or 26. Error bars indicate standard deviation of four independent conjugation reactions for each fragment. **E and F.** GC content was calculated for chromosomes 25 and 26 in 100-bp sliding windows that overlapped by 50 bp. Dashed circles indicate the lowest GC content for the chromosome in a 100-bp window. **G and H.** Number of 100-bp windows with GC content of 32% or lower within a larger sliding 3-kb window that advanced by 1 kb each step.

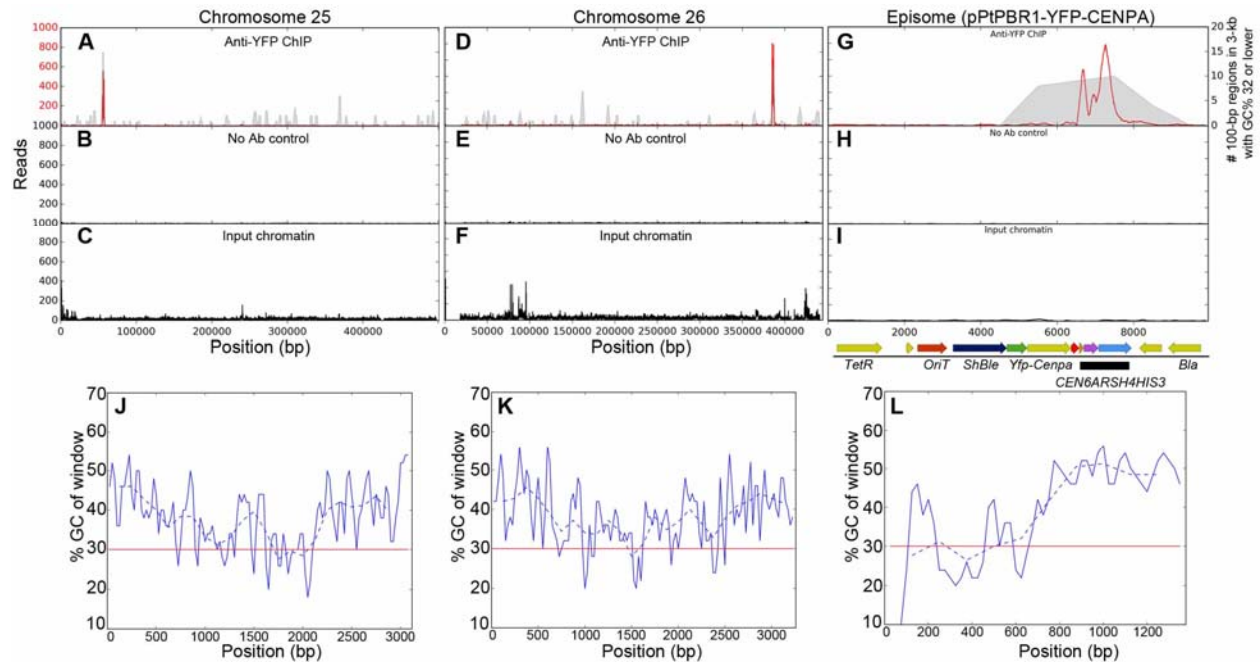

**Figure 2: ChIP-seq and GC data for chromosomes 25, 26, and the episome.** For each of chromosomes 25, 26, and the episome, ChIP-seq reads at each position for treatments with the YFP antibody (red) were plotted on the same graph as the number of 100-bp windows with GC 32% or lower in a larger 3-kb window (gray) (**A, D, G**). Graphs of the number of reads for the no-antibody ChIP-seq control (**B, E, H**) and input chromatin (**C, F, I**) were plotted using the same position scale as the anti-YFP ChIP-seq. For the episome, the positions of the genetic features are indicated below the input chromatin (the black bar indicates the *CEN6-ARSH4-HIS3* region). **J, K, L.** For the peaks identified by the CENP-A-YFP ChIP-seq in chromosomes 25, 26, and the episome, GC content for 100-bp windows (50 bp overlap, solid blue line) or 250-bp windows (125-bp overlap, dashed blue line) was plotted with a reference line at 30% in red.



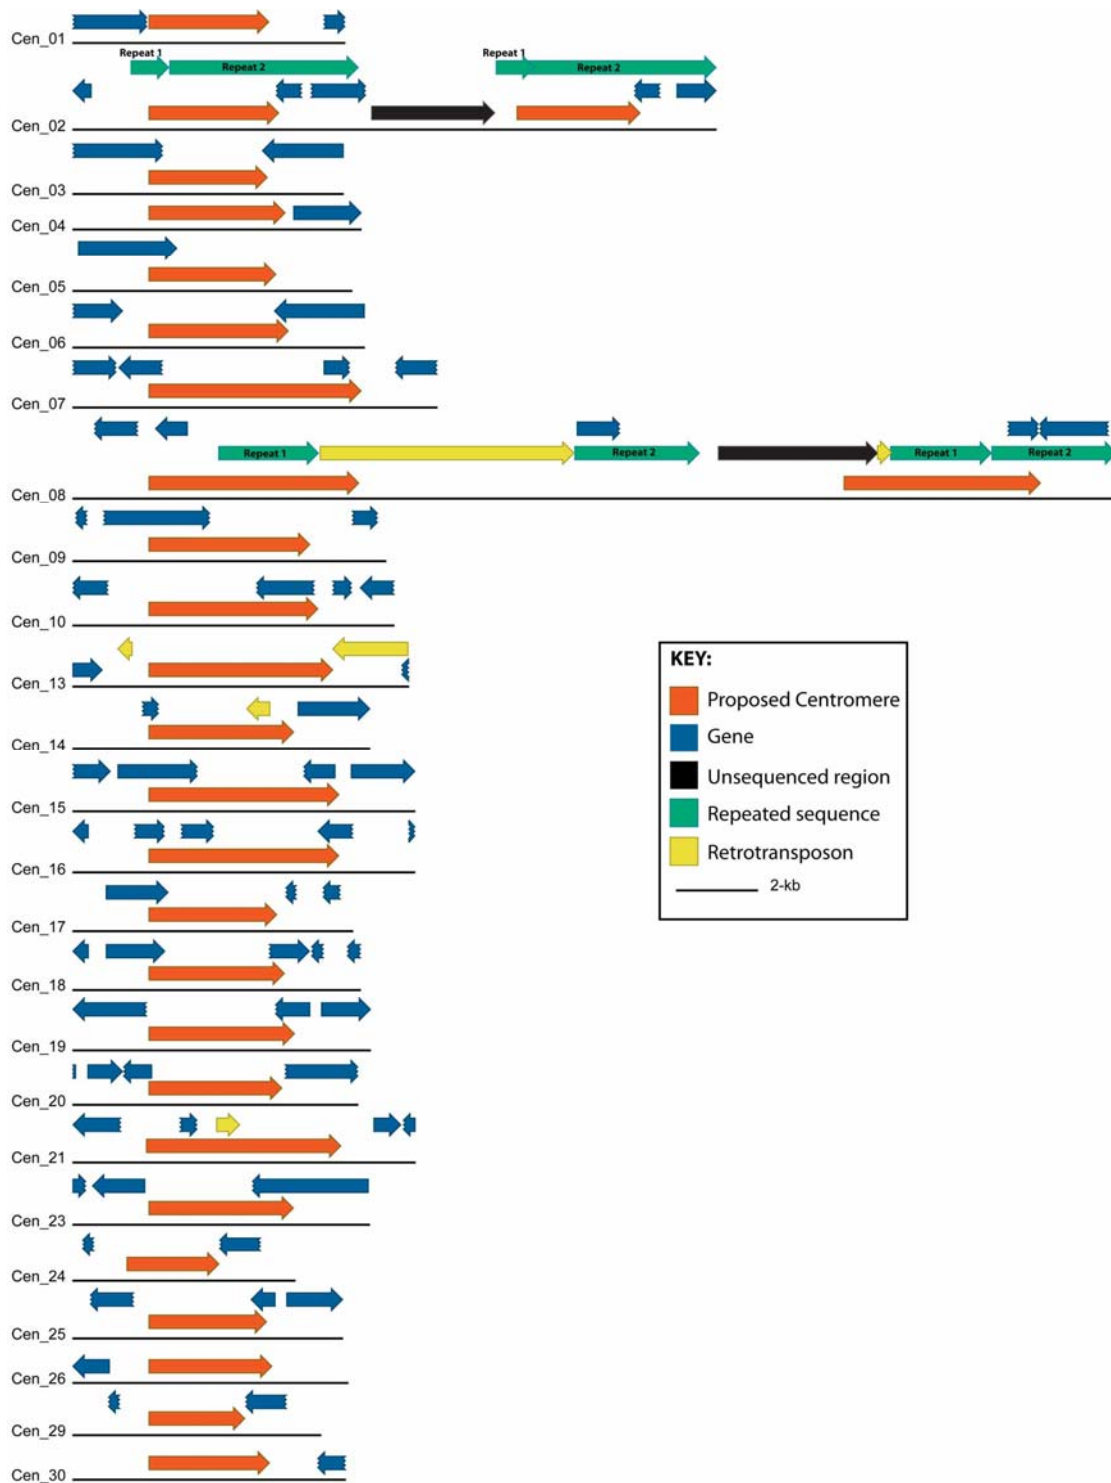

**Figure 3: Location and genomic features of all *P. tricornutum* centromeres identified in chromosomal scaffolds.** Centromeres identified by ChIP-seq (crimson) are plotted along with PHATR2 gene models (blue) for the regions spanning 2-kb upstream and 2-kb downstream of the annotated centromere regions (See Supplementary Table 3 for centromere genomic coordinates). For chromosomes 2 and 8, large direct repeated regions (teal) are plotted with regions of unresolved sequence (black) and retrotransposon annotations (yellow). Scale bar, 2-kb, noted in legend.

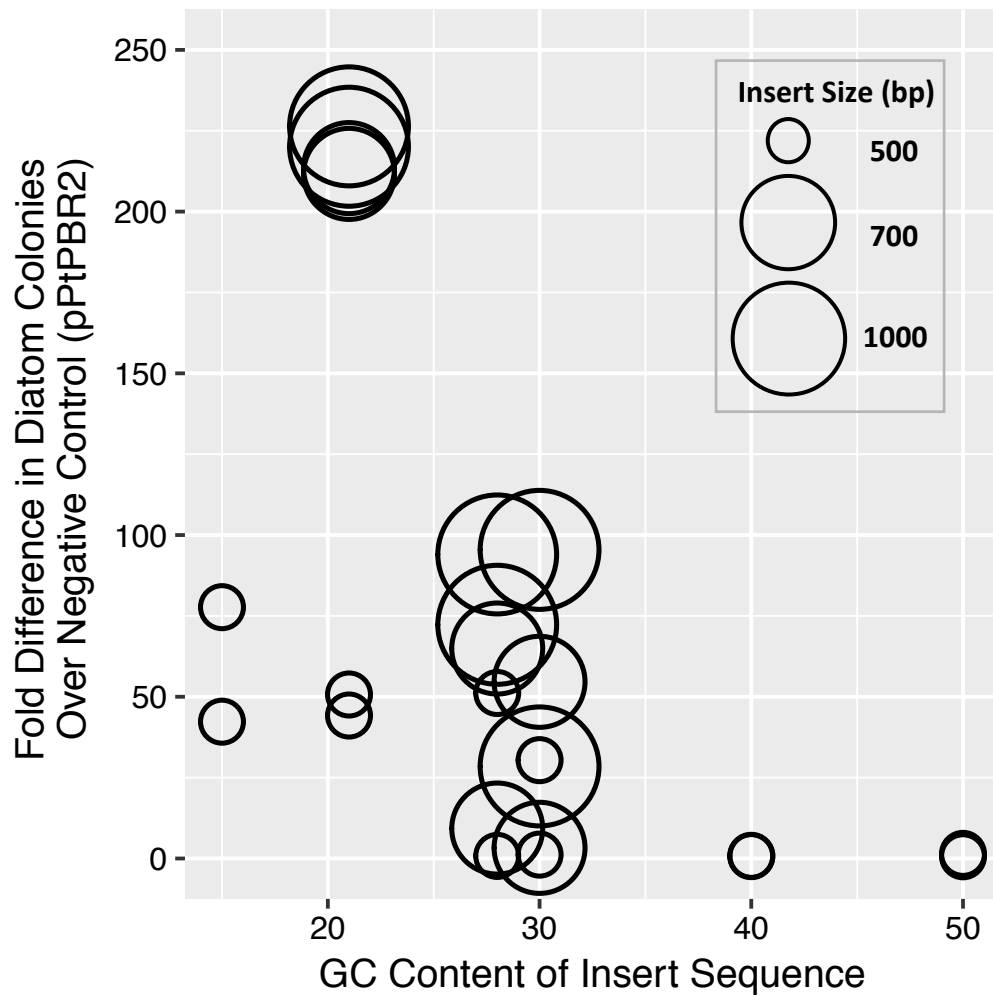

**Figure 4: Maintenance of episomes containing *Mycoplasma mycoides* DNA sequences.** GC content of *M. mycoides* DNA sequences tested for maintenance ability and number of diatom ex-conjugant colonies obtained after conjugation shown as fold increase in colony numbers over the pPtPBR2 negative control. The size of each circle represents the size of the insert sequence tested: large circles = 1000 bp, medium circles = 700 bp, and small circles = 500 bp.

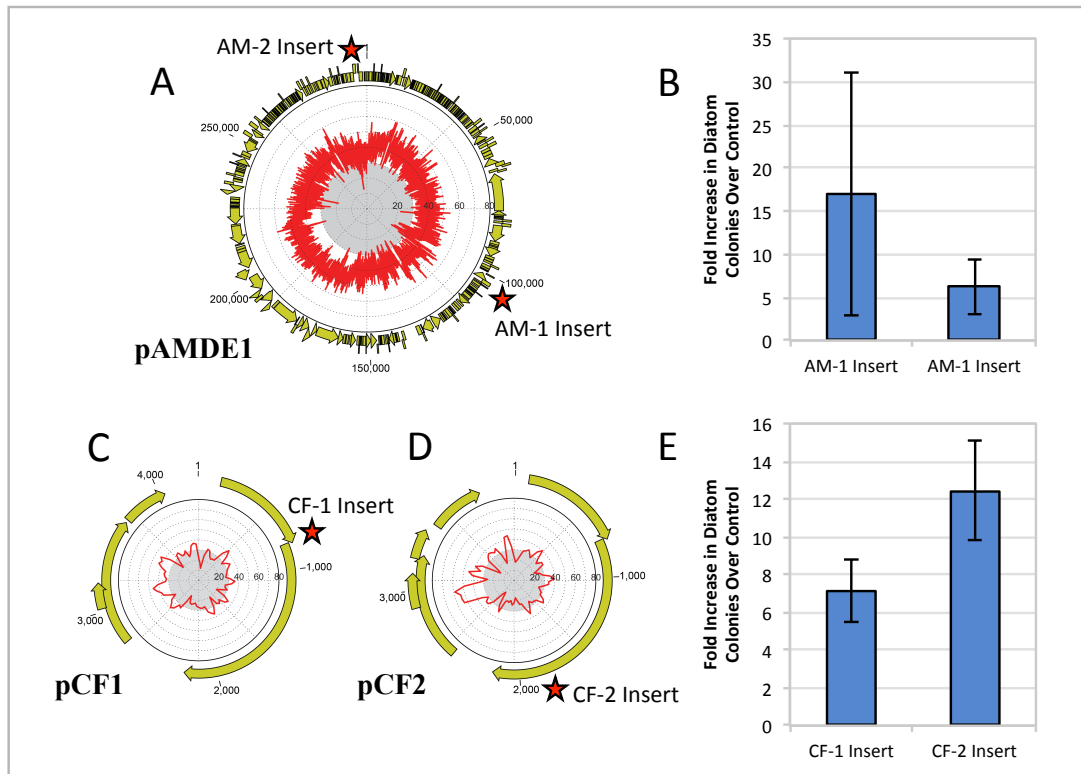

**Figure 5: Maintenance of episomes containing *A. macleodii* and *C. fusiformis* DNA sequences.**

**A.** Map of the *Alteromonas macleodii* plasmid pAMDE1 with GC content mapped on the interior. Stars (\*AM-1 Insert or \*AM-2 Insert) represent the regions used to test episome maintenance in plasmid pPtPBRAM-1 and pPtPBRAM-2, respectively. GC content was calculated for 100-bp windows that overlapped by 50-bp, and GC content below 30% in the plasmid figures is indicated by the central gray shaded circle. **B.** Ex-conjugant colony yield from conjugation of AM-1 and AM-2 Inserts, shown as fold increase in colony numbers over the pPtPBR2 negative control. Error bars show standard deviation from three biological replicates. **C.** Map of the *Cylindrotheca fusiformis* plasmid pCF1, \*CF-1 Insert represents the region used to test episome maintenance in plasmid pPtPBR-CF1. **D.** Map of the *Cylindrotheca fusiformis* plasmid pCF2, \*CF-2 Insert represents the region used to test episome maintenance in plasmid pPtPBRCF-2. **E.** Ex-conjugant colony yield from conjugation of episomes containing CF-1 and CF-2 Inserts are shown as fold increase in colony numbers over the pPtPBR2 negative control. Error bars show standard deviation from three biological replicates.

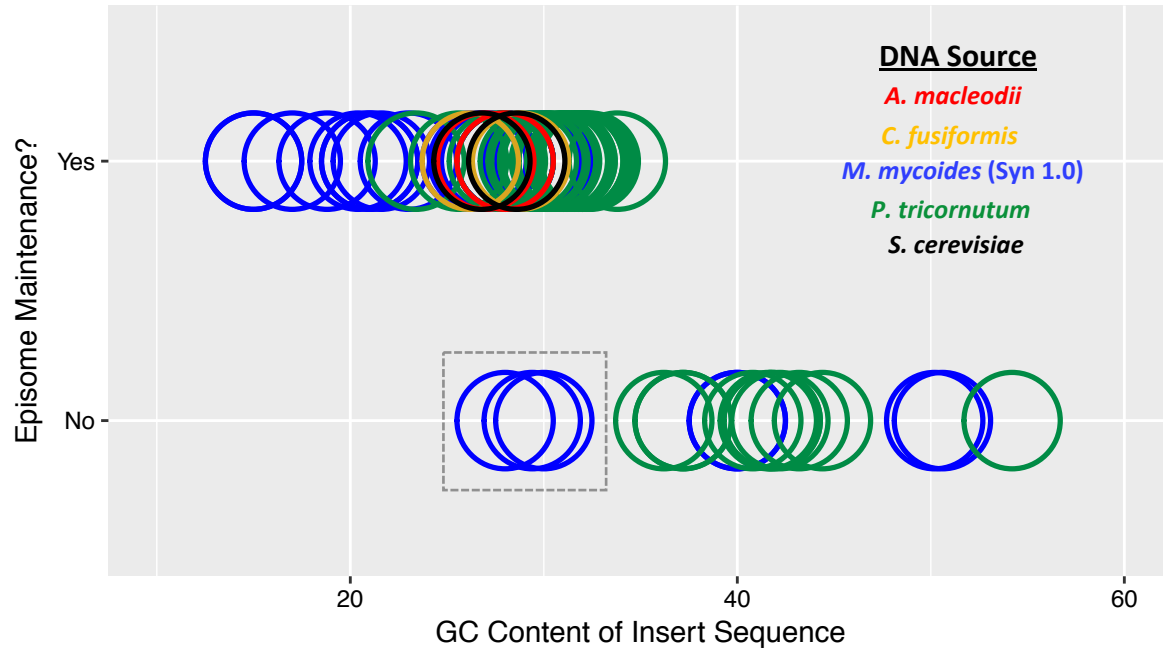

**Figure 6: Relationship between GC content and episome maintenance.** The 500-bp sub-region with the lowest GC content was identified for each insert sequence in the *P. tricornutum* Test series (which includes ChIP-seq peaks, forward genetic library sequences, designed negative controls, and potential ChIP-seq artifacts) and foreign DNA inserts (including *M. mycoides*, *C. fusiformis*, and *A. macleodii* plasmid pAMDE1 source DNA). See Supplementary Table 5 for data included in the figure. This lowest GC content sub-region was plotted as a function of whether the DNA could support episomal maintenance in *P. tricornutum*. DNA sequences are colored by the organism from which each insert sequence originated.





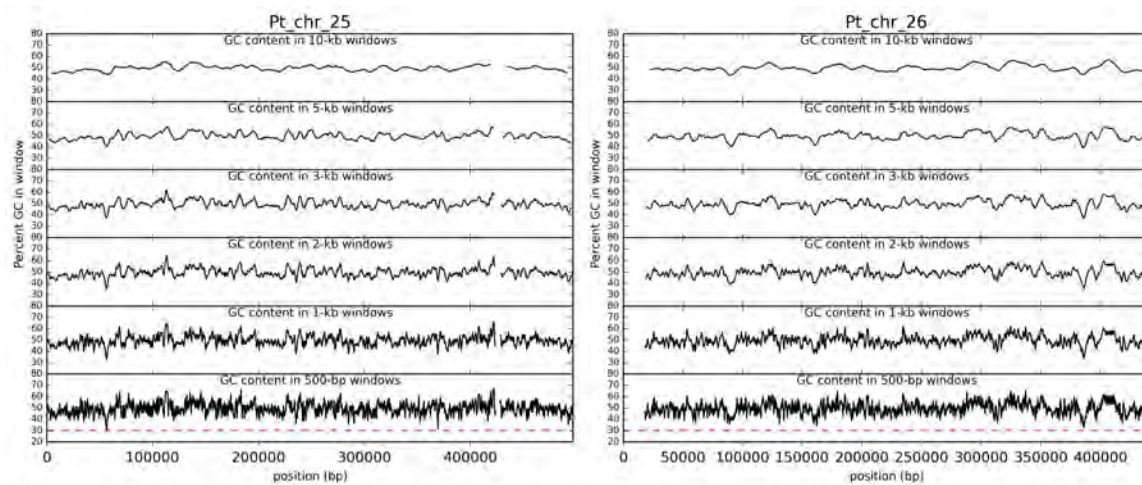

**Supplementary Figure 1:** GC content of *P. tricornutum* chromosome 25 and 26 scaffolds using sliding window sizes of 10-, 5-, 3-, 2-, 1-, and 0.5-kb. Breaks in the lines indicate the presence of unknown sequence within the window. A reference dashed line at 30% is drawn for the 0.5-kb plots.

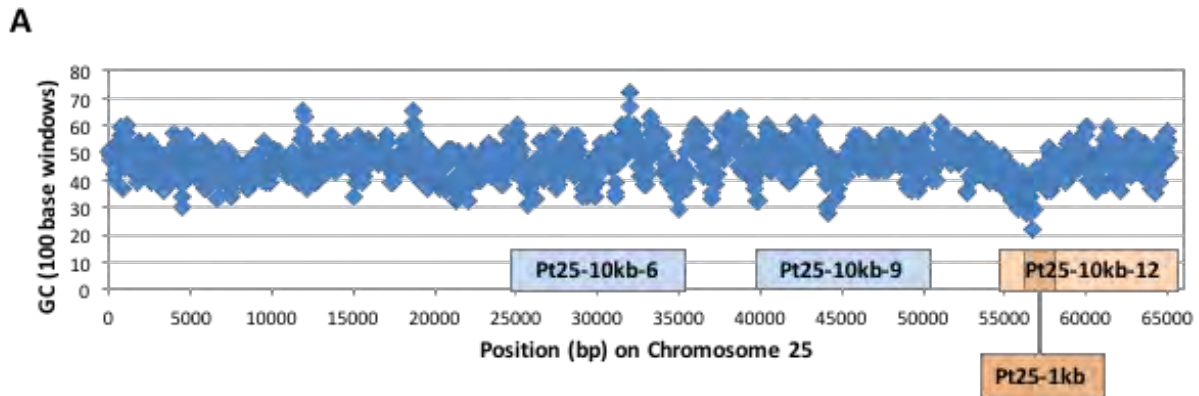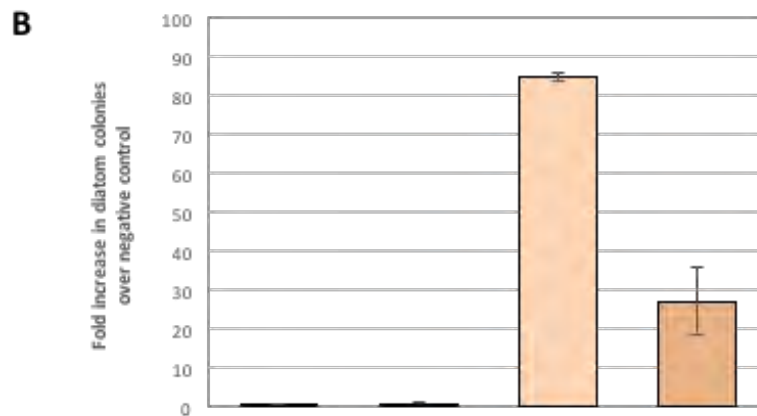

**Supplementary Figure 2:** Regions of *Phaeodactylum tricornutum* chromosome 25 that support episomal maintenance. **A.** Enlargement of chromosome 25 from 1-65,000 bp showing GC content in 100-bp windows overlapping by 50-bp, overlaid with the *P. tricornutum* DNA inserts tested (Pt25-10kb-6, Pt25-10kb-9, Pt25-10kb-12, and Pt25-1kb). **B.** Number of diatom ex-conjugant colonies obtained after conjugation, shown as fold increase in colony numbers over the pPtPBR2 negative control.

**Supplementary Figure 3:** GC data and ChIP-seq data for all chromosome scaffolds, chloroplast and mitochondrion genomes, and bottom drawer non-scaffolded assemblies. The following four data series were plotted for each sequence: 1) Low GC features plotted as the number of 100-bp windows with GC 32% or lower within a larger 3-kb window that advanced by 1-kb each step, 2) ChIP-seq reads for anti-YFP treatment, 3) no antibody ChIP-seq reads, and 4) input chromatin reads for ChIP-seq experiment.



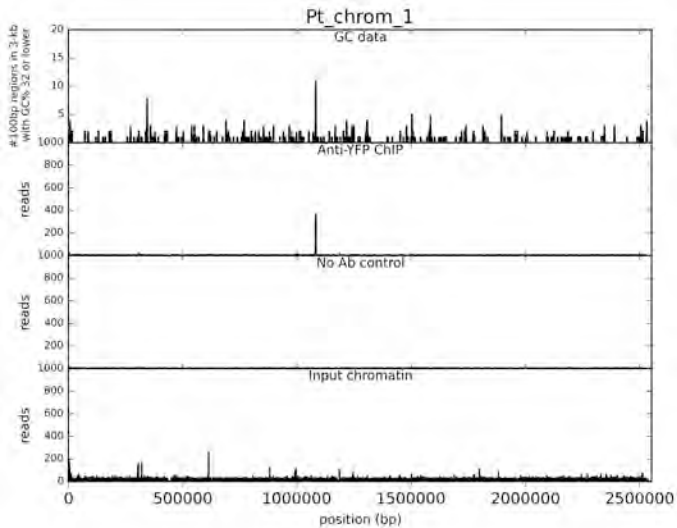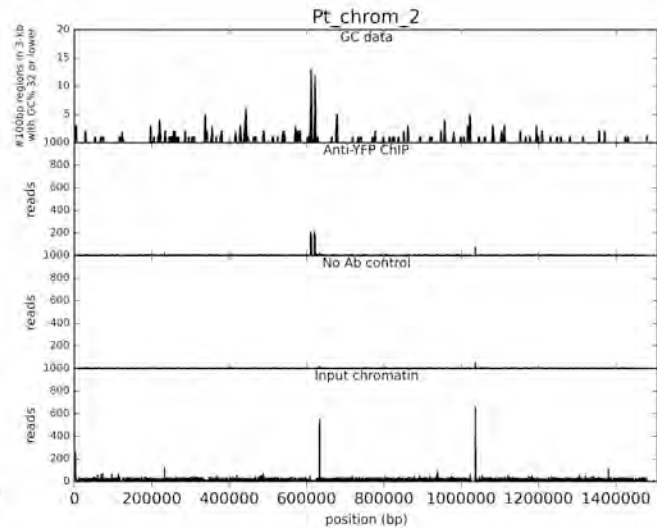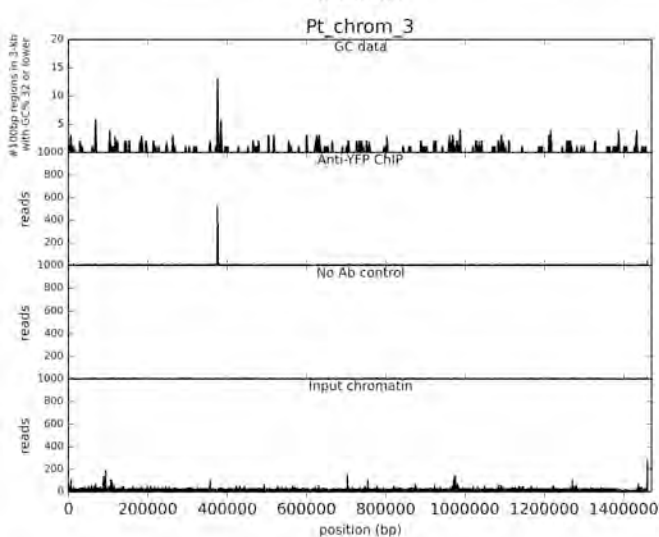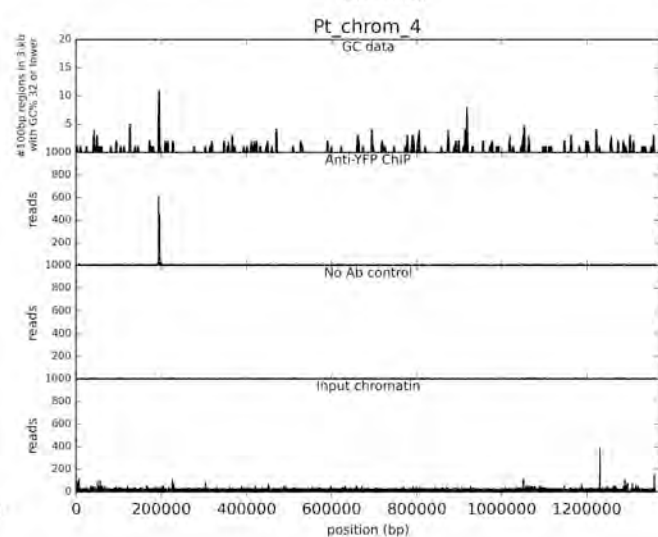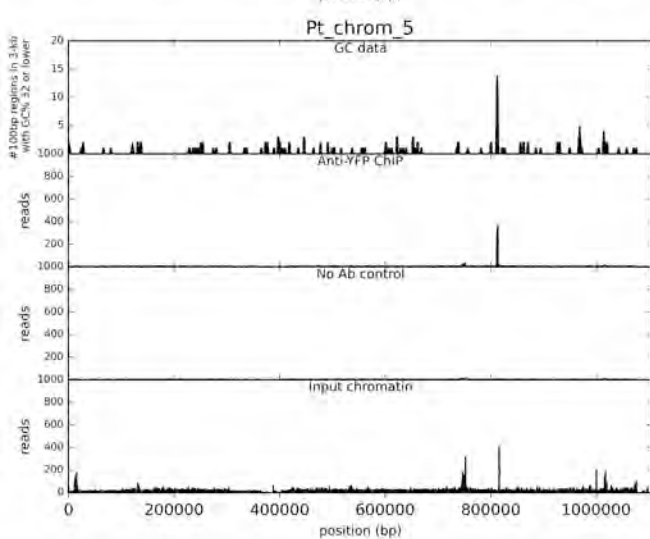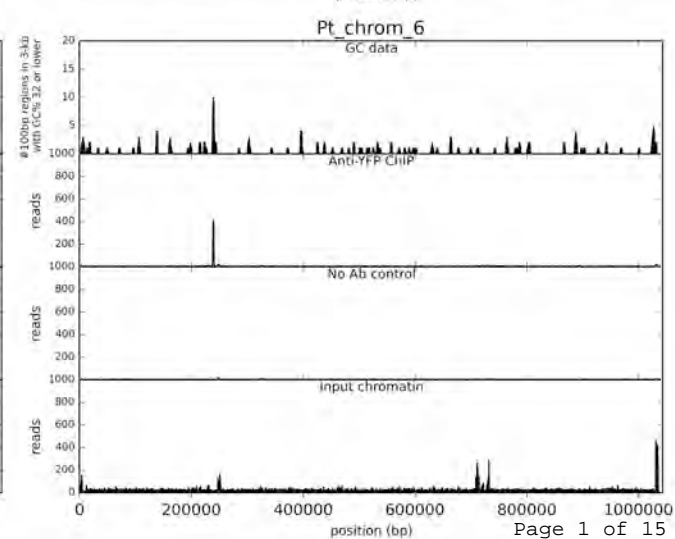

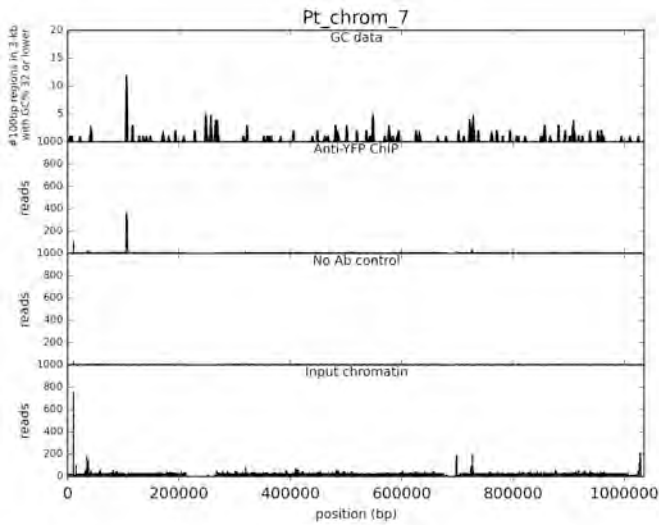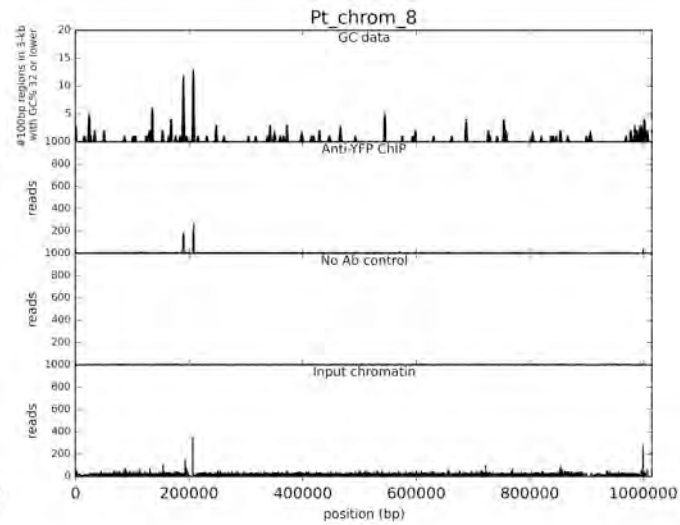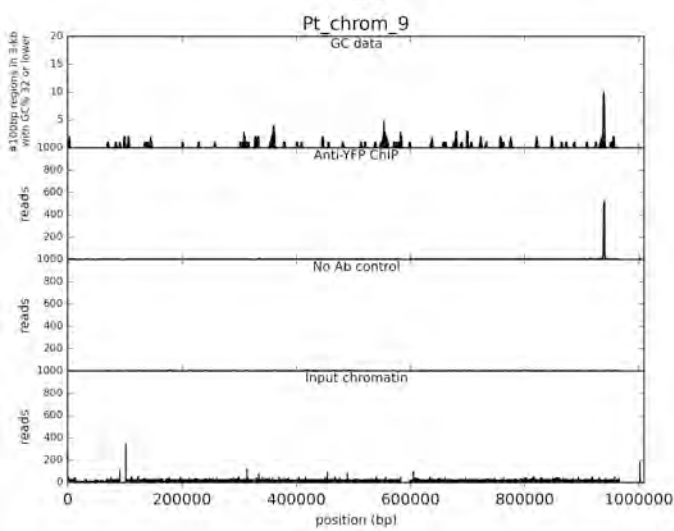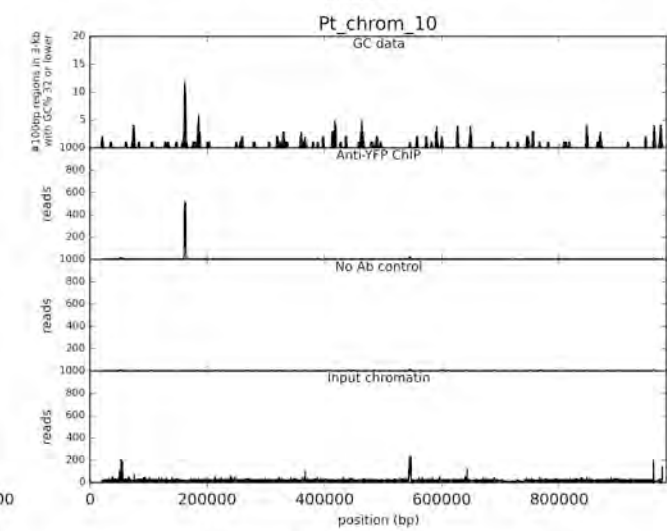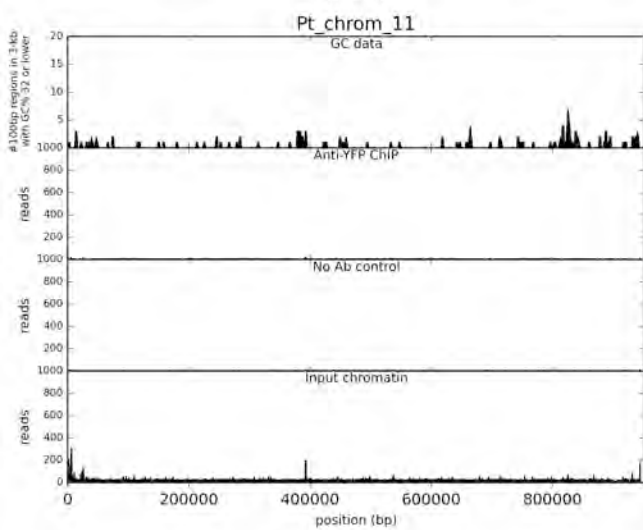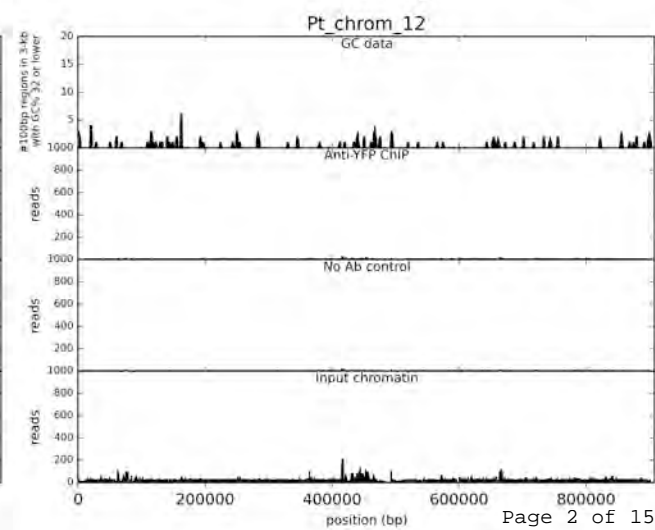

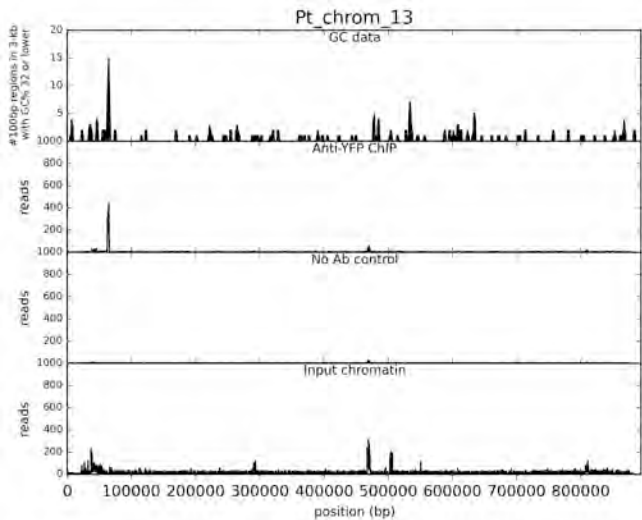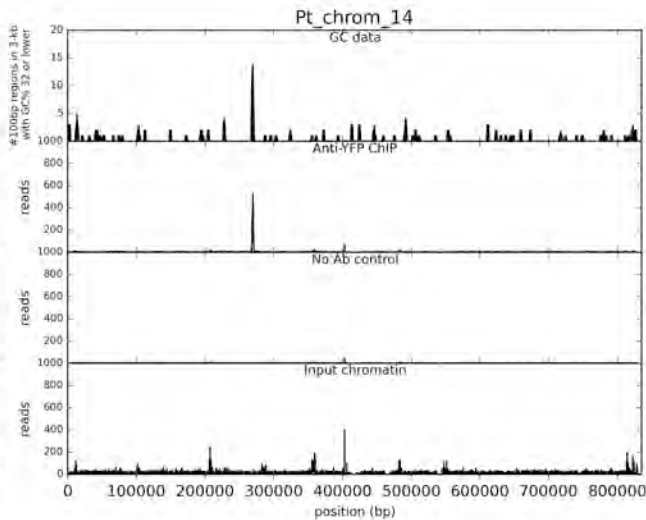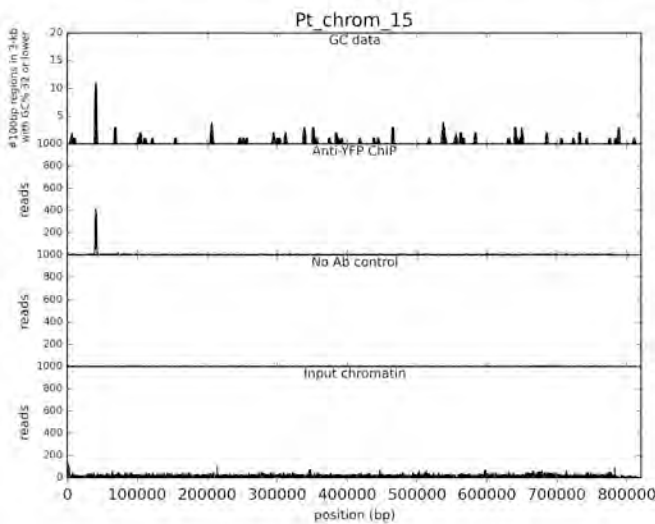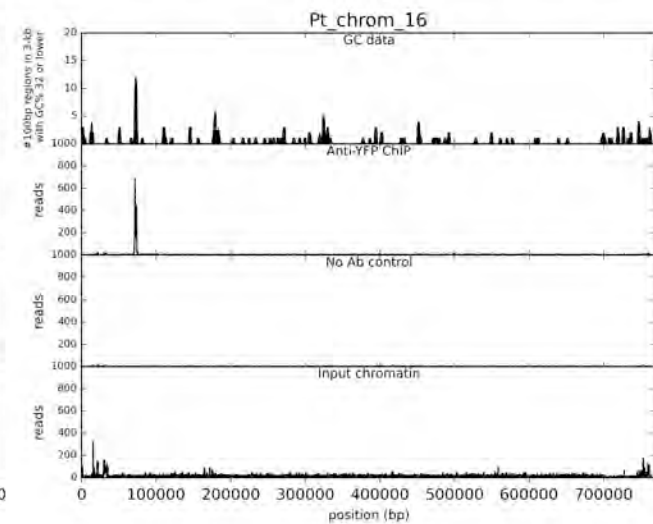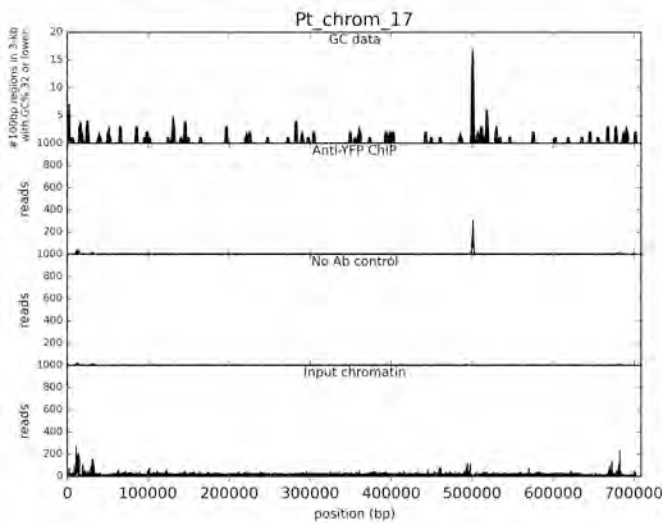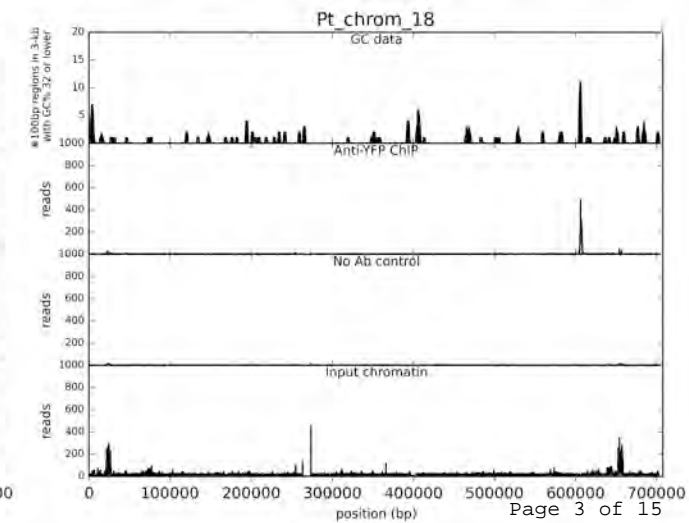

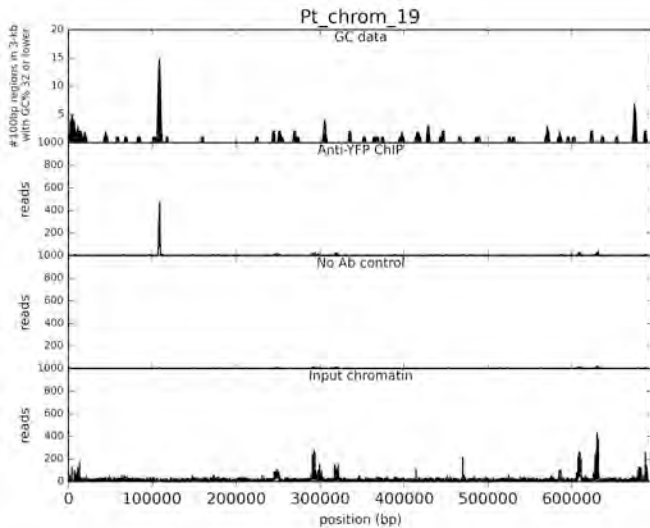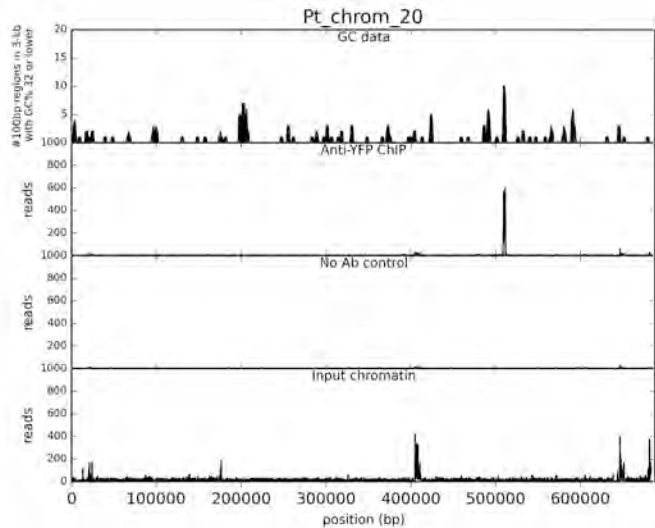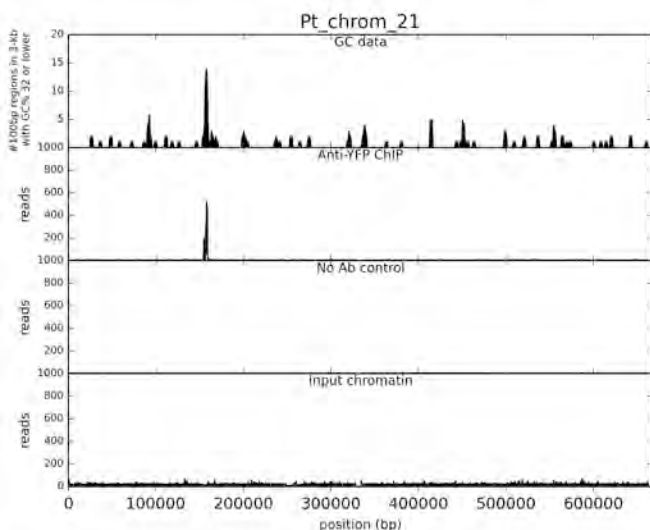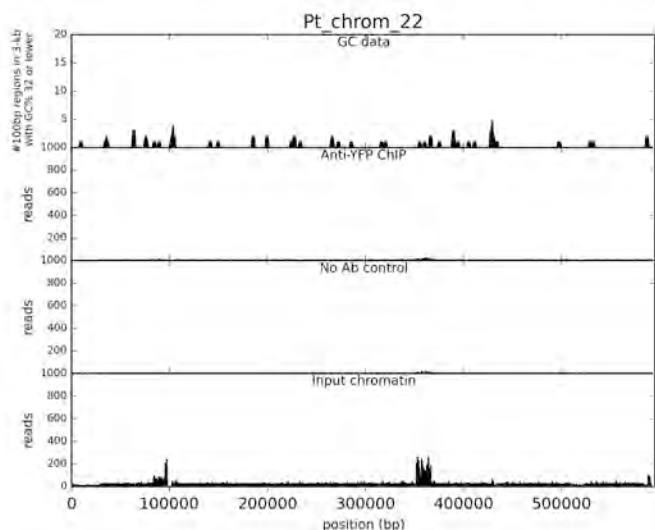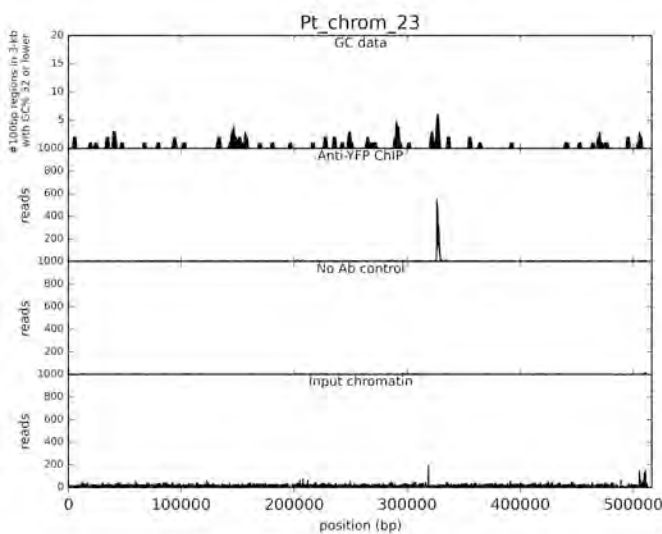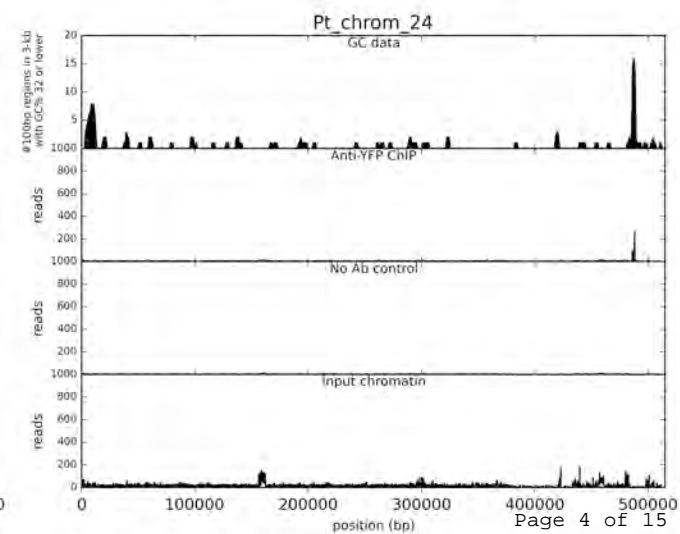



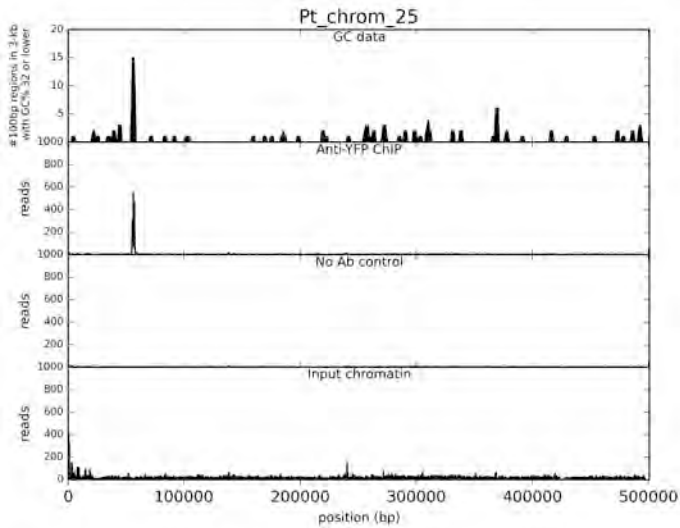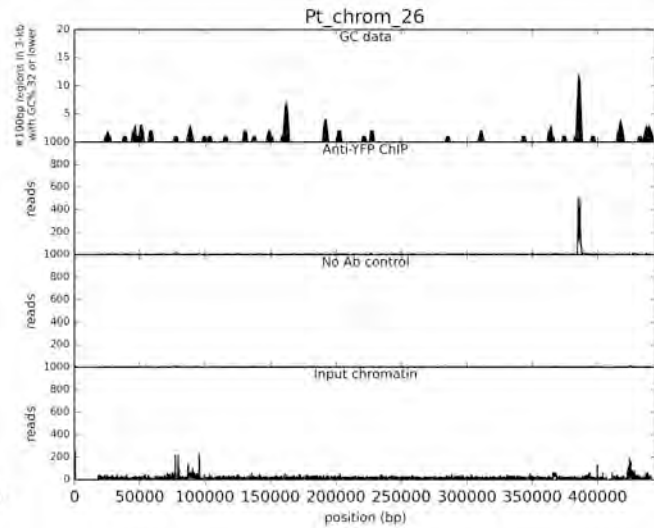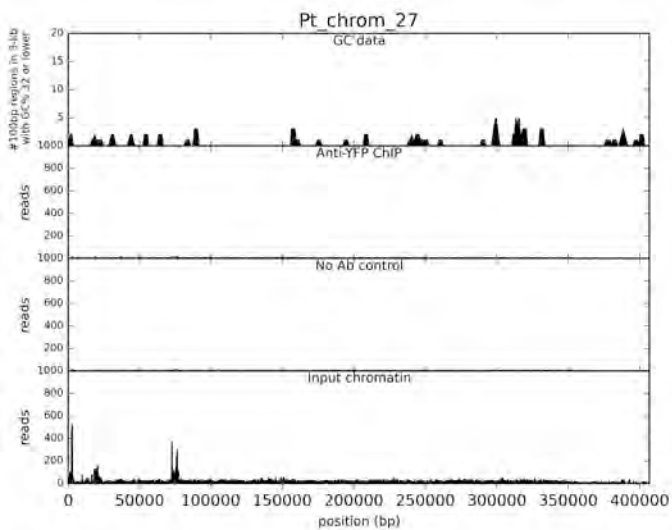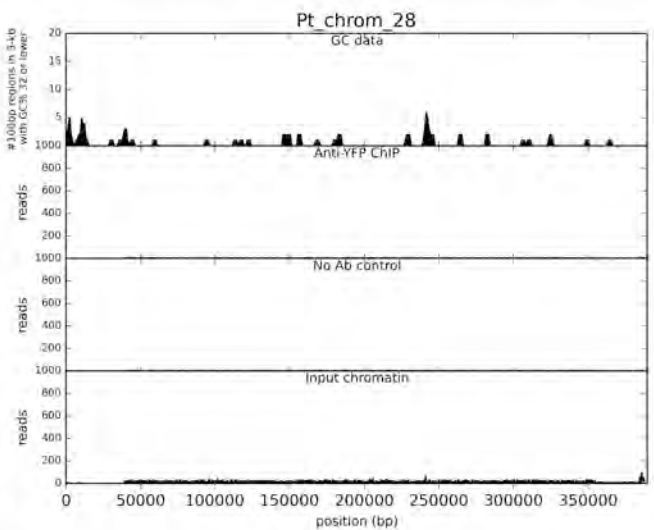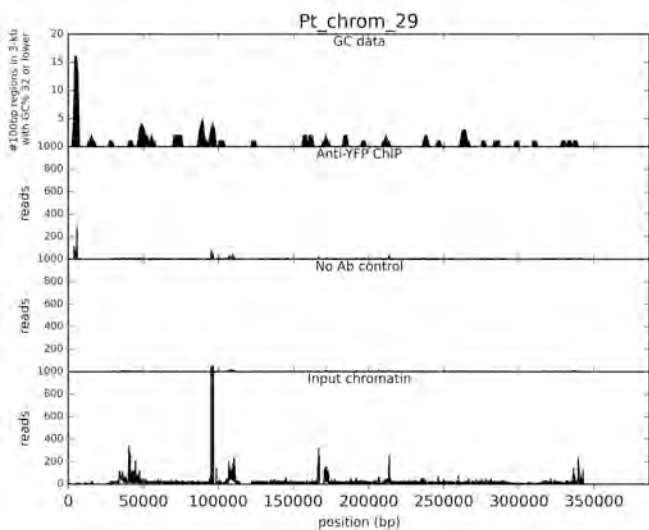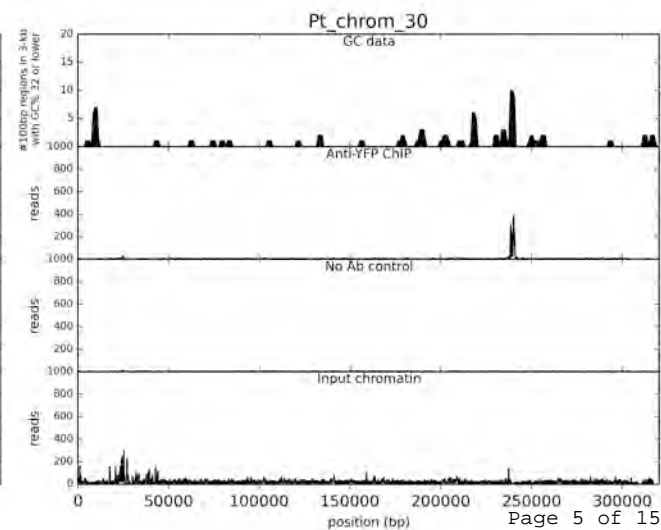

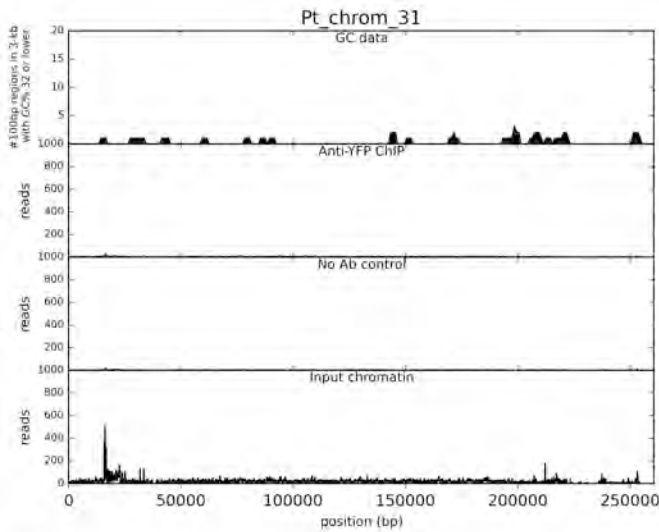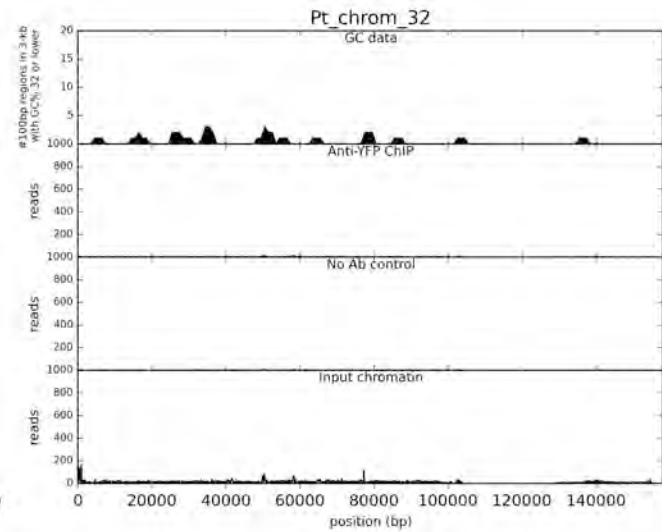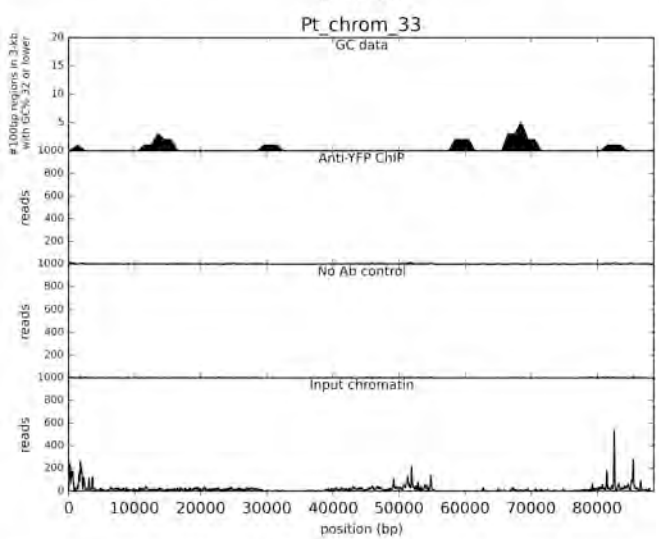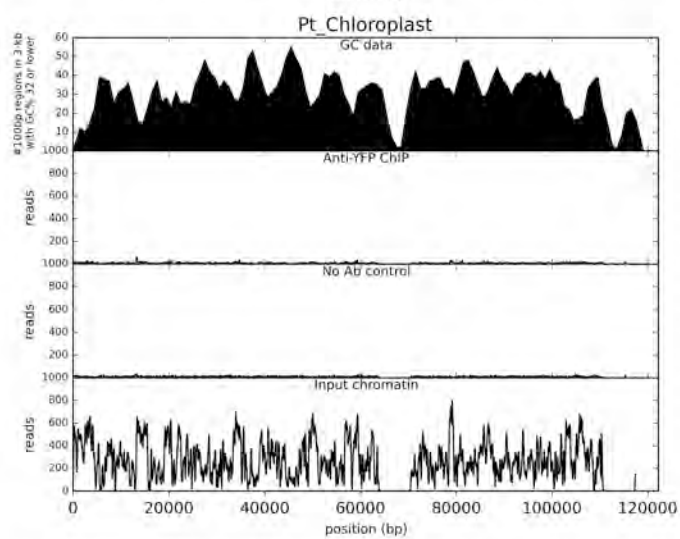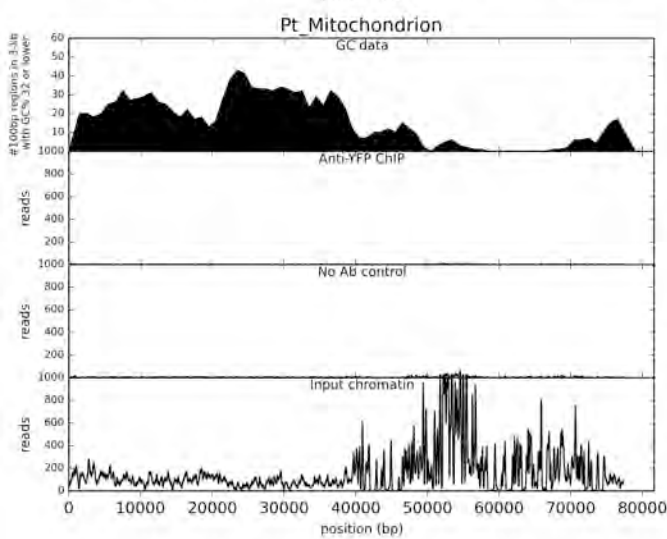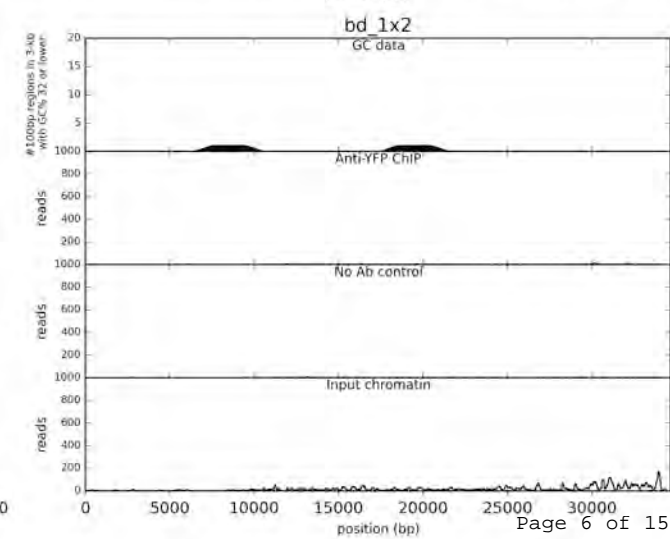

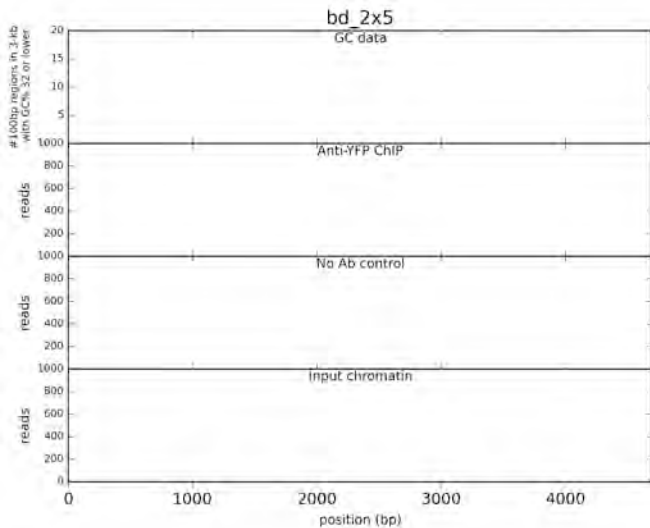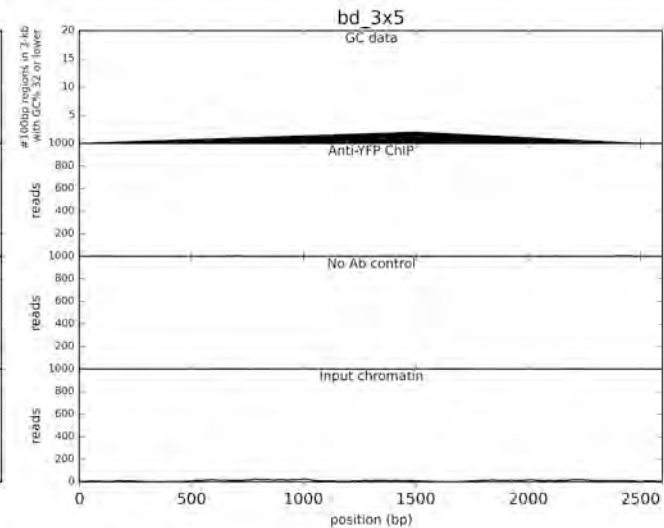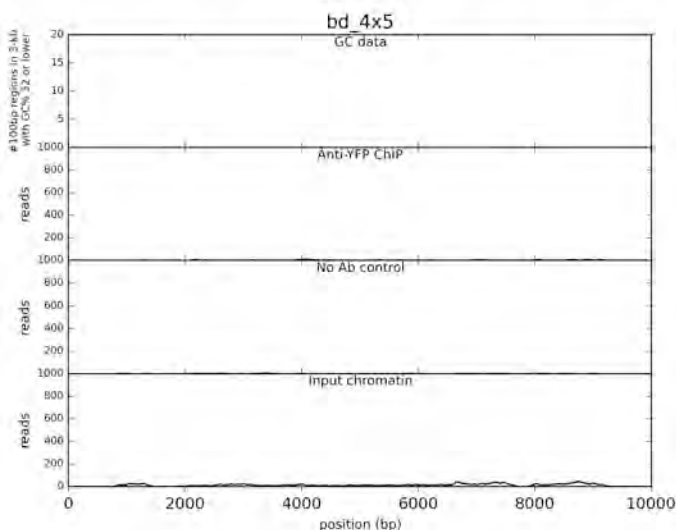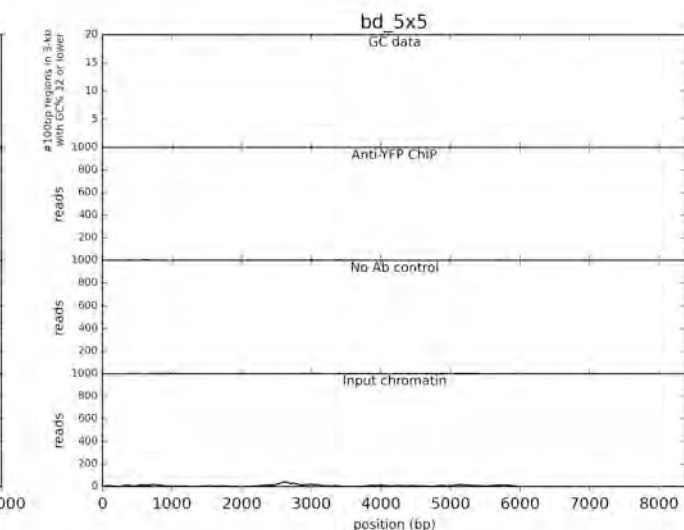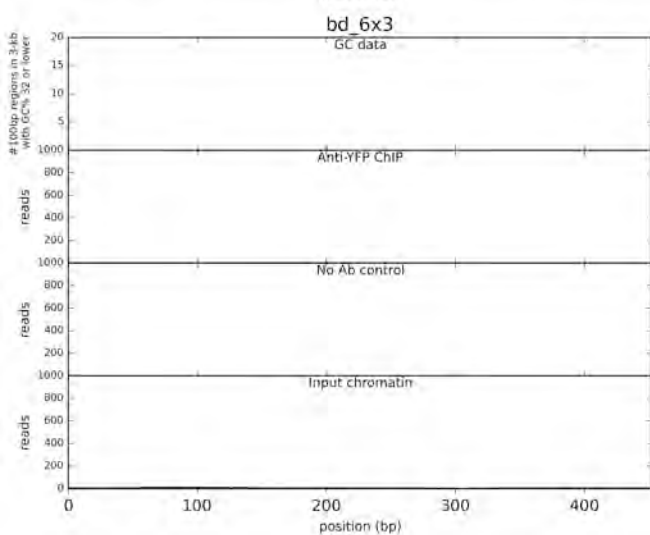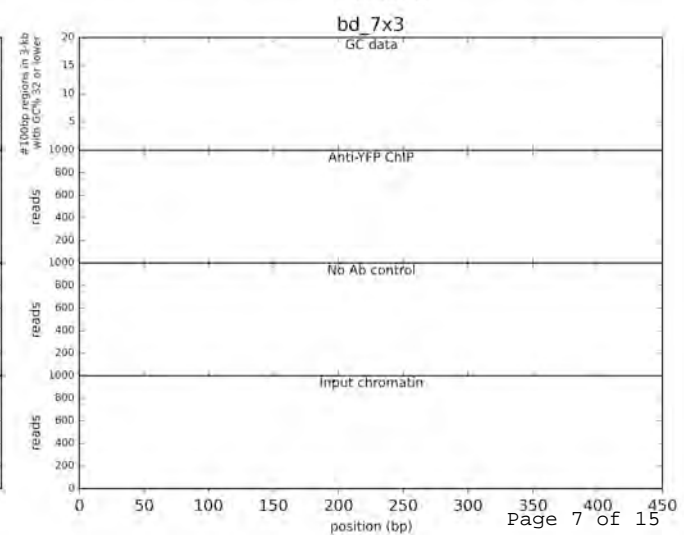

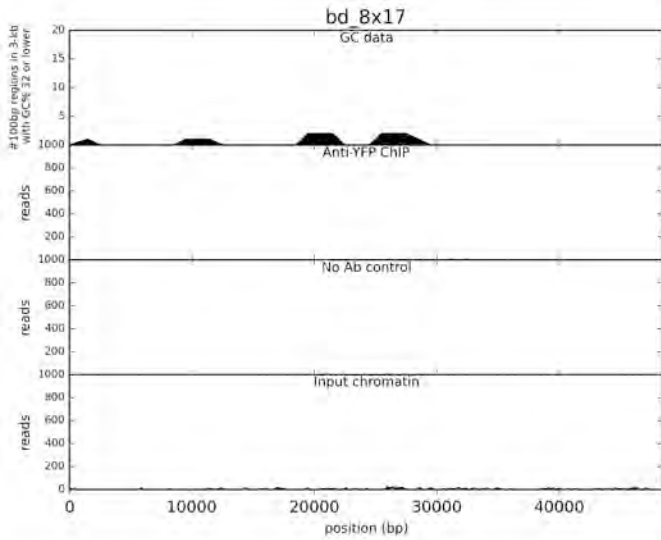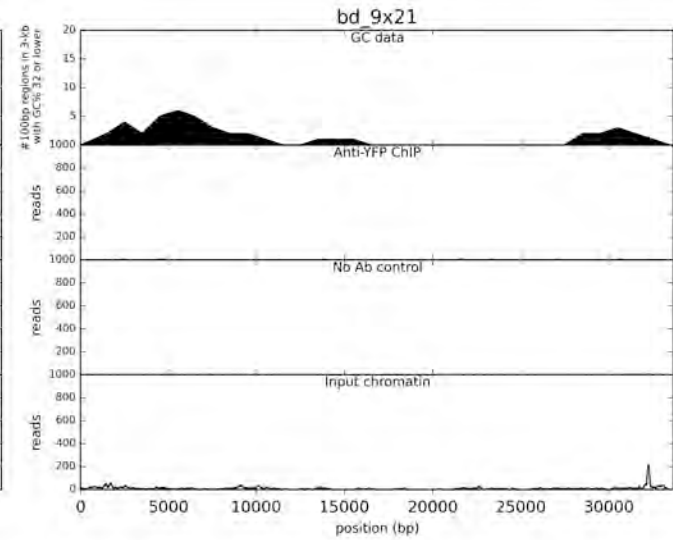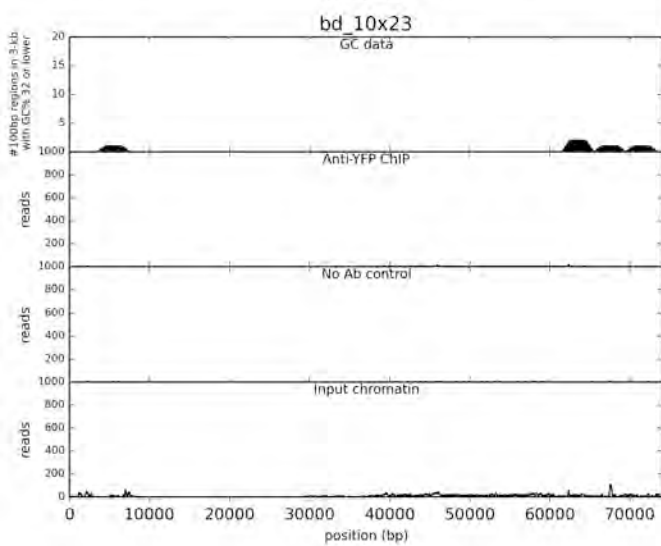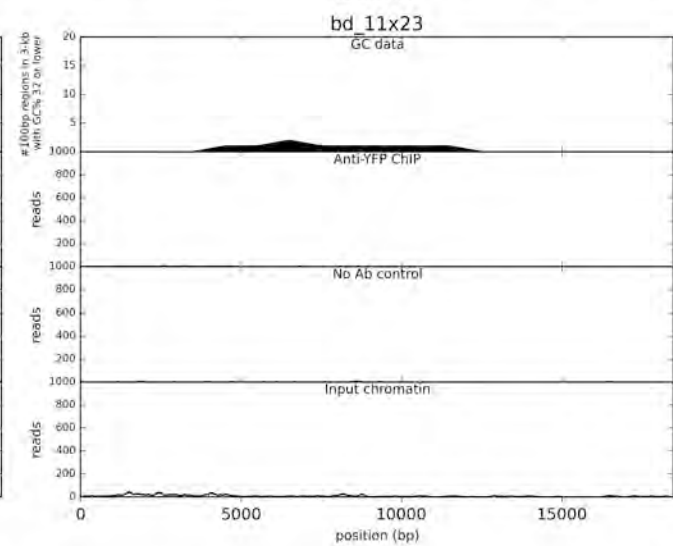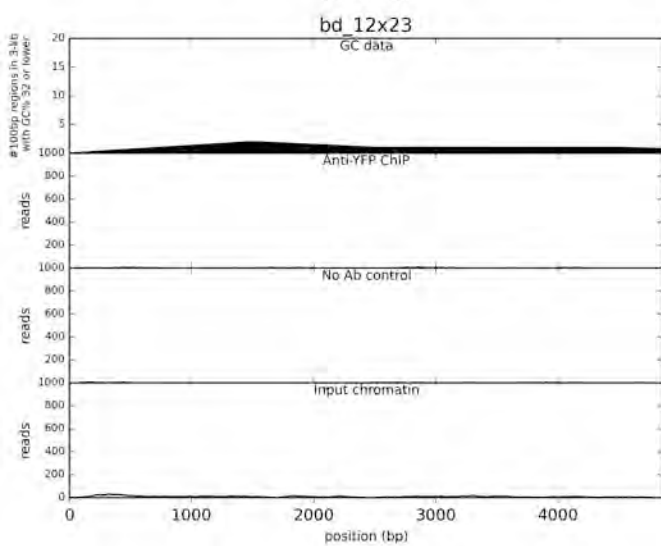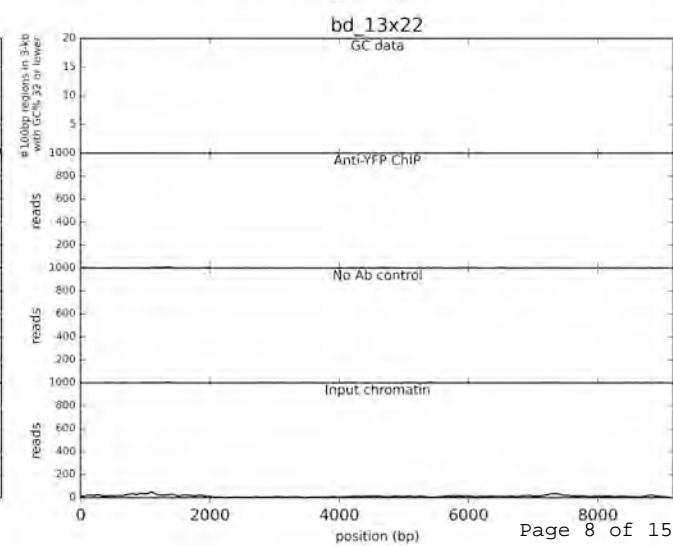

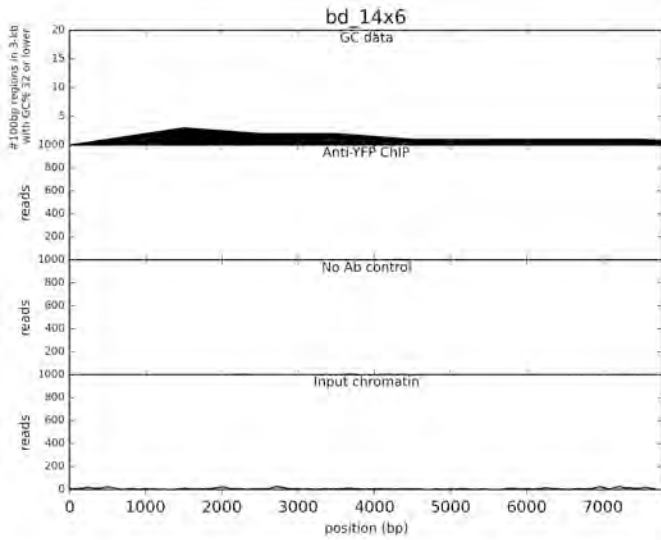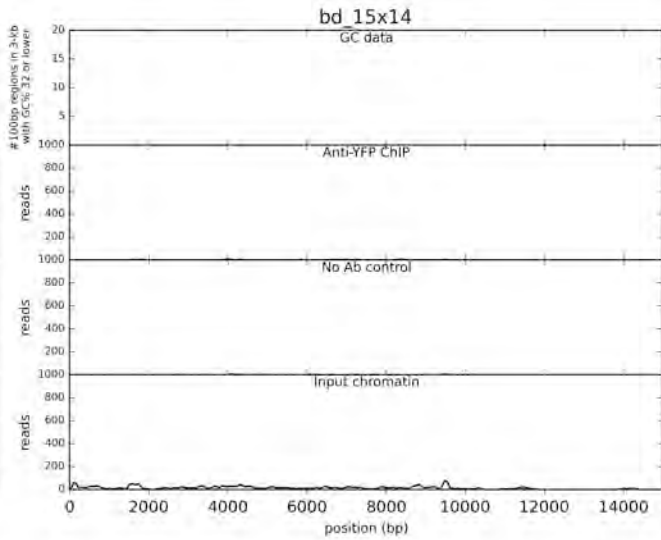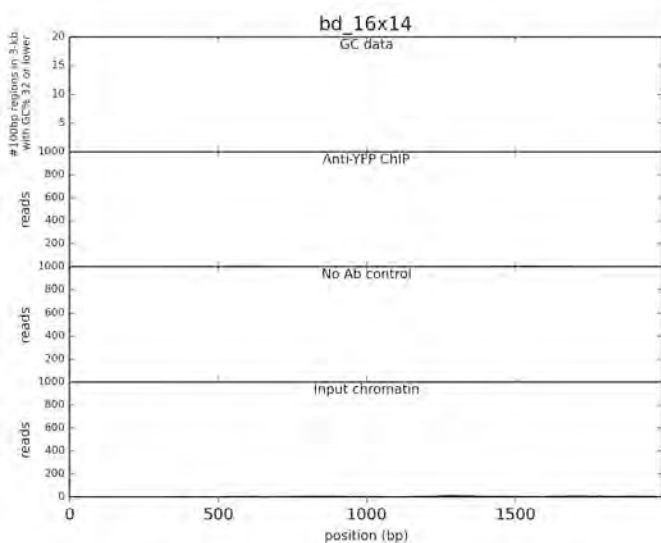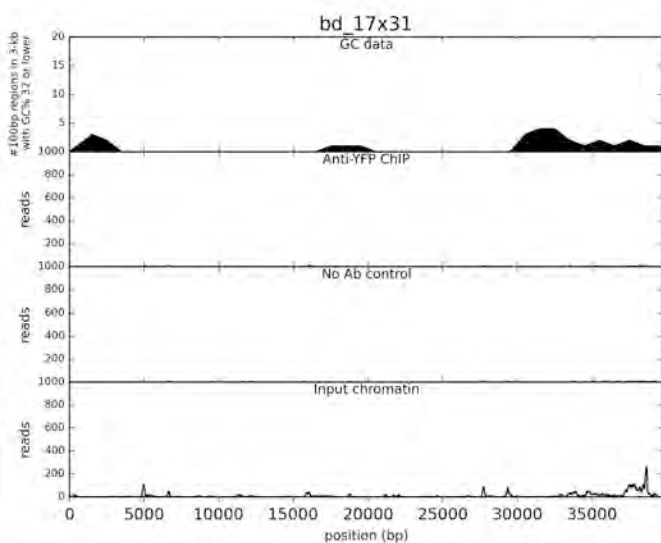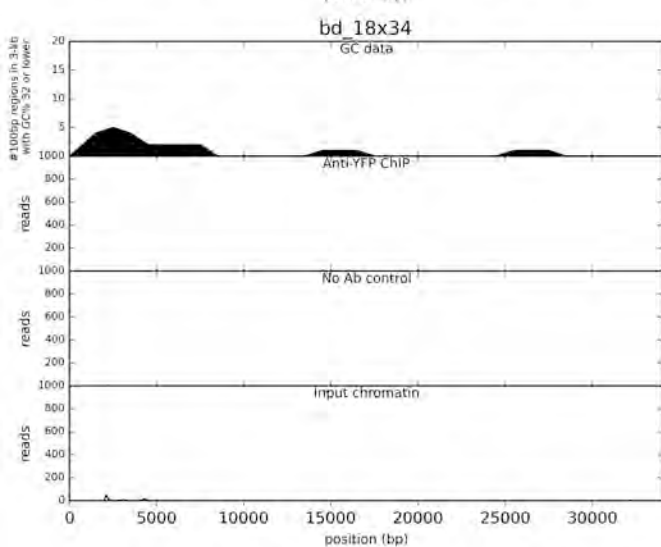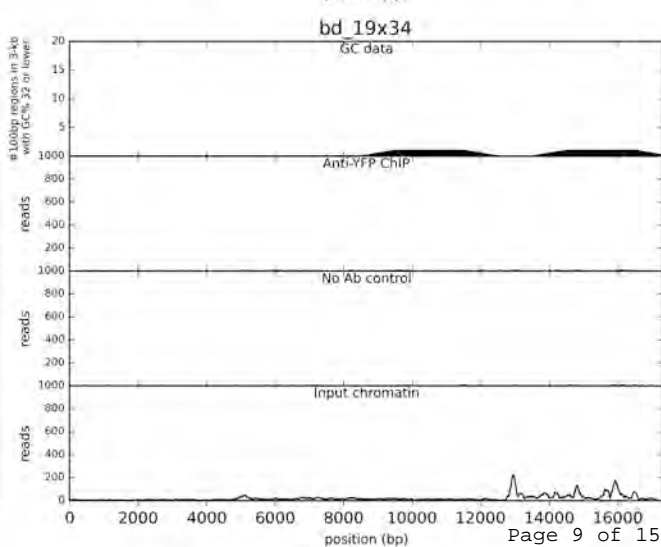



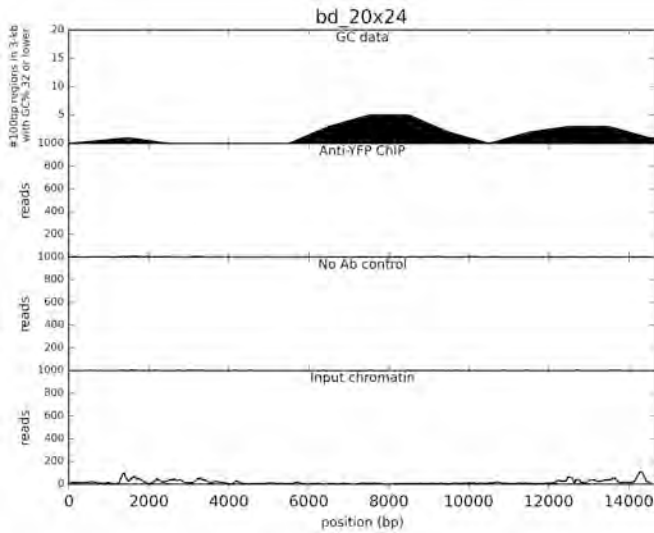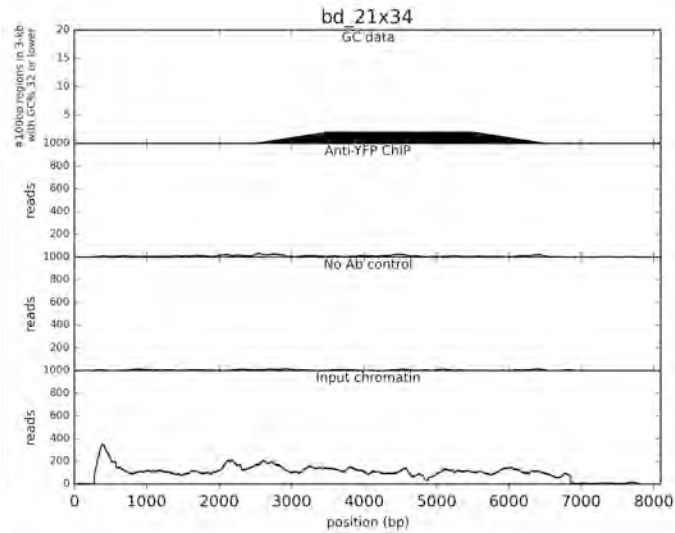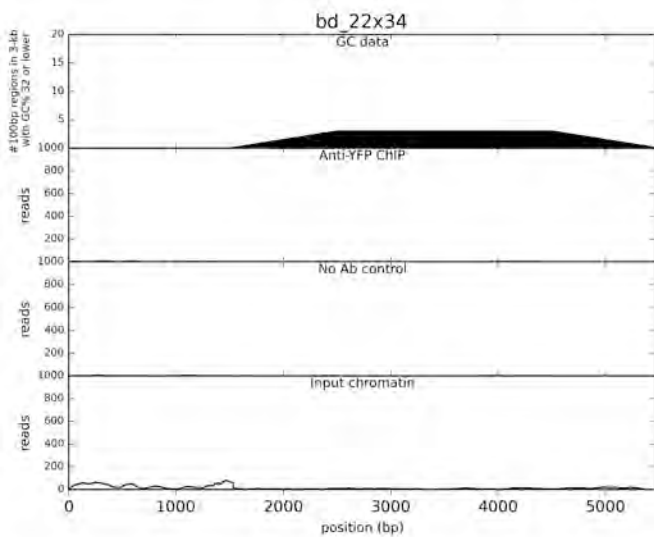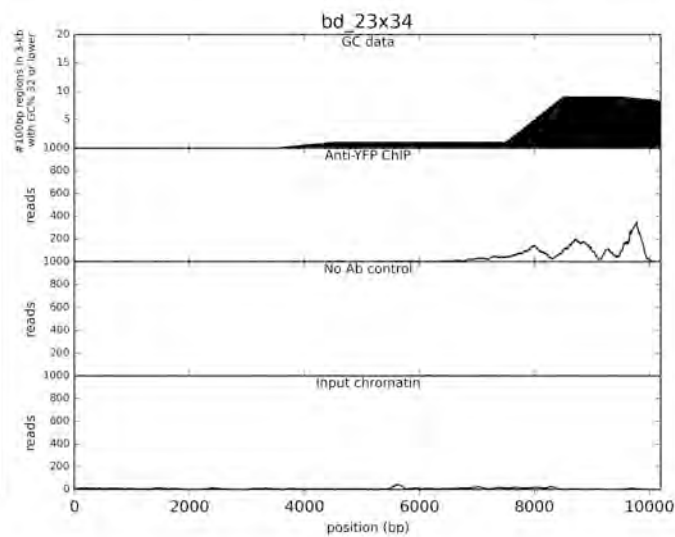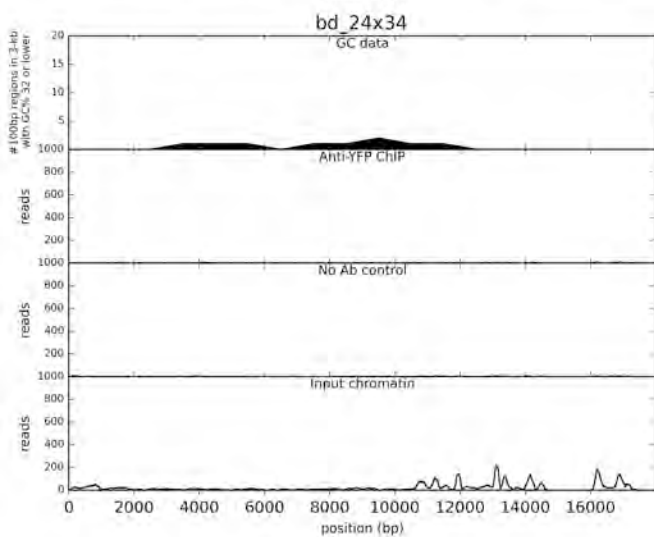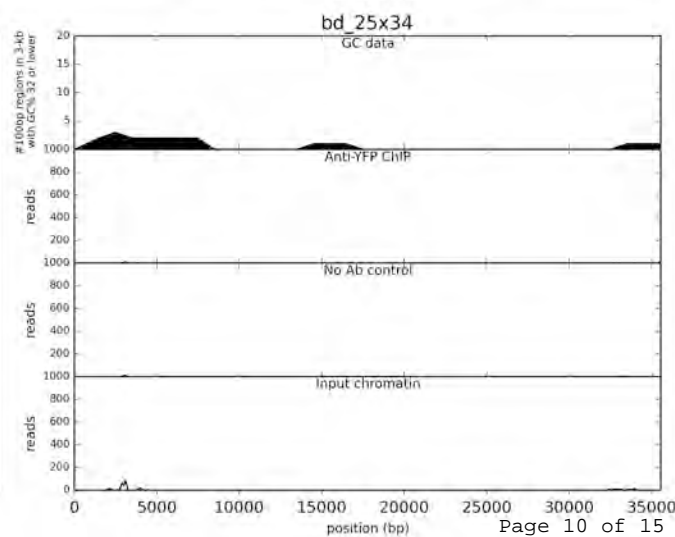

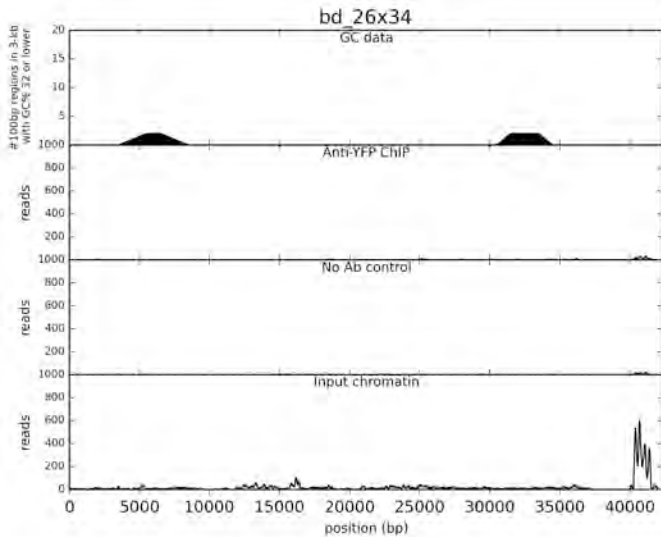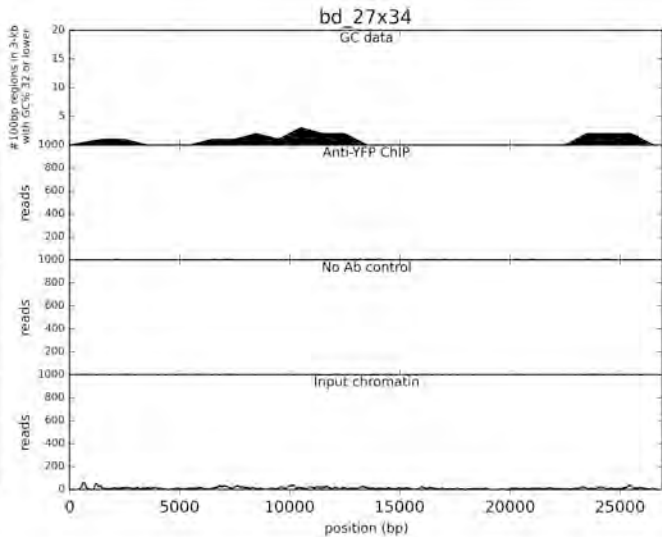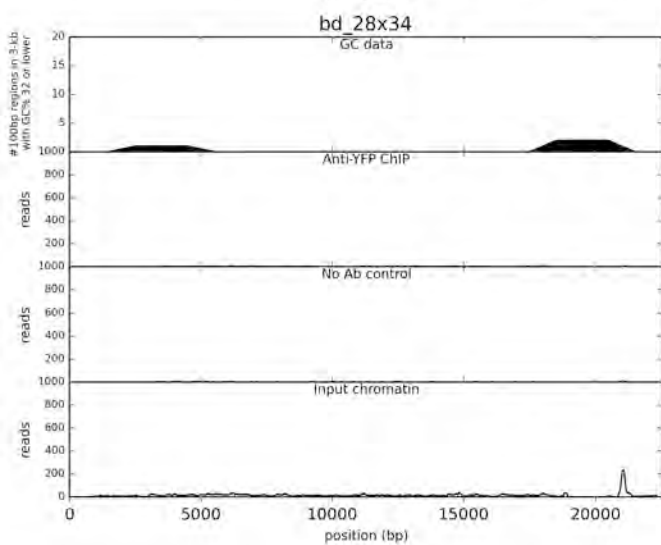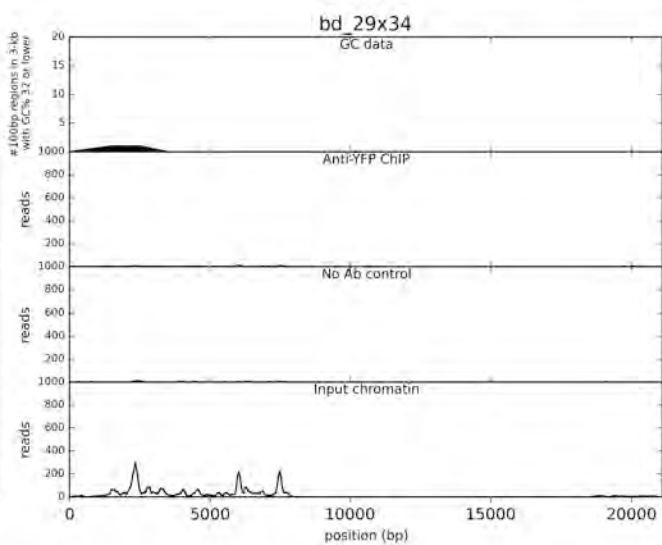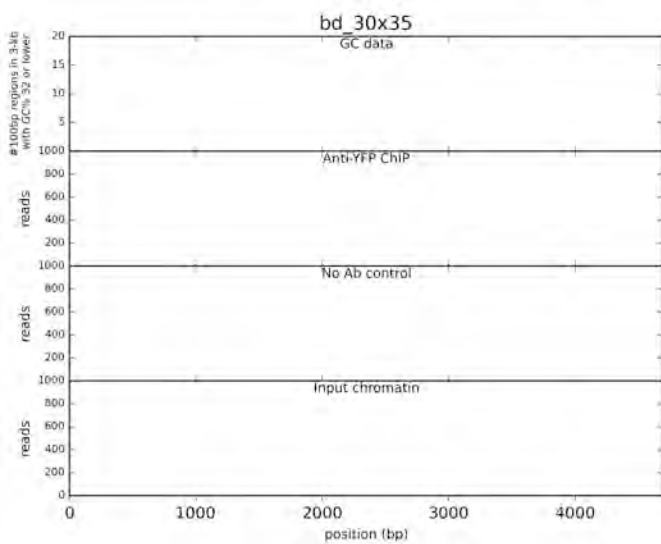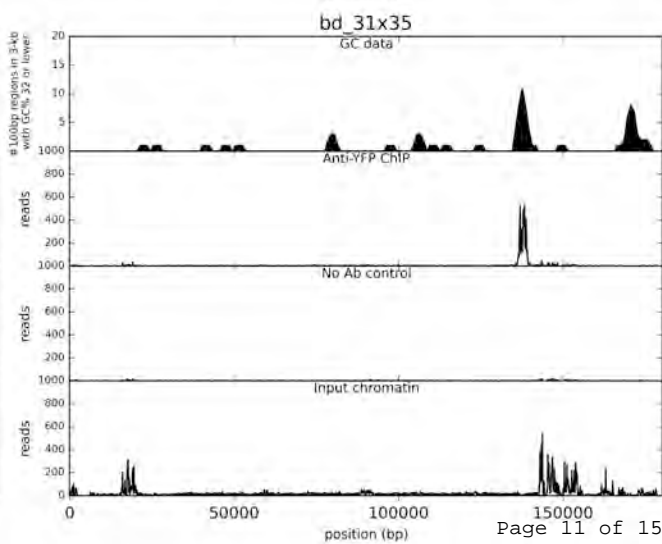

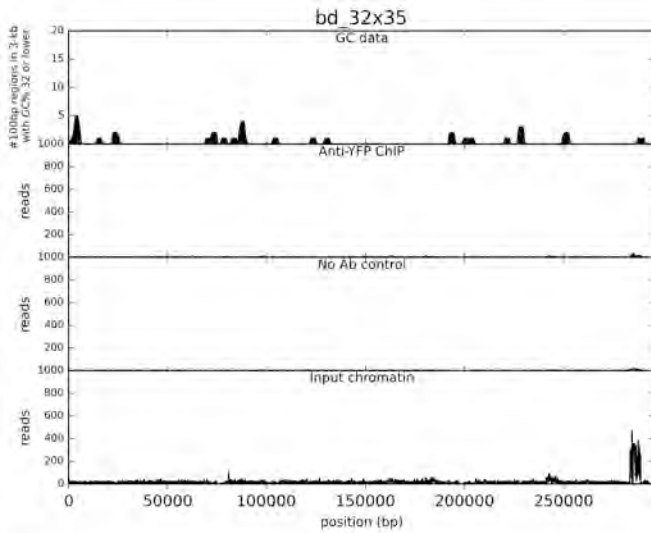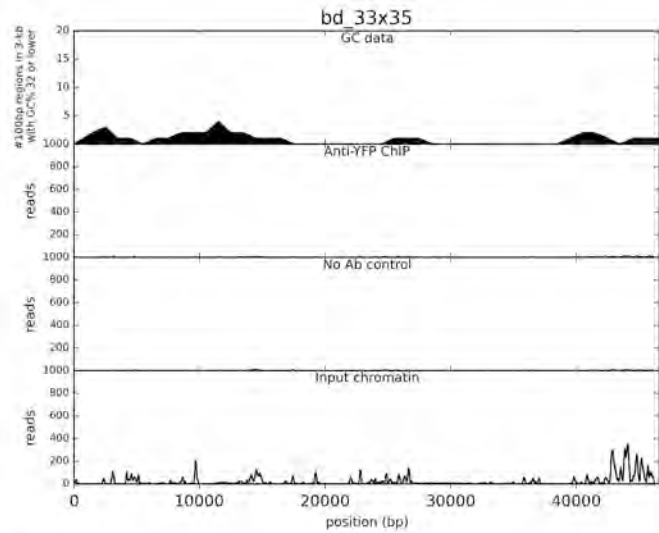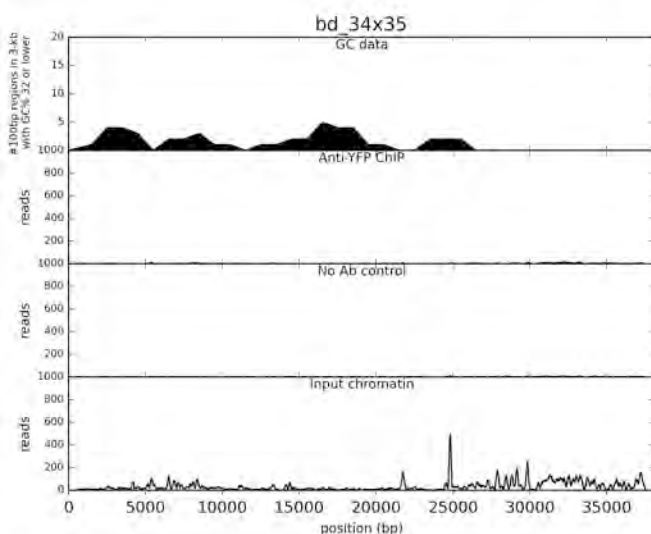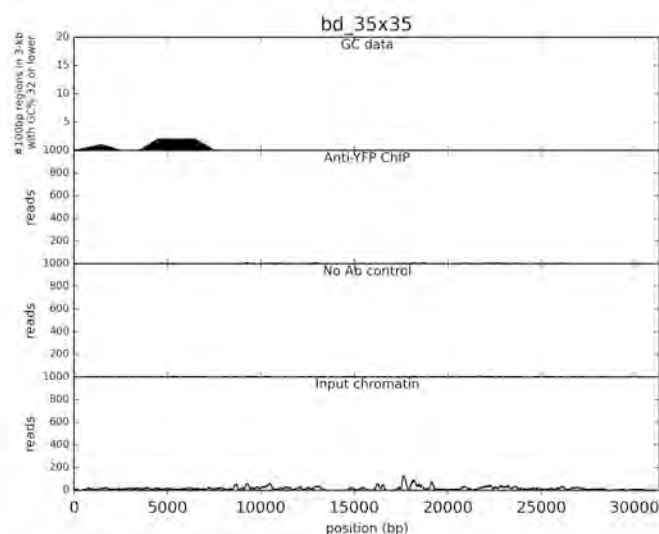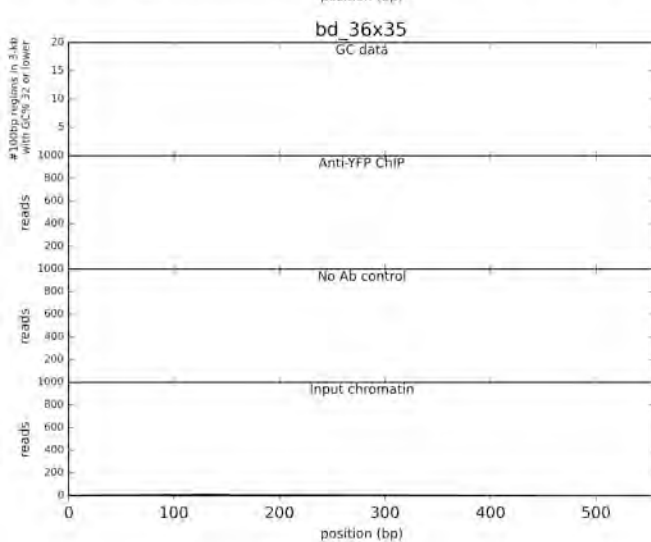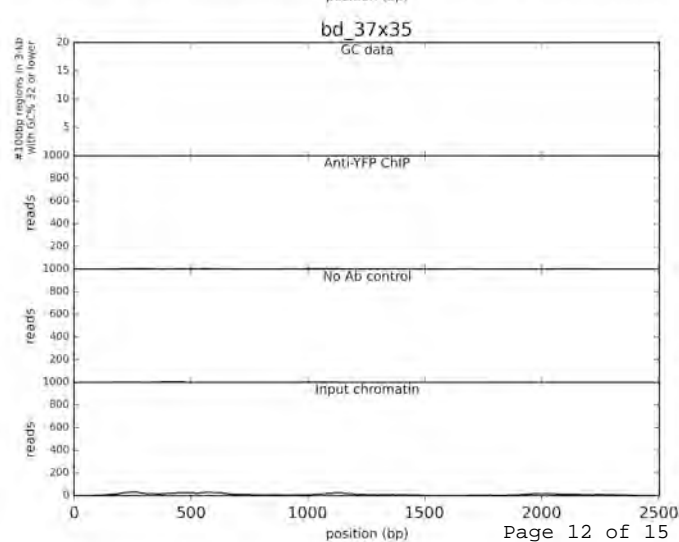

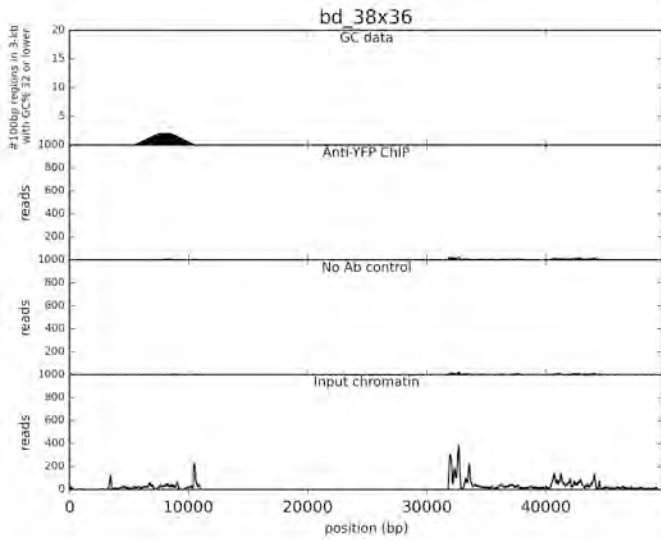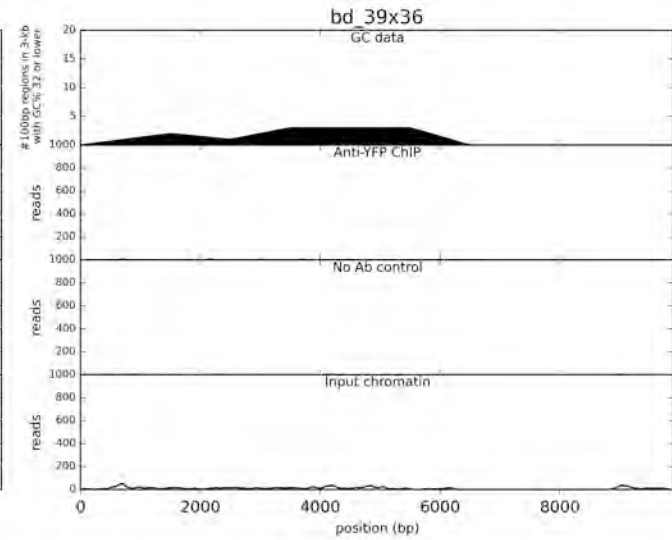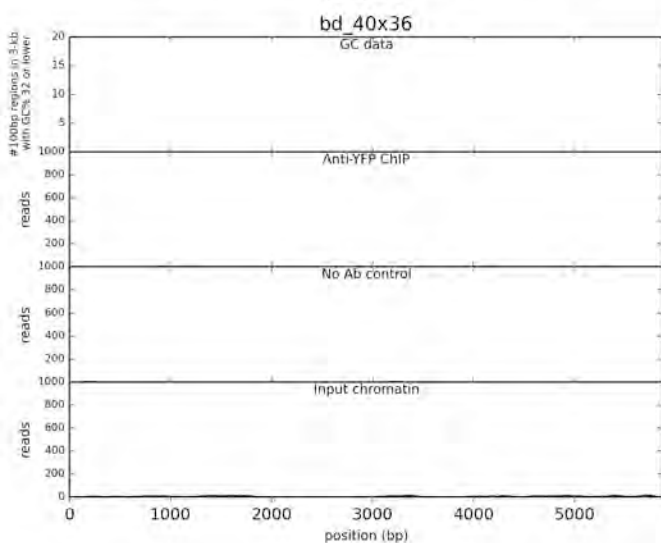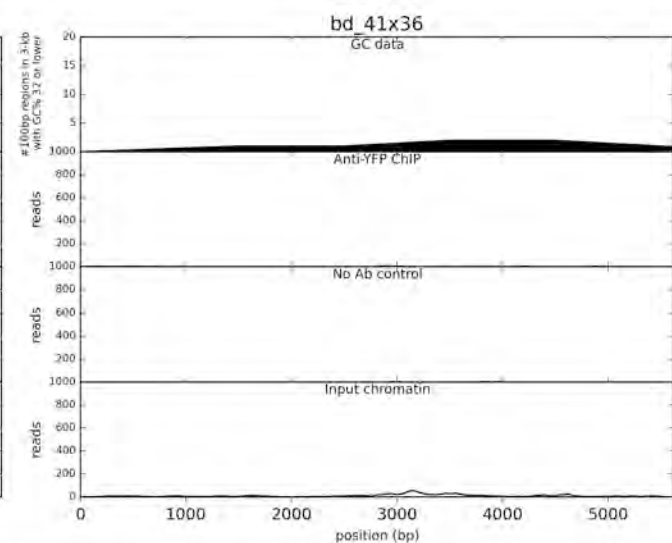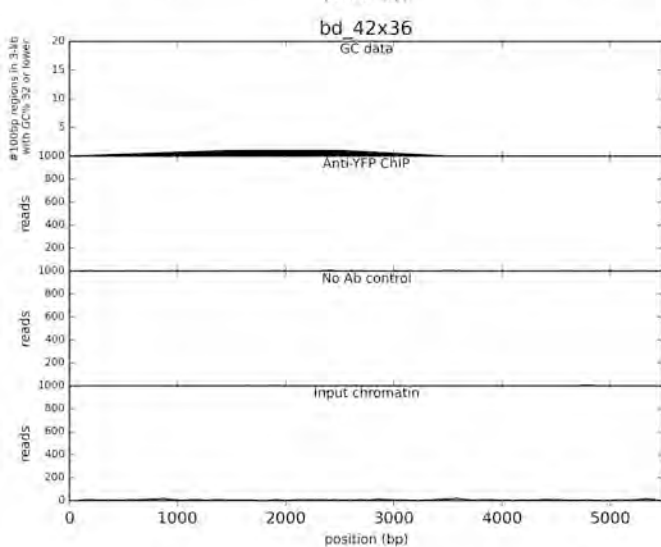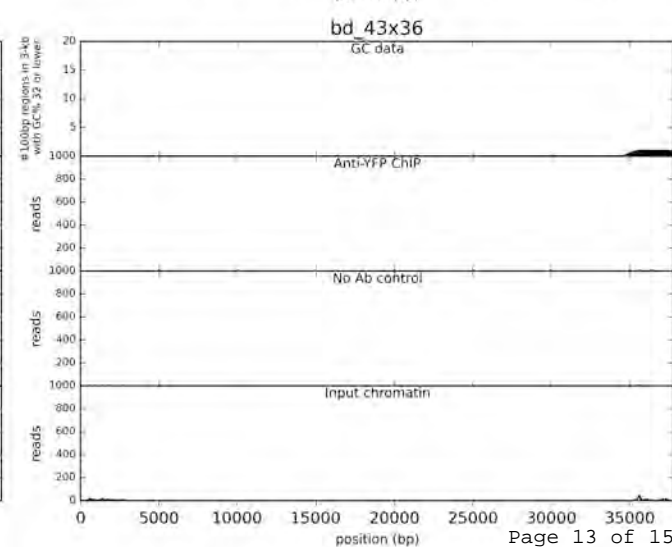

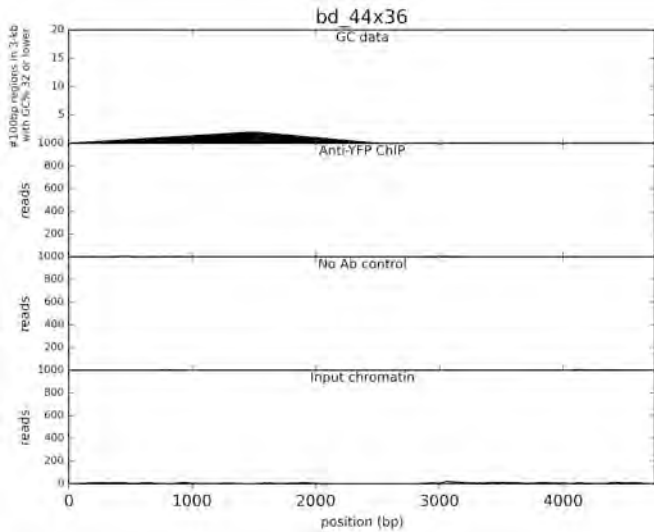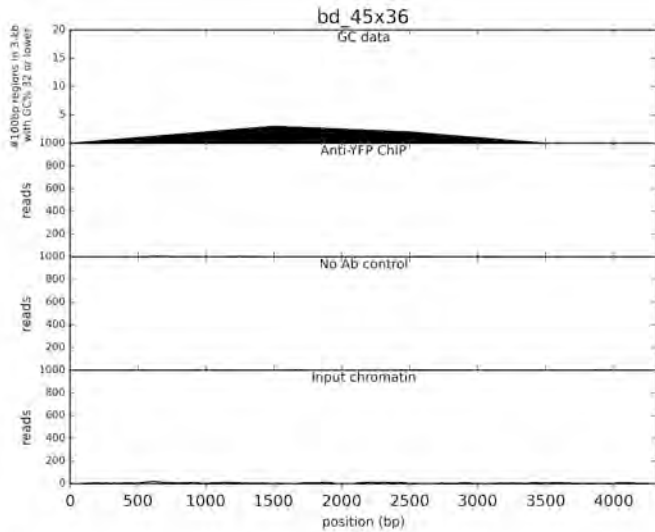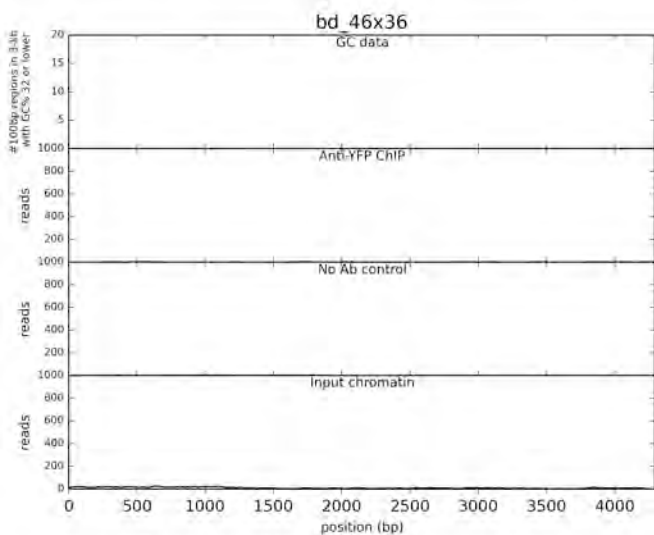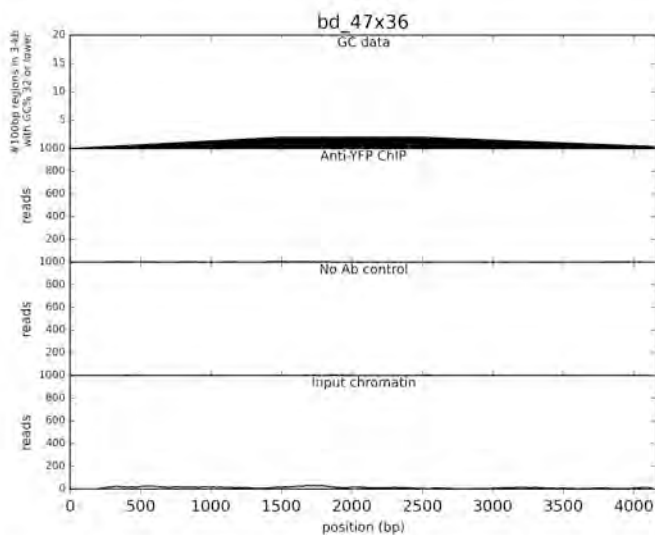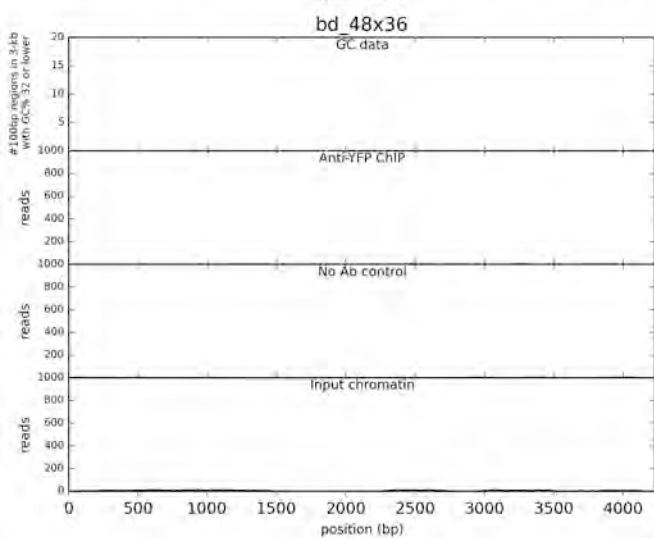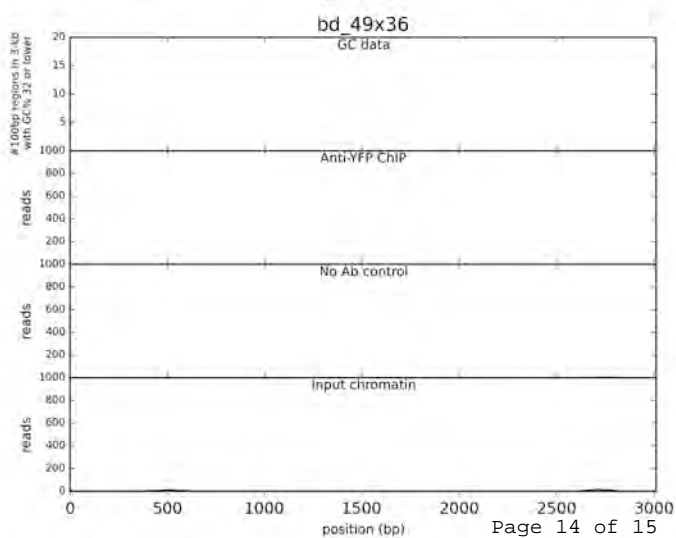



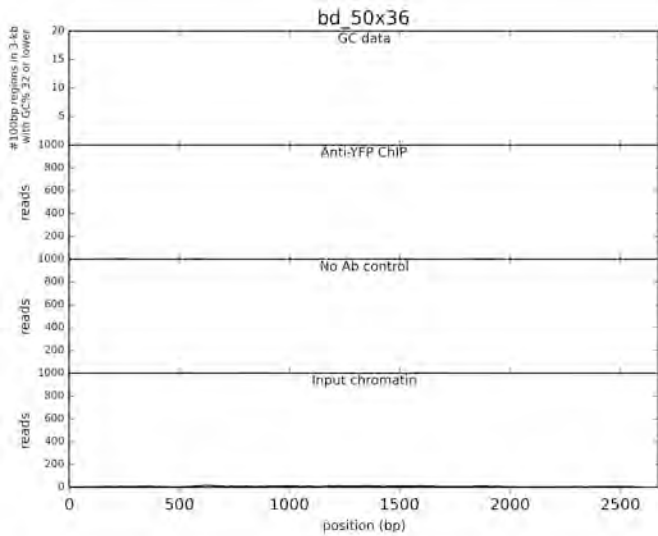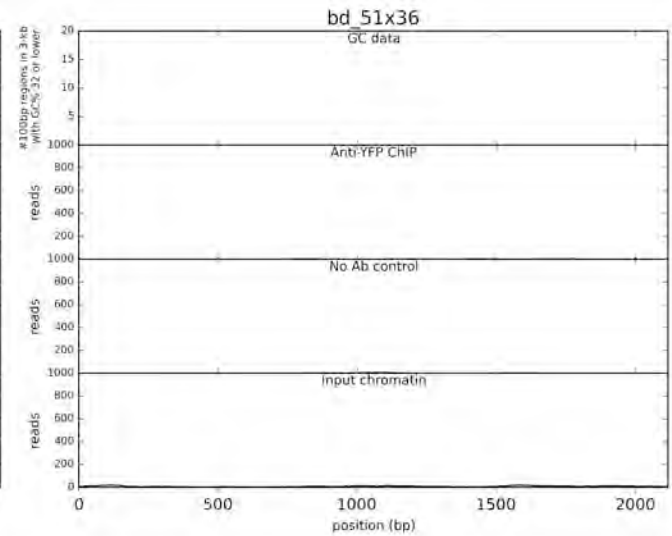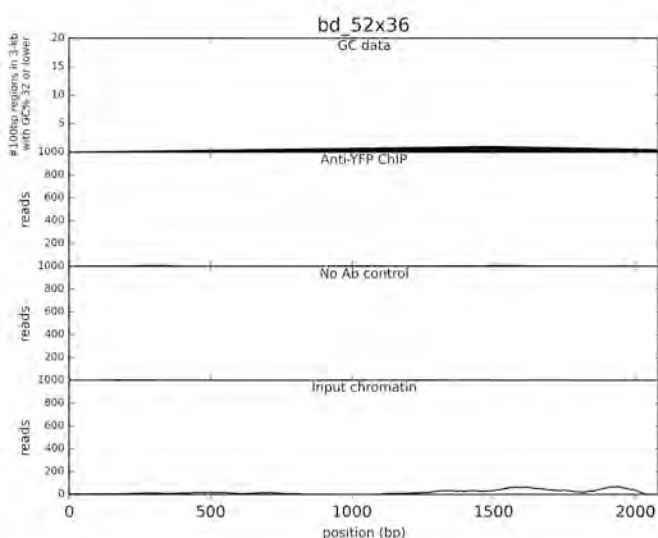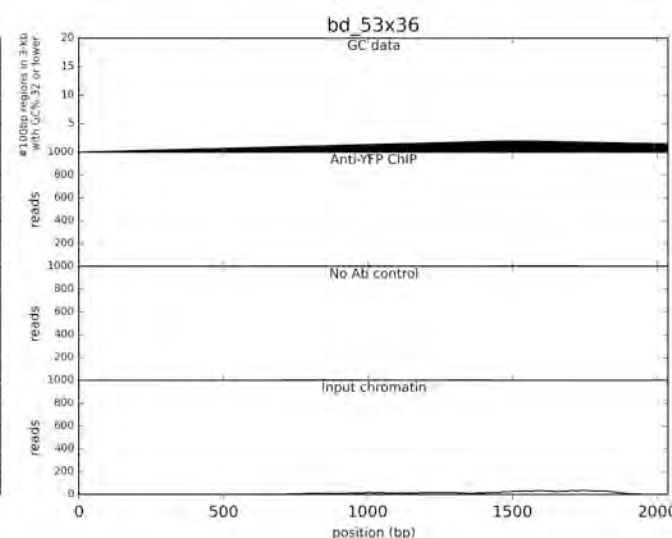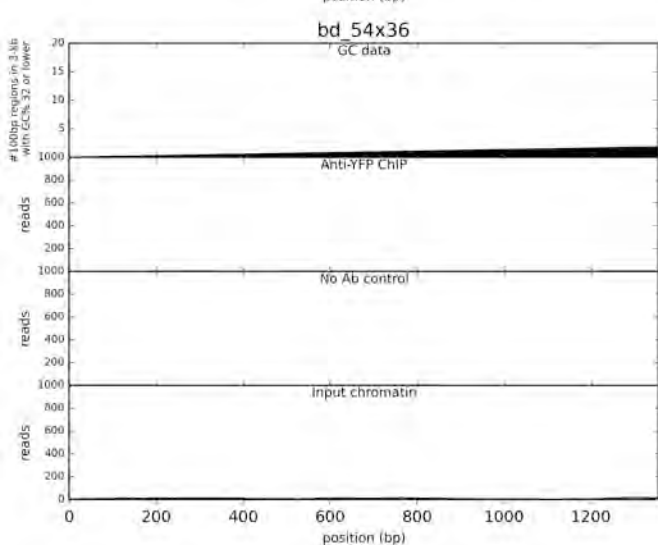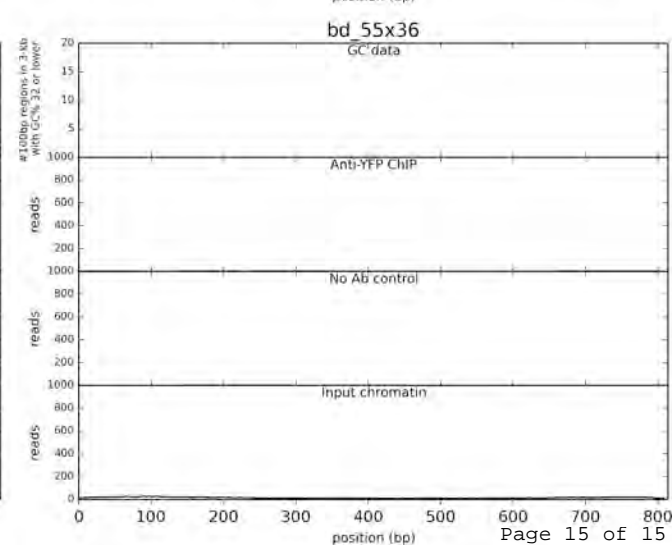

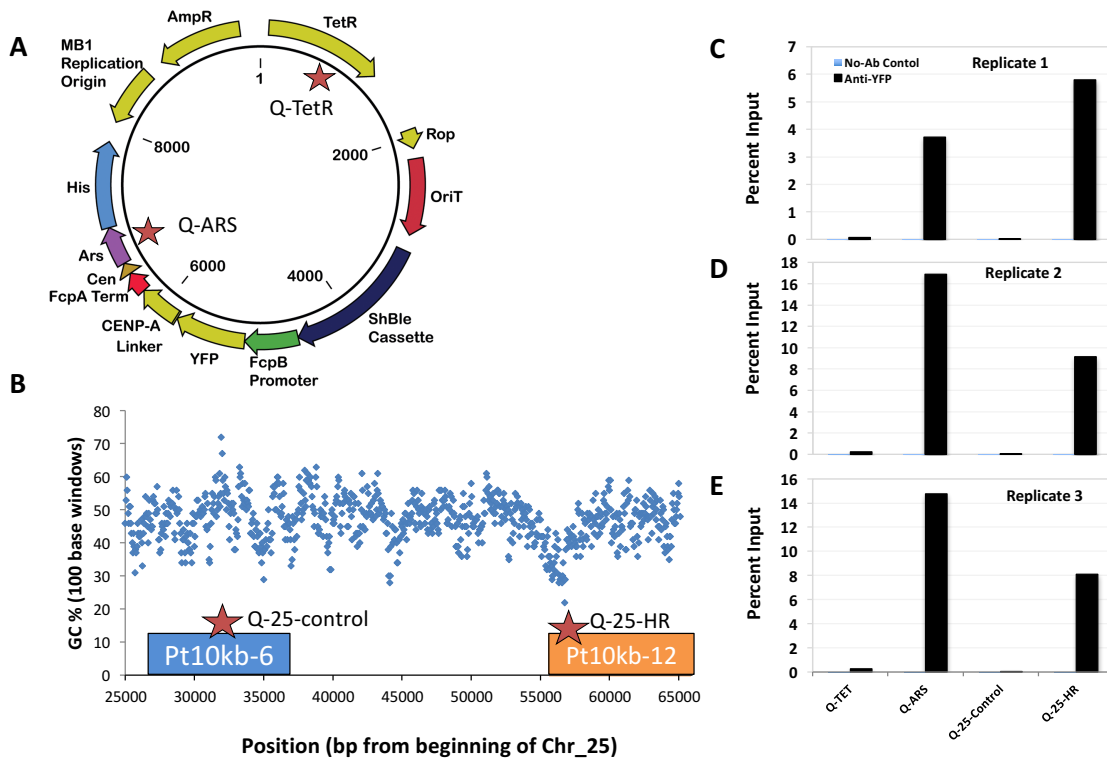

**Supplementary Figure 4: ChIP-qPCR.** **A.** Map of the pPtPBR1-YFP-CENP-A with positions of qPCR primer sets indicated by stars. **B.** Map of chromosome 25 with qPCR primer sets indicated by stars. **C-D.** ChIP-qPCR results calculated as percent of input chromatin for each of the two episomal loci and two chromosomal loci. Parts C-D each show a replicate that was performed from a different *P. tricornutum* line expressing YFP-CENP-A.

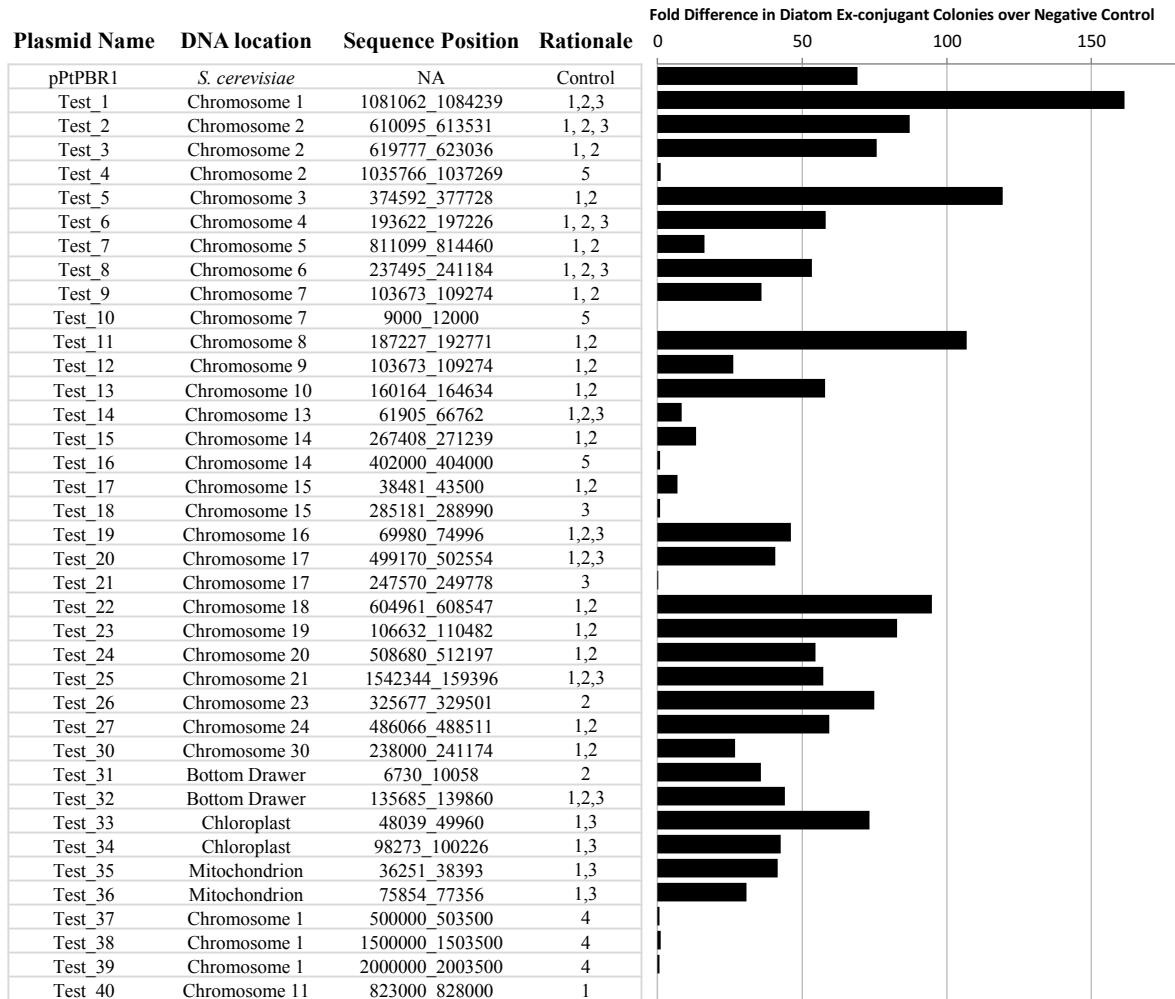

**Supplementary Figure 5: Tests of putative centromeres and other sequences identified by ChIP-seq, bioinformatics analysis, or episome library.** Sequences were identified with the following rationales to test for the ability to support episomal maintenance in *P. tricornutum*: 1) Positive for bioinformatic analysis 2) Positive for YFP-CENP-A-ChIP-seq, 3) identified in episome library, 4) designed negative control, and 5) potential YFP-CENP-A ChIP-seq mapping artifact. Plotted are the number of diatom ex-conjugant colonies obtained after conjugation shown as fold increase in colony numbers over the pPtPBR2 empty vector negative control. Each value is the mean of two independent biological replicates with the exception of Test11.

**Supplementary Figure 6:** GC analysis of the *T. pseudonana* genome. For each chromosomal scaffold, two data series are plotted: 1) the number of 100-bp windows with GC less than or equal to 32% in a larger 3-kb window that advanced by 1-kb each step, and 2) the GC in a sliding 1-kb window that advanced by 200-bp each step.

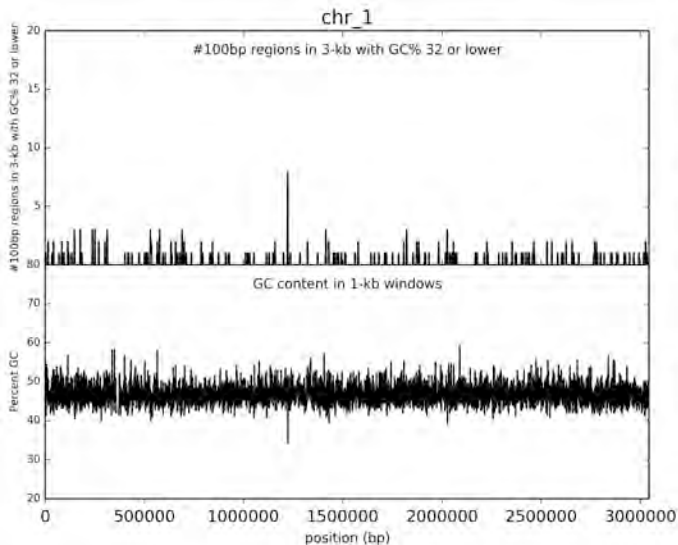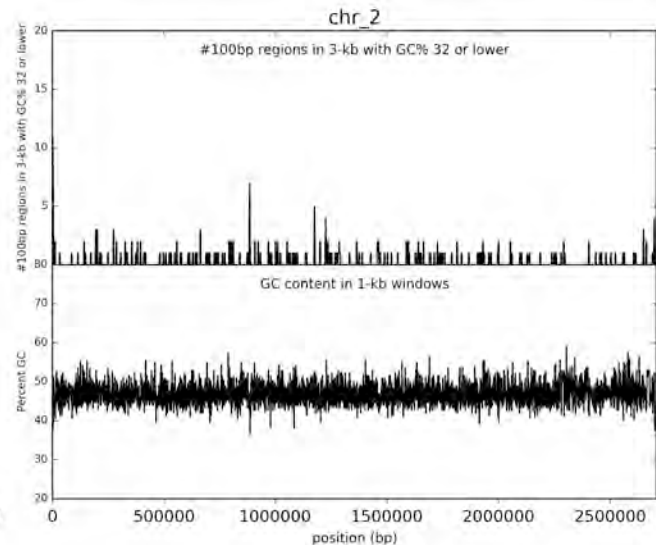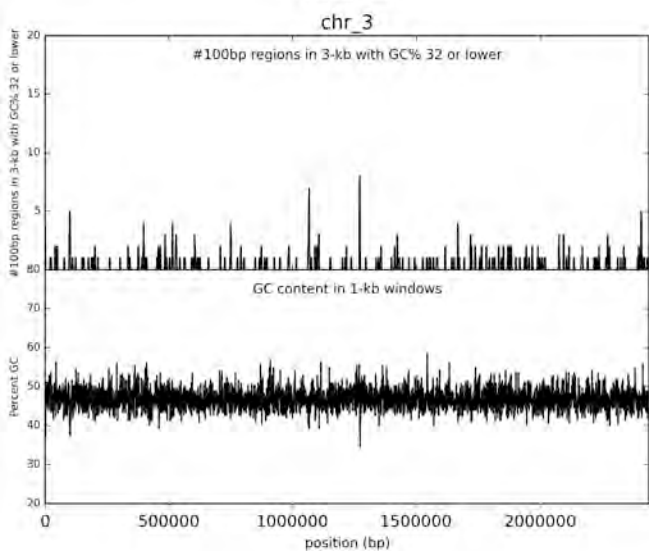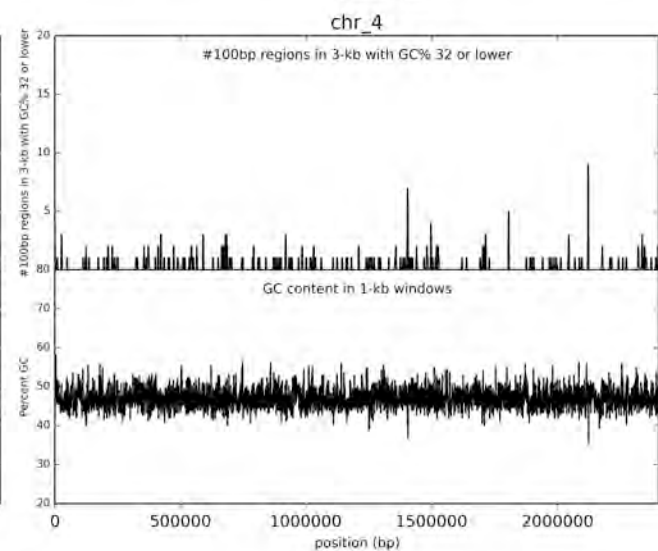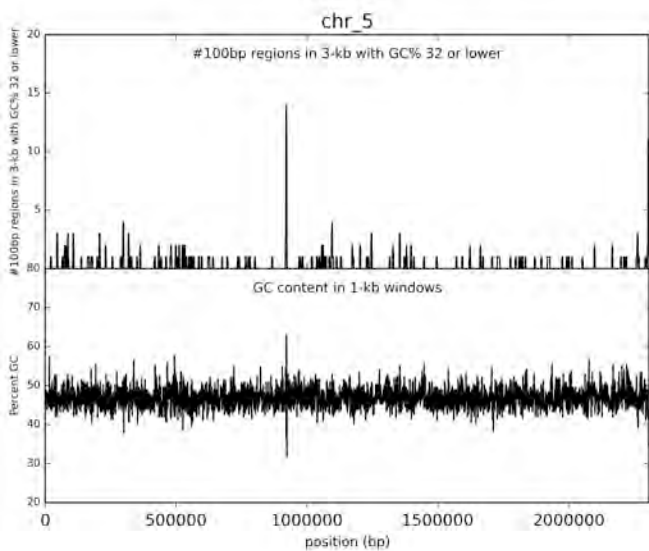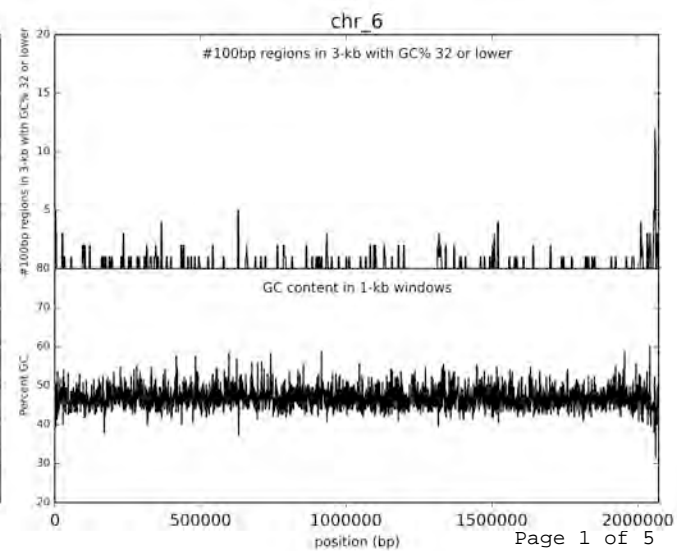



**chr\_7**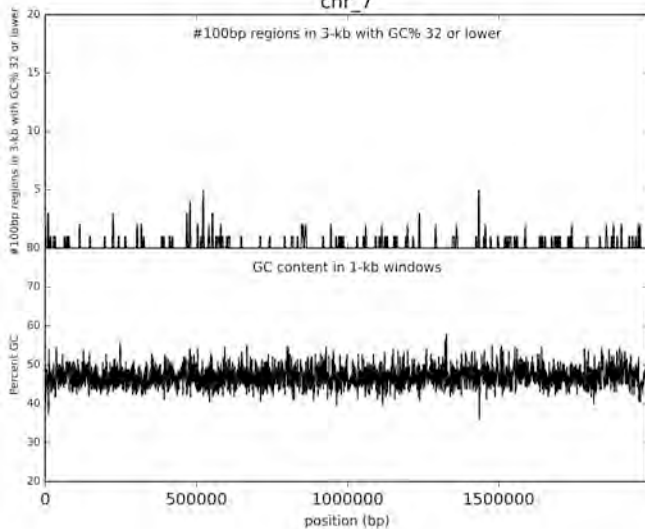**chr\_8**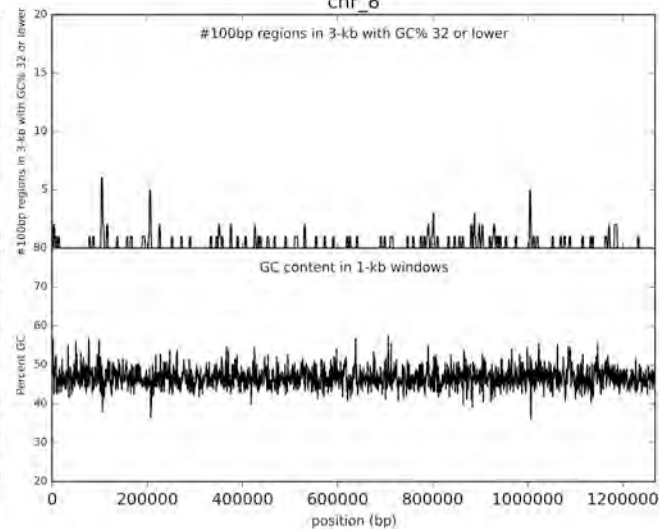**chr\_9**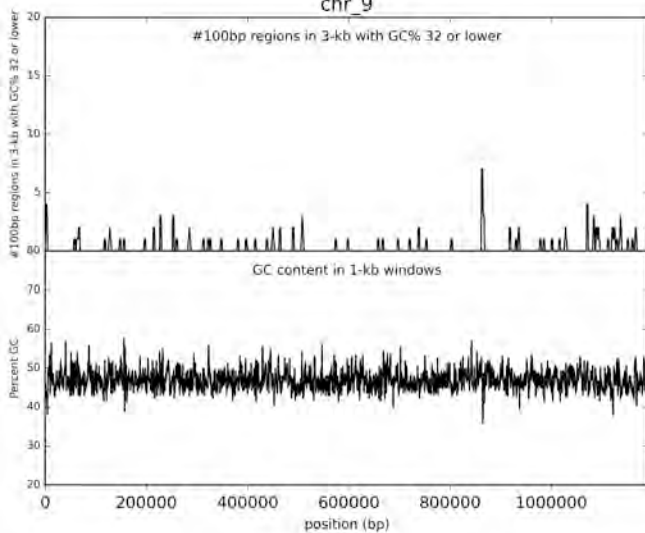**chr\_10**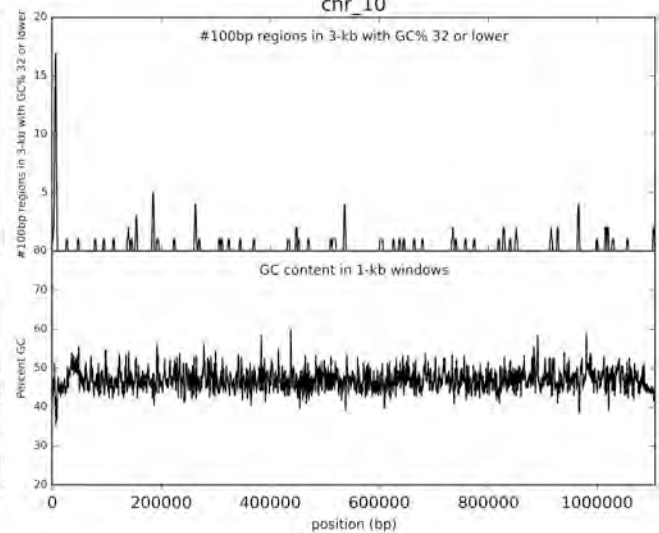**chr\_11a**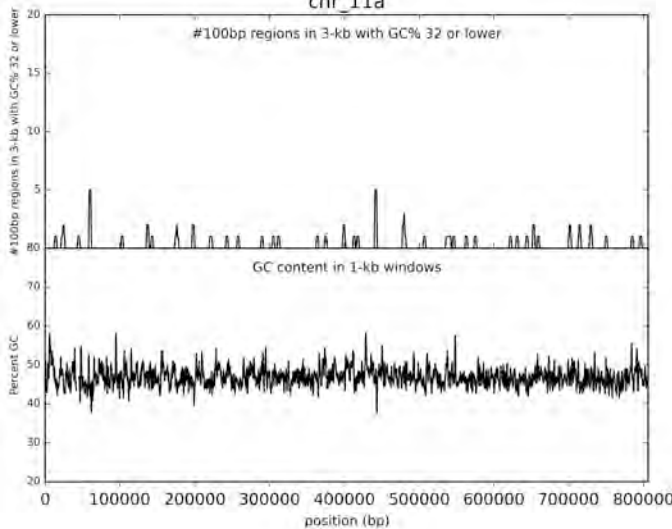**chr\_11b**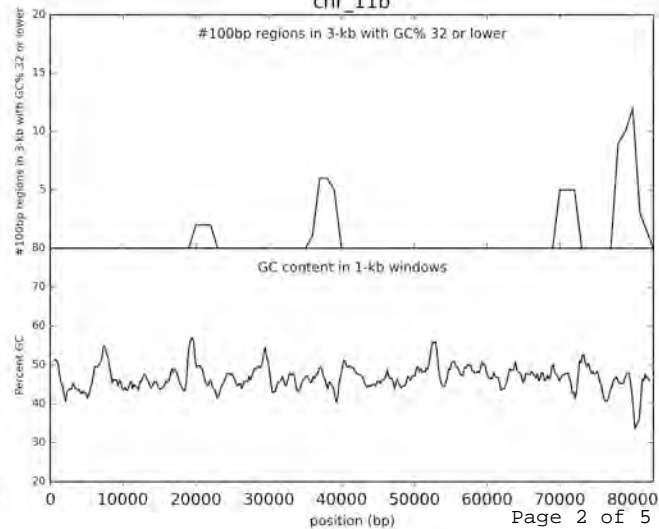

chr\_12

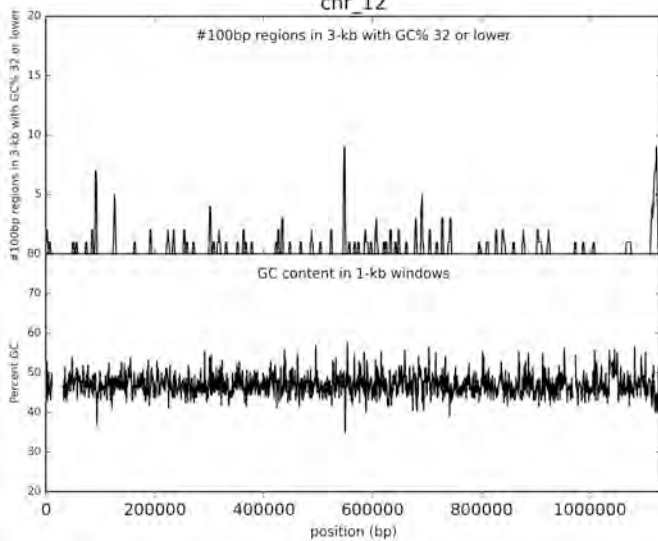

chr\_13

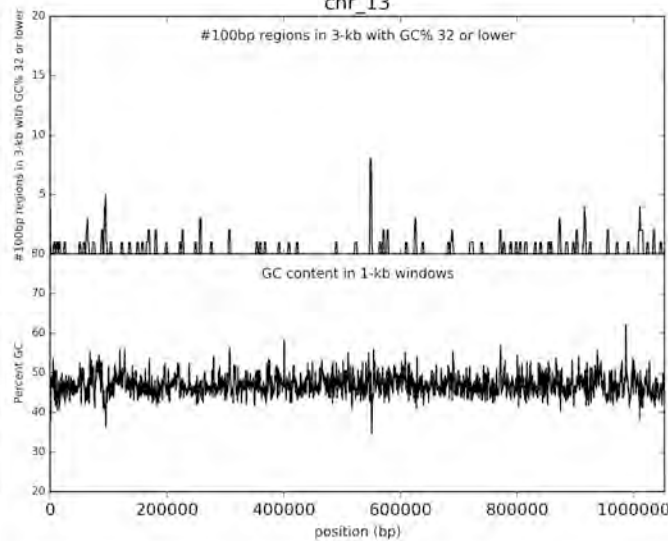

chr\_14

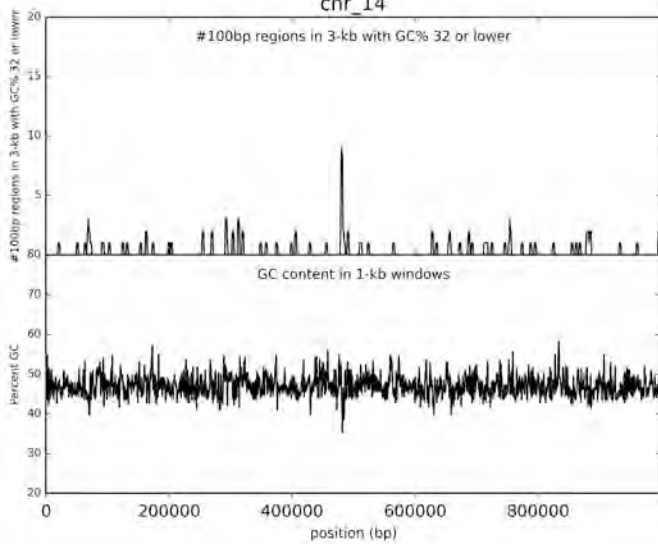

chr\_15

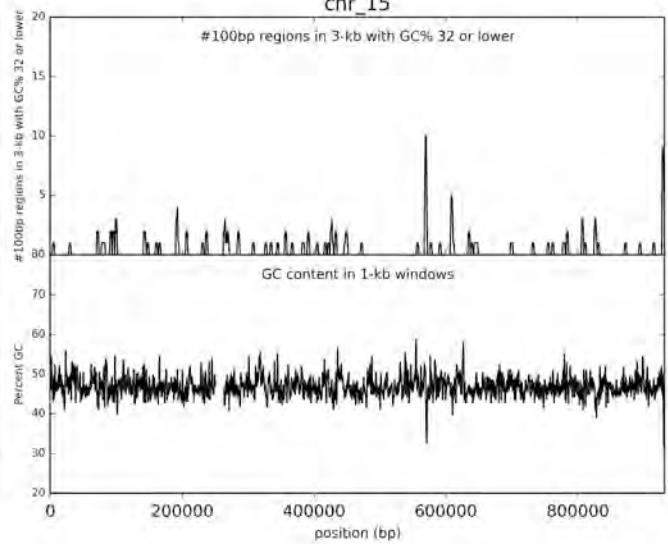

chr\_16a

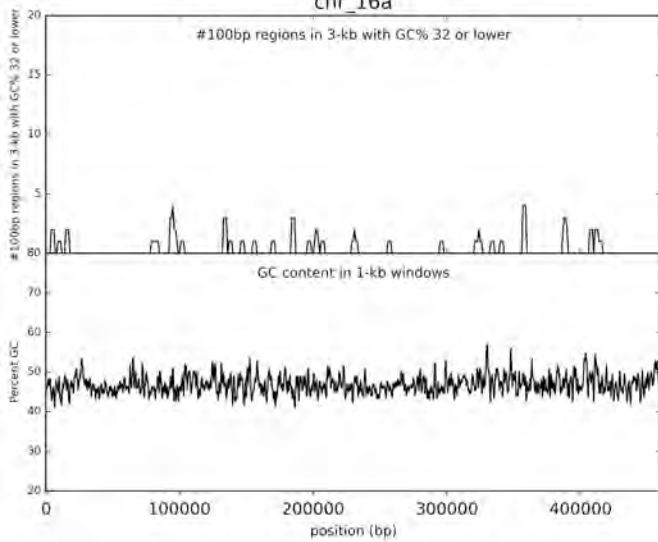

chr\_16b

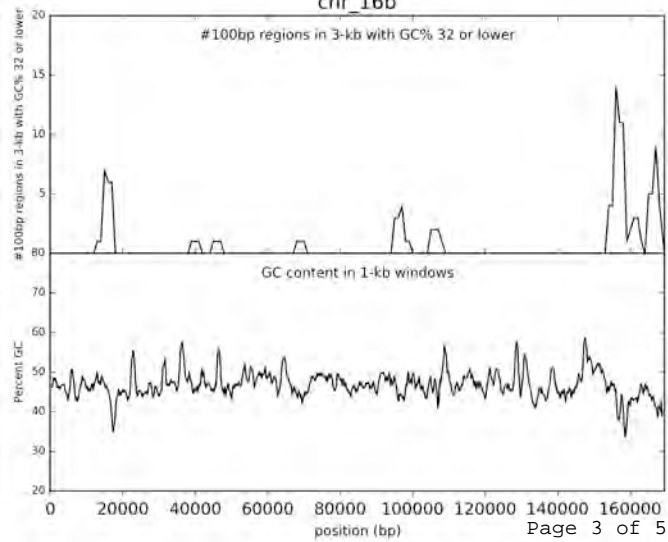

chr\_17

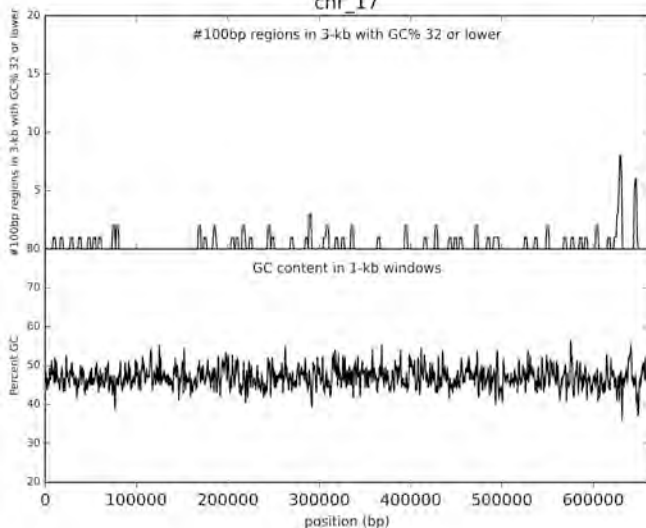

chr\_18

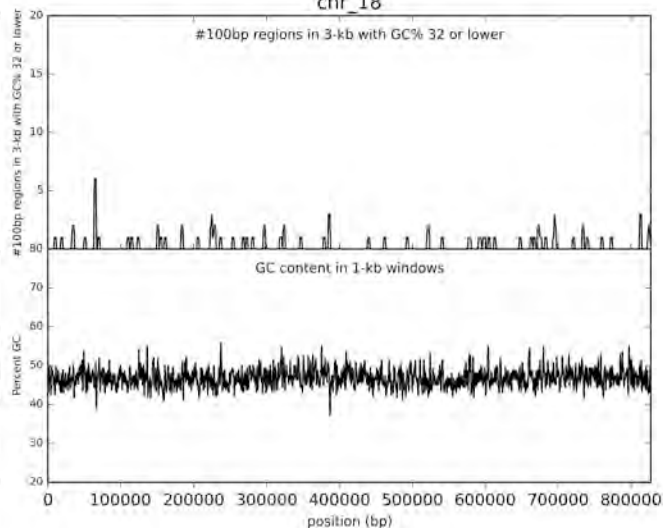

chr\_19a\_19

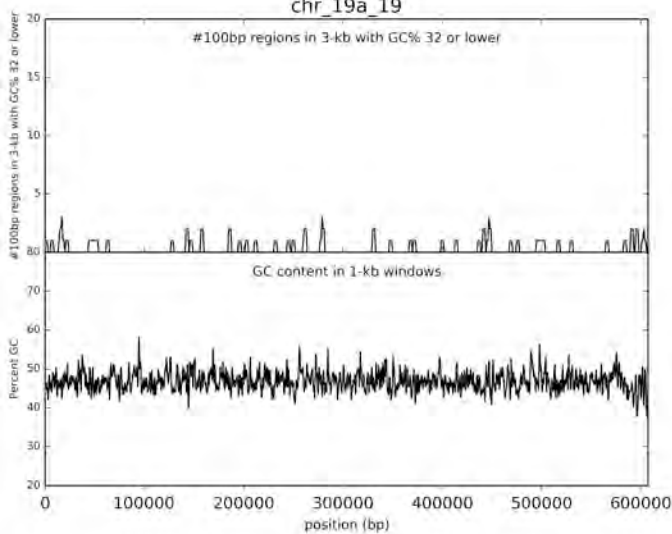

chr\_19b\_31

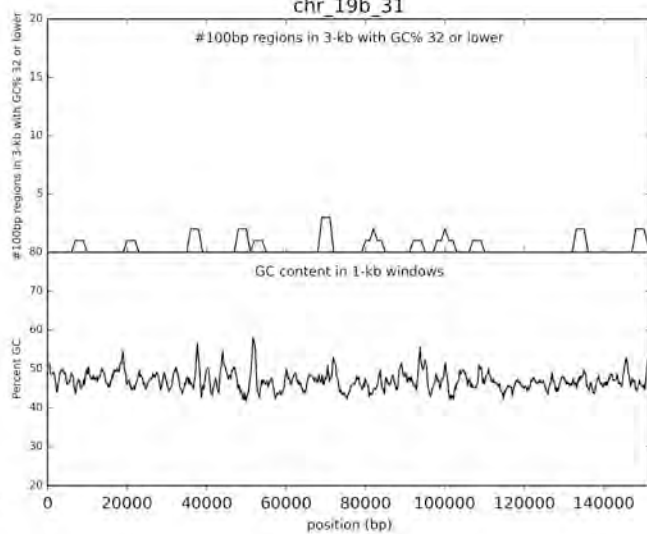

chr\_19c\_29

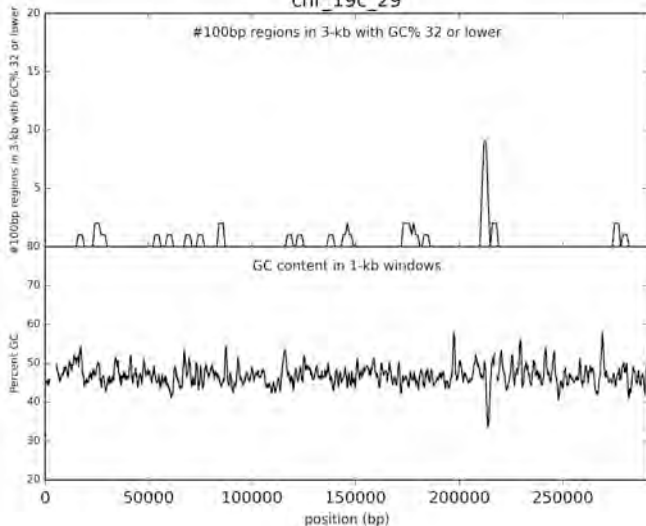

chr\_20

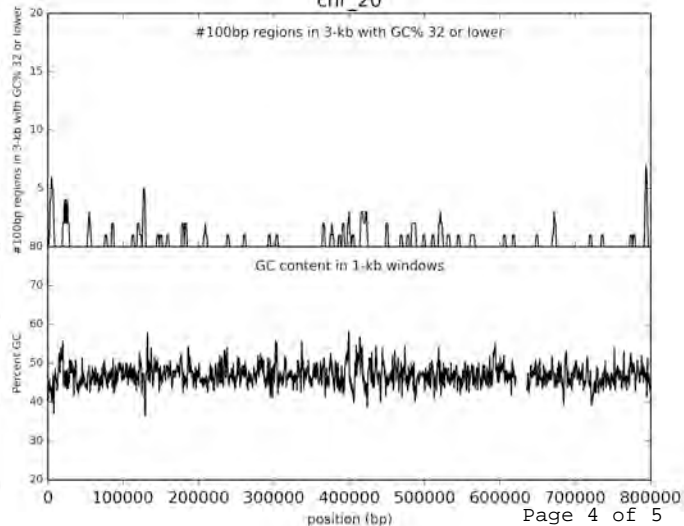

chr\_22

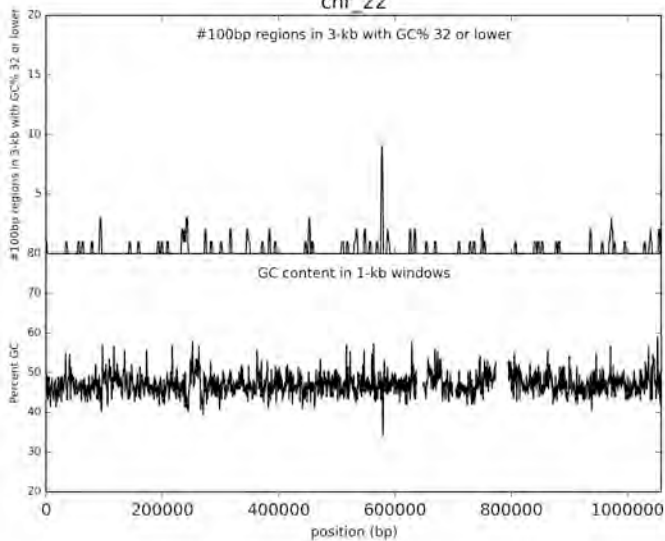

chr\_23

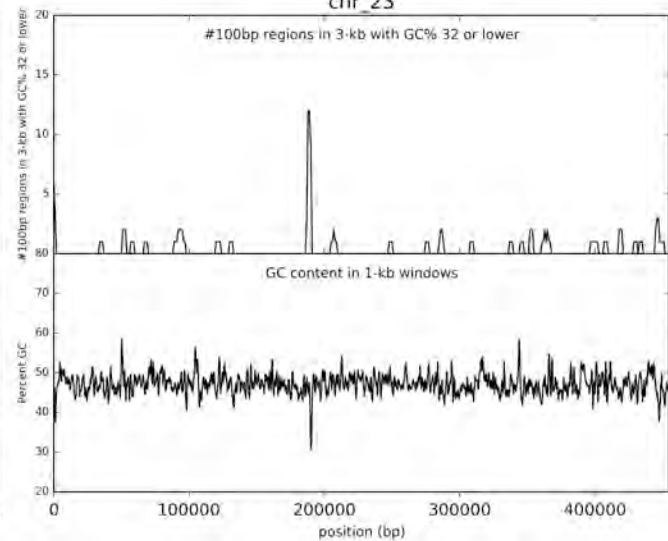

chr\_24

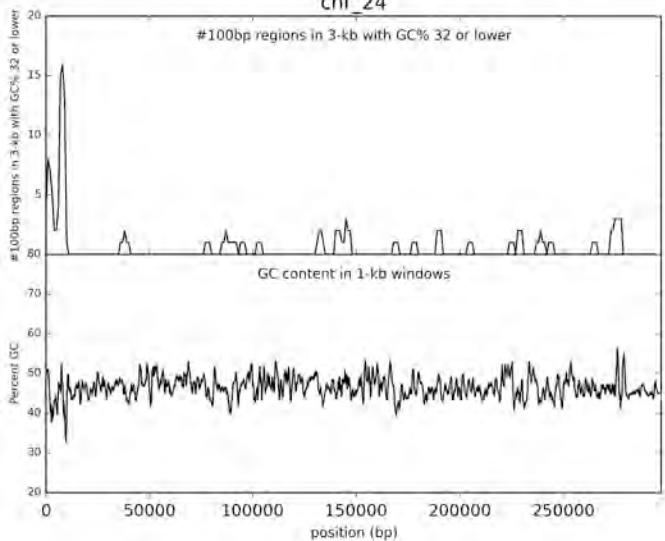

**Phatr2\_16843\_(chr29: 276667..277091)\_CENP-A**

```
atggttcgccacaagcaaacaaaaacccggcgagcgggttccaaaatcatcggacgaact
M V R H K Q T K T R R A G S K I I G R T
cgctcgagtctaaccgaagcaggcaatcgtttaccggcggcggctcccaaacgcaaacga
R S S L T E A G N R L P A A A P K R K R
cgcatgctggcctggacaaaaagcccttaaggaaattaaaatgtacccaaaagagcaccgat
R M R P G Q K A L K E I K M Y Q K S T D
cttttgattcgccgtttgccatttgcacggctggtgctgggaaattcaaattggaaatgagc
L L I R R L P F A R L V R E I Q M E M S
cgagaagcctatcgttggcaggggacagcaattctcgctctacaggaagcgtcgggaagcg
R E A Y R W Q G T A I L A L Q E A S E A
catttggtgtctttgttgaagacaccaatctgtgtgccttgcacggcaaacgggtaacg
H L V S L F E D T N L C A L H G K R V T
atcatgccccaaagatatgcagctcgcacggagaattcgtgggcaaacacgagagtag
I M P K D M Q L A R R I R G Q T R E -
```

**Supplementary Figure 7:** DNA sequence, translation, and genome coordinates of *P. tricornutum* CENP-A used for cloning and expression of YFP-CENP-A fusion protein used for ChIP analyses.



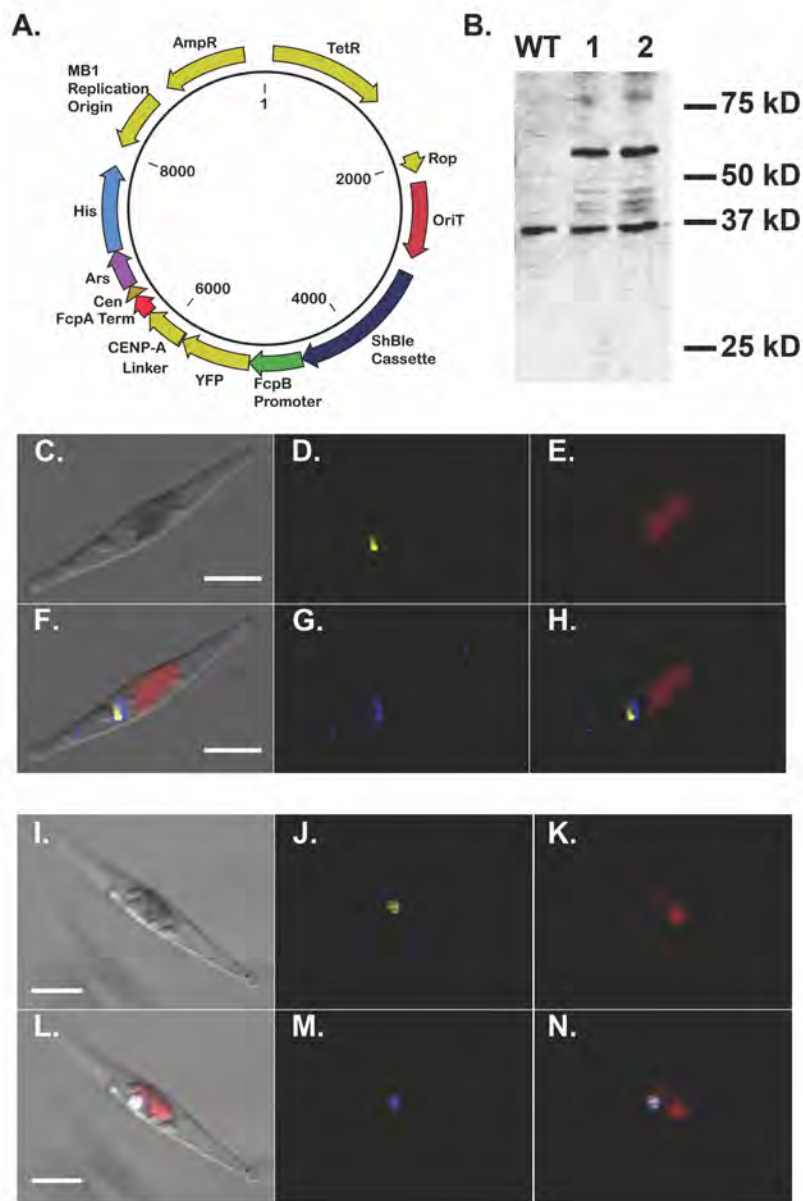

**Supplementary Figure 8:** The YFP-CENP-A fusion is expressed in *P. tricornutum* and localized to the nucleus. **A.** Vector map showing plasmid pPtPBR1-YFP-CENP-A expressed under FcpB promoter on the episome. **B.** Western blot showing wild type (WT) and two ex-conjugant lines expressing the YFP-CENP-A fusion (1 and 2). The expected size of the YFP, Gly5-Ala-spacer and CENP-A fusion is expected to be 43.3 kDa. Multiple bands in the 40-45 kDa region are visible in the YFP-CENP-A lines and absent in the wild type and may correspond to posttranslational modifications of the YFP-CENP-A fusion. A prominent band at ~60 kDa is also differentially observed in the YFP-CENP-A lines. It is unknown if this also corresponds to a modified YFP-CENP-A protein. **C-N:** Scanning electron micrographs showing Brightfield (**C** and **I**), YFP (**D** and **J**), chlorophyll autofluorescence (**E** and **K**), DAPI (**G** and **M**), merged fluorescent channels (**H** and **N**) and all channels merged (**F** and **L**). The YFP-CENP-A signal localizes specifically to the nucleus. Scale bar indicates 5  $\mu\text{m}$ .

**Supplementary Table 1:** Stable maintenance of episomes in *P. tricornutum* enabled by DNA from foreign and native sources. Each clone examined is presented with the percentage of colonies that retained antibiotic resistance abilities after 30 days of passaging with and without selection. A minimum of 40 colonies were plated for each clone.

| Cell Line       | Clone Number | Percent colonies retained after passaging with selection | Percent colonies retained after passaging without selection |
|-----------------|--------------|----------------------------------------------------------|-------------------------------------------------------------|
| Myco-15-500bp-2 | 4            | 95                                                       | 55                                                          |
| Myco-21-500bp-2 | 7            | 98                                                       | 75                                                          |
| Myco-21-500bp-2 | 8            | 91                                                       | 45                                                          |
| Pt25-1kb        | 2            | 98                                                       | 58                                                          |
| Pt25-1kb        | 4            | 98                                                       | 70                                                          |
| AM-2            | 5            | 93                                                       | 84                                                          |
| AM-2            | 8            | 74                                                       | 3                                                           |
| CF1-1           | 1            | 77                                                       | 24                                                          |
| CF1-2           | 2            | 93                                                       | 64                                                          |

**Supplementary Table 2:** Analysis of genetic features associated with putative centromeres on each chromosome scaffold, including tandem repeats ([tandem.bu.edu/trf/trf.html](http://tandem.bu.edu/trf/trf.html)), DNA methylation, and transposon presence ([http://ptepi.biologie.ens.fr/cgi-bin/gbrowse/Pt\\_Epigenome/](http://ptepi.biologie.ens.fr/cgi-bin/gbrowse/Pt_Epigenome/)). Star (\*) indicates that two putative centromeres were identified for that chromosome scaffold, and each was analyzed.

| Scaffold | Tandem repeats<br>(highest scoring hit # repeats, % match) | DNA Methylation? | Transposons? (Annotation) |
|----------|------------------------------------------------------------|------------------|---------------------------|
| 1        | no                                                         | yes              | no                        |
| 2(a)*    | 5: highest score 2 repeats of 188 bp (100% match)          | yes              | no                        |
| 2(b)*    | 2: highest score 1.9 repeats of 104 bp (93% match)         | yes              | yes (CoDi2.2)             |
| 3        | no                                                         | no               | no                        |
| 4        | 2: highest score 2 repeats of 18 bp (95 % match)           | no               | (CAA)n                    |
| 5        | no                                                         | no               | no                        |
| 6        | no                                                         | no               | no                        |
| 7        | no                                                         | no               | no                        |
| 8(a)*    | 1:2 repeats of 137 bp (90% match)                          | no               | yes                       |
| 8(b)*    | 1:2 repeats of 137 bp (90% match)                          | no               | yes (CoDi4.4)             |
| 9        | no                                                         | no               | no                        |
| 10       | 1: 3 repeats of 82 bp (92% match)                          | no               | no                        |
| 13       | 2: 1.9 repeats of 59 bp (91% match)                        | Yes              | yes (PtMu2, CoDi2.1)      |
| 14       | no                                                         | Yes              | yes (CoDi2.4)             |
| 15       | no                                                         | no               | no                        |
| 16       | 1: 2 repeats of 190 bp (96% match)                         | no               | no                        |
| 17       | None                                                       | no               | no                        |
| 18       | 1: 3 repeats of 196 bp (96% match)                         | no               | no                        |
| 19       | no                                                         | yes              | no                        |
| 20       | no                                                         | no               | no                        |
| 21       | no                                                         | no               | yes (PtMu2)               |
| 23       | 1: 3.3 repeats of 16 bp (70% match)                        | yes              | no                        |
| 24       | no                                                         | no               | no                        |
| 25       | no                                                         | no               | no                        |
| 26       | 1: 2 repeats of 59 (87% match)                             | no               | no                        |
| 29       | no                                                         | no               | no                        |
| 30       | no                                                         | no               | no                        |
| bd23x34  | no                                                         | N/A              | N/A                       |
| bd31x35  | no                                                         | N/A              | N/A                       |

**Supplementary Table 3:** Putative *P. tricornutum* centromeres are identified by co-localization of peaks of low GC DNA, ChIP-seq peaks, and fragments recovered from the episome library. Peaks of low GC content in the scaffold is the region with the largest number of 100-bp windows with GC equal or lower than 32% in a larger 3-kb window that advances 1-kb each step. Presented are the boundaries of the peak above background which spans multiple 3-kb windows. The ChIP-seq peaks are the chromosomal regions containing mapped reads higher than background values for the scaffold and with no substantial peak in the input or no antibody controls. The episome library coordinates describe the boundaries of the fragment cloned in the library that conferred episomal maintenance.

| Scaffold | Low GC peak                              |                                       | ChIP-seq peaks |         | Episome library |         | Cloned for testing to support episome maintenance |
|----------|------------------------------------------|---------------------------------------|----------------|---------|-----------------|---------|---------------------------------------------------|
|          | start (first position of 3000 bp window) | end (last position of 3000 bp window) | start          | end     | start           | end     |                                                   |
| 1        | 1078000                                  | 1087199                               | 1081062        | 1084239 | 1081748         | 1083342 | Test_1                                            |
| 2(a)     | 606000                                   | 614999                                | 610095         | 613531  |                 |         | Test_2                                            |
| 2(b)     | 618000                                   | 624999                                | 619777         | 623036  |                 |         | Test_3                                            |
| 3        | 373000                                   | 378999                                | 374592         | 377728  |                 |         | Test_5                                            |
| 4        | 192000                                   | 197999                                | 193622         | 197226  | 194461          | 197322  | Test_6                                            |
| 5        | 809000                                   | 815999                                | 811099         | 814460  |                 |         | Test_7                                            |
| 6        | 236000                                   | 245999                                | 237495         | 241184  | 237659          | 240145  | Test_8                                            |
| 7        | 103000                                   | 108999                                | 103673         | 109274  |                 |         | Test_9                                            |
| 8(a)     | 187000                                   | 193999                                | 187227         | 192771  |                 |         | Test_11                                           |
| 8(b)     | 204000                                   | 210999                                | 205509         | 210699  |                 |         |                                                   |
| 9        | 935000                                   | 941999                                | 936226         | 940481  |                 |         | Test_12                                           |
| 10       | 158000                                   | 165999                                | 160164         | 164634  |                 |         | Test_13                                           |
| 13       | 59000                                    | 67999                                 | 61905          | 66762   | 63224           | 65697   | Test_14                                           |
| 14       | 266000                                   | 272999                                | 267408         | 271239  |                 |         | Test_15                                           |
| 15       | 38000                                    | 43999                                 | 38481          | 43500   |                 |         | Test_17                                           |
| 16       | 69000                                    | 75999                                 | 69980          | 74996   | 70489           | 73466   | Test_19                                           |
| 17       | 497000                                   | 503999                                | 499170         | 502554  | 499063          | 501437  | Test_20                                           |
| 18       | 603000                                   | 608999                                | 604961         | 608547  |                 |         | Test_22                                           |
| 19       | 104000                                   | 112999                                | 106632         | 110482  |                 |         | Test_23                                           |
| 20       | 507000                                   | 512999                                | 508680         | 512197  |                 |         | Test_24                                           |
| 21       | 152000                                   | 160999                                | 154280         | 159416  | 157456          | 160109  | Test_25                                           |
| 23       | 324000                                   | 329999                                | 325677         | 329501  |                 |         | Test_26                                           |
| 24       | 483000                                   | 490999                                | 486066         | 488511  |                 |         | Test_27                                           |
| 25       | 53000                                    | 58999                                 | 54746          | 57862   |                 |         | Pt25-1kb                                          |
| 26       | 381000                                   | 388999                                | 384583         | 387841  | 383651          | 386025  | Pt26-1kb                                          |
| 29       | 2000                                     | 7999                                  | 3643           | 6187    |                 |         |                                                   |
| 30       | 236000                                   | 241999                                | 238000         | 241192  |                 |         | Test_30                                           |
| bd23x34  | 6000                                     | 11999                                 | 6730           | 10084   |                 |         | Test_31                                           |
| bd31x35  | 134000                                   | 141999                                | 135685         | 139860  | 136863          | 138954  | Test_32                                           |

**Supplementary Table 4:** *P. tricornutum* sequences recovered from the forward genetic screen after post-conjugation re-isolation. Sanger DNA sequencing reads for the insert portion of the recovered episome were searched by BLASTn against the set of sequences including the *P. tricornutum* chromosome scaffolds, bottom drawer sequence, and chloroplast and mitochondrion genomes and predicted boundaries of the insert are included for each recovered sequence, as well as the predicted sequence length, average GC content, and whether there were associated ChIP-seq peaks identified in this study.

| Insert NCBI BLASTn hit<br>(scaffold_startposition_endposition) | <i>P. tricornutum</i> Genome<br>Compartment | Seq<br>Length<br>(bp) | Average<br>GC<br>content<br>(%) | Overlaps<br>ChIP-seq<br>peaks? |
|----------------------------------------------------------------|---------------------------------------------|-----------------------|---------------------------------|--------------------------------|
| chr_1_1081748_1083342                                          | nuclear, chromosome<br>scaffold             | 1595                  | 34.2                            | yes                            |
| chr_13_63224_65697                                             | nuclear, chromosome<br>scaffold             | 2474                  | 36.1                            | yes                            |
| chr_15_285181_288990                                           | nuclear, chromosome<br>scaffold             | 3810                  | 48.8                            | no                             |
| chr_16_70489_73466                                             | nuclear, chromosome<br>scaffold             | 2978                  | 39.8                            | yes                            |
| chr_17_247570_249778                                           | nuclear, chromosome<br>scaffold             | 2209                  | 47.4                            | no                             |
| chr_17_499063_501437                                           | nuclear, chromosome<br>scaffold             | 2375                  | 38.0                            | yes                            |
| chr_21_157456_160109                                           | nuclear, chromosome<br>scaffold             | 2654                  | 40.8                            | yes                            |
| chr_26_383651_386025                                           | nuclear, chromosome<br>scaffold             | 2375                  | 39.2                            | yes                            |
| chr_4_194461_197322                                            | nuclear, chromosome<br>scaffold             | 2862                  | 38.4                            | yes                            |
| chr_6_237659_240145                                            | nuclear, chromosome<br>scaffold             | 2487                  | 37.9                            | yes                            |
| bd_31x35_136863_138954                                         | nuclear, non-scaffolded<br>"bottom drawer"  | 2092                  | 36.8                            | yes                            |
| mitochondrion_63_2132                                          | mitochondrion                               | 2070                  | 34.3                            | no                             |
| mitochondrion_867_3391                                         | mitochondrion                               | 2525                  | 36.6                            | no                             |
| mitochondrion_36232_38393                                      | mitochondrion                               | 2162                  | 31.3                            | no                             |
| mitochondrion_38463_40522                                      | mitochondrion                               | 2060                  | 36.5                            | no                             |
| mitochondrion_69543_72278                                      | mitochondrion                               | 2736                  | 36.9                            | no                             |
| mitochondrion_75854_77356                                      | mitochondrion                               | 1503                  | 34.7                            | no                             |
| chloroplast_13290_14357                                        | chloroplast                                 | 1068                  | 38.6                            | no                             |
| chloroplast_38893_41313                                        | chloroplast                                 | 2421                  | 33.7                            | no                             |
| chloroplast_41610_43808                                        | chloroplast                                 | 2199                  | 30.8                            | no                             |
| chloroplast_48005_50003                                        | chloroplast                                 | 1999                  | 31.8                            | no                             |
| chloroplast_51880_54316                                        | chloroplast                                 | 2437                  | 31.7                            | no                             |
| chloroplast_60448_62162                                        | chloroplast                                 | 1715                  | 29.2                            | no                             |
| chloroplast_62422_64593                                        | chloroplast                                 | 2172                  | 30.3                            | no                             |
| chloroplast_64549_67283                                        | chloroplast                                 | 2735                  | 41.3                            | no                             |
| chloroplast_76289_78903                                        | chloroplast                                 | 2615                  | 32.5                            | no                             |
| chloroplast_78359_80578                                        | chloroplast                                 | 2220                  | 34.4                            | no                             |
| chloroplast_84356_86734                                        | chloroplast                                 | 2379                  | 33.2                            | no                             |
| chloroplast_85454_88056                                        | chloroplast                                 | 2603                  | 33.4                            | no                             |
| chloroplast_91714_94142                                        | chloroplast                                 | 2429                  | 33.1                            | no                             |
| chloroplast_94479_96284                                        | chloroplast                                 | 1806                  | 29.4                            | no                             |
| chloroplast_95583_97625                                        | chloroplast                                 | 2043                  | 30.5                            | no                             |
| chloroplast_98223_100258                                       | chloroplast                                 | 2036                  | 31.4                            | no                             |
| chloroplast_99854_101507                                       | chloroplast                                 | 1654                  | 28.2                            | no                             |
| chloroplast_116571_1492                                        | chloroplast                                 | 2291                  | 34.2                            | no                             |

**Supplementary Table 5:** DNA inserts from various sources examined for ability to maintain an episome in *P. tricornutum*, and the GC content of the lowest 500-bp window in each sequence.

| Plasmid Insert | DNA Source                          | GC content (%) of lowest 500 bp window | Episome Maintenance? |
|----------------|-------------------------------------|----------------------------------------|----------------------|
| Myco-15-500-1  | <i>M. mycooides</i> syn1.0          | 15                                     | Yes                  |
| Myco-15-500-2  | <i>M. mycooides</i> syn1.0          | 15                                     | Yes                  |
| Myco-21-500-1  | <i>M. mycooides</i> syn1.0          | 21                                     | Yes                  |
| Myco-21-500-2  | <i>M. mycooides</i> syn1.0          | 21                                     | Yes                  |
| Myco-21-700-1  | <i>M. mycooides</i> syn1.0          | 21.6                                   | Yes                  |
| Myco-21-700-2  | <i>M. mycooides</i> syn1.0          | 20.4                                   | Yes                  |
| Myco-21-1000-1 | <i>M. mycooides</i> syn1.0          | 18.8                                   | Yes                  |
| Myco-21-1000-2 | <i>M. mycooides</i> syn1.0          | 17                                     | Yes                  |
| Myco-28-500-1  | <i>M. mycooides</i> syn1.0          | 28                                     | Yes                  |
| Myco-28-500-2  | <i>M. mycooides</i> syn1.0          | 28                                     | No                   |
| Myco-28-700-1  | <i>M. mycooides</i> syn1.0          | 27.2                                   | Yes                  |
| Myco-28-700-2  | <i>M. mycooides</i> syn1.0          | 26.6                                   | Yes                  |
| Myco-28-1000-1 | <i>M. mycooides</i> syn1.0          | 26.2                                   | Yes                  |
| Myco-28-1000-2 | <i>M. mycooides</i> syn1.0          | 23                                     | Yes                  |
| Myco-30-500-1  | <i>M. mycooides</i> syn1.0          | 30                                     | Yes                  |
| Myco-30-500-2  | <i>M. mycooides</i> syn1.0          | 30                                     | No                   |
| Myco-30-1000-1 | <i>M. mycooides</i> syn1.0          | 28                                     | Yes                  |
| Myco-30-700-1  | <i>M. mycooides</i> syn1.0          | 29.4                                   | No                   |
| Myco-30-700-2  | <i>M. mycooides</i> syn1.0          | 29.4                                   | Yes                  |
| Myco-30-1000-2 | <i>M. mycooides</i> syn1.0          | 28                                     | Yes                  |
| Myco-40-500-1  | <i>M. mycooides</i> syn1.0          | 40                                     | No                   |
| Myco-40-500-2  | <i>M. mycooides</i> syn1.0          | 40                                     | No                   |
| Myco-50-500-1  | <i>M. mycooides</i> syn1.0          | 50.2                                   | No                   |
| Myco-50-500-2  | <i>M. mycooides</i> syn1.0          | 50.6                                   | No                   |
| Test 1         | <i>P. tricornutum</i> Chromosome 1  | 31.8                                   | Yes                  |
| Test 2         | <i>P. tricornutum</i> Chromosome 2  | 32.4                                   | Yes                  |
| Test 3         | <i>P. tricornutum</i> Chromosome 2  | 31.8                                   | Yes                  |
| Test 4         | <i>P. tricornutum</i> Chromosome 2  | 40.8                                   | No                   |
| Test 5         | <i>P. tricornutum</i> Chromosome 3  | 31.8                                   | Yes                  |
| Test 6         | <i>P. tricornutum</i> Chromosome 4  | 31.6                                   | Yes                  |
| Test 7         | <i>P. tricornutum</i> Chromosome 5  | 32                                     | Yes                  |
| Test 8         | <i>P. tricornutum</i> Chromosome 6  | 31                                     | Yes                  |
| Test 9         | <i>P. tricornutum</i> Chromosome 7  | 31.6                                   | Yes                  |
| Test 10        | <i>P. tricornutum</i> Chromosome 7  | 41.8                                   | No                   |
| Test 11        | <i>P. tricornutum</i> Chromosome 8  | 31.2                                   | Yes                  |
| Test 12        | <i>P. tricornutum</i> Chromosome 9  | 31                                     | Yes                  |
| Test 13        | <i>P. tricornutum</i> Chromosome 10 | 30.2                                   | Yes                  |
| Test 14        | <i>P. tricornutum</i> Chromosome 13 | 32                                     | Yes                  |
| Test 15        | <i>P. tricornutum</i> Chromosome 14 | 32                                     | Yes                  |
| Test 16        | <i>P. tricornutum</i> Chromosome 14 | 54.2                                   | No                   |
| Test 17        | <i>P. tricornutum</i> Chromosome 15 | 30.4                                   | Yes                  |
| Test 18        | <i>P. tricornutum</i> Chromosome 15 | 43.2                                   | No                   |
| Test 19        | <i>P. tricornutum</i> Chromosome 16 | 31.2                                   | Yes                  |
| Test 20        | <i>P. tricornutum</i> Chromosome 17 | 31                                     | Yes                  |
| Test 21        | <i>P. tricornutum</i> Chromosome 17 | 41.8                                   | No                   |
| Test 22        | <i>P. tricornutum</i> Chromosome 18 | 30.2                                   | Yes                  |
| Test 23        | <i>P. tricornutum</i> Chromosome 19 | 32                                     | Yes                  |
| Test 24        | <i>P. tricornutum</i> Chromosome 20 | 30.8                                   | Yes                  |
| Test 25        | <i>P. tricornutum</i> Chromosome 21 | 32                                     | Yes                  |
| Test 26        | <i>P. tricornutum</i> Chromosome 23 | 33.8                                   | Yes                  |
| Test 27        | <i>P. tricornutum</i> Chromosome 24 | 28                                     | Yes                  |
| Test 30        | <i>P. tricornutum</i> Chromosome 30 | 29.6                                   | Yes                  |
| Test 31        | <i>P. tricornutum</i> Bottom Drawer | 29.2                                   | Yes                  |
| Test 32        | <i>P. tricornutum</i> Bottom Drawer | 31                                     | Yes                  |
| Test 33        | <i>P. tricornutum</i> Chloroplast   | 23.4                                   | Yes                  |
| Test 34        | <i>P. tricornutum</i> Chloroplast   | 27.6                                   | Yes                  |
| Test 35        | <i>P. tricornutum</i> Mitochondrion | 25.6                                   | Yes                  |
| Test 36        | <i>P. tricornutum</i> Mitochondrion | 29.8                                   | Yes                  |
| Test 37        | <i>P. tricornutum</i> Chromosome 1  | 41.6                                   | No                   |



|             |                                                                                                   |      |     |
|-------------|---------------------------------------------------------------------------------------------------|------|-----|
| Test 38     | <i>P. tricornutum</i> Chromosome 1                                                                | 44.4 | No  |
| Test 39     | <i>P. tricornutum</i> Chromosome 1                                                                | 42.2 | No  |
| Test 40     | <i>P. tricornutum</i> Chromosome 11                                                               | 36.2 | No  |
| Pt25-1kb    | <i>P. tricornutum</i>                                                                             | 28   | Yes |
| Pt26-1kb    | <i>P. tricornutum</i>                                                                             | 32.2 | Yes |
| Pt25-10kb-6 | <i>P. tricornutum</i>                                                                             | 37.2 | No  |
| Pt25-10kb-9 | <i>P. tricornutum</i>                                                                             | 37.2 | No  |
| AM-1        | <i>A. macleodii</i> plasmid pAMDE1<br>(López-Pérez et al., 2013)                                  | 26.2 | Yes |
| AM -2       | <i>A. macleodii</i> plasmid pAMDE1<br>(López-Pérez et al., 2013)                                  | 28.8 | Yes |
| CF-1        | <i>C. fusiformis</i> plasmid pCF1<br>(Hildebrand et al., 1992)                                    | 28   | Yes |
| CF-2        | <i>C. fusiformis</i> plasmid pCF2<br>(Hildebrand et al., 1992)                                    | 27   | Yes |
| CenArsHis   | <i>S. cerevisiae</i> (amplified from <i>P. tricornutum</i> episome p0521s)<br>(Karas et al. 2015) | 26.8 | Yes |
| ArsHis      | <i>S. cerevisiae</i> (amplified from <i>P. tricornutum</i> episome p0521s)<br>(Karas et al. 2015) | 28.6 | Yes |

**Supplementary Table 6:** Identification of 6-mer sequences significantly enriched in *P. tricornutum* centromeres. P-values of statistical tests for each 6-mer for centromeres compared to randomly selected genomic sequences, and randomly generated sequences at 39% GC and 47% are shown.

|        | genomic     | random_39   | random_47   | significant_p<0.01 | significant_p<0.001 |
|--------|-------------|-------------|-------------|--------------------|---------------------|
| AAAAAA | 2.85E-06    | 4.80E-06    | 3.17E-06    | TRUE               | TRUE                |
| AAAAAC | 0.000292463 | 1.19E-05    | 2.85E-06    | TRUE               | TRUE                |
| AAAAAG | 9.78E-06    | 4.33E-06    | 2.56E-06    | TRUE               | TRUE                |
| AAAAAT | 2.56E-06    | 4.80E-06    | 2.56E-06    | TRUE               | TRUE                |
| AAAACA | 2.36E-05    | 0.00014772  | 4.33E-06    | TRUE               | TRUE                |
| AAAAGA | 5.90E-06    | 5.51E-05    | 4.80E-06    | TRUE               | TRUE                |
| AAAAGC | 0.000714299 | 4.80E-06    | 2.85E-06    | TRUE               | TRUE                |
| AAAATA | 6.04E-05    | 0.000479154 | 2.56E-06    | TRUE               | TRUE                |
| AAAATC | 3.15E-05    | 7.23E-06    | 2.56E-06    | TRUE               | TRUE                |
| AAAATG | 2.60E-05    | 5.90E-06    | 4.80E-06    | TRUE               | TRUE                |
| AAAATT | 2.85E-06    | 2.85E-06    | 2.56E-06    | TRUE               | TRUE                |
| AAACAA | 0.000191478 | 0.00014772  | 3.17E-06    | TRUE               | TRUE                |
| AAAGAA | 0.000113507 | 0.00014772  | 3.17E-06    | TRUE               | TRUE                |
| AAATCA | 2.15E-05    | 2.86E-05    | 3.51E-06    | TRUE               | TRUE                |
| AAATGA | 1.77E-05    | 0.000317895 | 5.51E-05    | TRUE               | TRUE                |
| AAATTT | 9.78E-06    | 2.86E-05    | 9.78E-06    | TRUE               | TRUE                |
| AACAAA | 0.000345387 | 9.78E-06    | 8.00E-06    | TRUE               | TRUE                |
| AAGAAA | 3.15E-05    | 4.80E-06    | 3.17E-06    | TRUE               | TRUE                |
| AAGAGA | 0.00037509  | 0.000441795 | 8.69E-05    | TRUE               | TRUE                |
| AATCAA | 0.000175692 | 2.15E-05    | 7.23E-06    | TRUE               | TRUE                |
| AATGAA | 3.17E-06    | 2.36E-05    | 7.23E-06    | TRUE               | TRUE                |
| AATTGA | 2.36E-05    | 0.000103872 | 2.56E-06    | TRUE               | TRUE                |
| AATTTG | 0.000660057 | 4.17E-05    | 2.85E-06    | TRUE               | TRUE                |
| ACAAAA | 5.51E-05    | 1.77E-05    | 2.85E-06    | TRUE               | TRUE                |
| AGAAAA | 7.23E-06    | 3.51E-06    | 3.51E-06    | TRUE               | TRUE                |
| AGAGAA | 5.51E-05    | 0.000175692 | 0.000161136 | TRUE               | TRUE                |
| AGCAAA | 0.000562874 | 3.46E-05    | 5.32E-06    | TRUE               | TRUE                |
| ATGAAA | 2.85E-06    | 5.03E-05    | 3.90E-06    | TRUE               | TRUE                |
| ATTGCA | 9.50E-05    | 0.000227131 | 7.25E-05    | TRUE               | TRUE                |
| ATTTCA | 3.51E-06    | 0.000191478 | 3.90E-06    | TRUE               | TRUE                |
| ATTTTC | 2.56E-06    | 2.56E-06    | 2.56E-06    | TRUE               | TRUE                |
| CAAAAA | 2.36E-05    | 1.32E-05    | 3.90E-06    | TRUE               | TRUE                |
| CAGAAA | 0.000714299 | 0.000441795 | 6.62E-05    | TRUE               | TRUE                |
| GAAAAA | 7.23E-06    | 2.56E-06    | 2.56E-06    | TRUE               | TRUE                |
| TAAAAA | 3.51E-06    | 3.15E-05    | 2.85E-06    | TRUE               | TRUE                |
| TCAAAA | 7.23E-06    | 8.85E-06    | 2.85E-06    | TRUE               | TRUE                |
| TCACAA | 0.000227131 | 6.04E-05    | 6.62E-05    | TRUE               | TRUE                |
| TGAAAA | 5.32E-06    | 2.56E-06    | 2.56E-06    | TRUE               | TRUE                |
| TGCAAA | 0.000660057 | 0.000292463 | 7.25E-05    | TRUE               | TRUE                |
| TTCAAA | 1.77E-05    | 1.95E-05    | 3.51E-06    | TRUE               | TRUE                |
| TTGAAA | 9.78E-06    | 2.56E-06    | 4.33E-06    | TRUE               | TRUE                |
| AAAACT | 7.94E-05    | 0.009171464 | 5.03E-05    | TRUE               | FALSE               |
| AAAAGT | 0.000479154 | 0.004169116 | 2.56E-06    | TRUE               | FALSE               |
| AAAGAG | 0.00316166  | 0.000135361 | 4.58E-05    | TRUE               | FALSE               |
| AAAGCA | 0.006653403 | 0.000147654 | 3.80E-05    | TRUE               | FALSE               |
| AAAGGA | 0.007100609 | 0.000609666 | 5.56E-05    | TRUE               | FALSE               |
| AAAGTC | 0.009766957 | 0.003390234 | 0.000171767 | TRUE               | FALSE               |
| AAATAT | 3.90E-06    | 0.007100609 | 2.56E-06    | TRUE               | FALSE               |
| AAATTC | 5.90E-06    | 0.003633756 | 8.00E-06    | TRUE               | FALSE               |
| AAATTG | 0.002215714 | 0.000407169 | 5.90E-06    | TRUE               | FALSE               |
| AAGCAA | 0.008076805 | 0.000123981 | 1.19E-05    | TRUE               | FALSE               |
| AATATA | 7.26E-06    | 0.000660057 | 0.006231683 | TRUE               | FALSE               |
| AATTTT | 0.000113507 | 0.001654206 | 5.32E-06    | TRUE               | FALSE               |
| ACACCC | 0.004530068 | 0.008702056 | 0.000395362 | TRUE               | FALSE               |
| ACCCGT | 3.76E-05    | 0.008146174 | 0.000635096 | TRUE               | FALSE               |
| ACGCGC | 6.90E-05    | 0.003599357 | 0.000575399 | TRUE               | FALSE               |
| ACGGGG | 0.000477369 | 0.00961308  | 0.000194074 | TRUE               | FALSE               |

|         |             |             |             |      |       |
|---------|-------------|-------------|-------------|------|-------|
| ACTTTC  | 0.001322531 | 0.003390234 | 7.94E-05    | TRUE | FALSE |
| AGAAAT  | 1.60E-05    | 0.001780757 | 6.53E-06    | TRUE | FALSE |
| AGCTCA  | 0.002456903 | 0.009766957 | 0.003073545 | TRUE | FALSE |
| AGGAAA  | 0.008076805 | 0.000519444 | 0.000519444 | TRUE | FALSE |
| AGGTTC  | 0.002103615 | 0.005863077 | 0.002029683 | TRUE | FALSE |
| ATCAAA  | 0.001780757 | 0.004775082 | 3.17E-06    | TRUE | FALSE |
| ATTGAC  | 0.002215714 | 0.007100609 | 7.94E-05    | TRUE | FALSE |
| ATTGTG  | 0.000345387 | 0.006231683 | 0.000479154 | TRUE | FALSE |
| ATTTGA  | 0.002947218 | 0.002381067 | 4.33E-06    | TRUE | FALSE |
| ATTTGC  | 0.009766957 | 0.00037509  | 0.000191478 | TRUE | FALSE |
| ATTTTG  | 0.007100609 | 3.80E-05    | 2.56E-06    | TRUE | FALSE |
| CATTC   | 0.000205838 | 0.008608592 | 0.001780757 | TRUE | FALSE |
| CCCAGG  | 0.008034429 | 0.008360654 | 0.004137208 | TRUE | FALSE |
| CCCCGA  | 0.004274734 | 0.008146174 | 0.000193945 | TRUE | FALSE |
| CCCGAC  | 7.26E-06    | 0.006308526 | 0.000918282 | TRUE | FALSE |
| CGGATA  | 0.002030638 | 0.000328058 | 0.00029359  | TRUE | FALSE |
| CGAAAA  | 0.008608592 | 6.62E-05    | 1.19E-05    | TRUE | FALSE |
| CGGGGA  | 0.0014711   | 0.005385665 | 6.64E-05    | TRUE | FALSE |
| CTAATA  | 0.008705089 | 0.000161136 | 0.005863077 | TRUE | FALSE |
| CTGAAA  | 0.002947218 | 0.001780757 | 0.00020859  | TRUE | FALSE |
| CTTTCA  | 0.001916154 | 0.002746128 | 0.001425575 | TRUE | FALSE |
| GA AAC  | 0.001780757 | 0.000191478 | 2.36E-05    | TRUE | FALSE |
| GA AATA | 1.95E-05    | 0.008076805 | 2.86E-05    | TRUE | FALSE |
| GA ATCA | 0.001654206 | 0.002746128 | 0.004462788 | TRUE | FALSE |
| GACCCC  | 0.000203778 | 0.003591822 | 0.000106416 | TRUE | FALSE |
| GAGAAA  | 0.001136755 | 3.46E-05    | 1.60E-05    | TRUE | FALSE |
| GGGACC  | 0.000477369 | 0.003301864 | 0.000203626 | TRUE | FALSE |
| GGGCAC  | 0.000162461 | 0.005158728 | 1.82E-05    | TRUE | FALSE |
| GGTCAC  | 0.008034429 | 0.006845526 | 0.002154938 | TRUE | FALSE |
| GGTTAA  | 0.008685211 | 0.000815736 | 0.003939076 | TRUE | FALSE |
| GTAAAA  | 0.000479154 | 0.00316166  | 2.60E-05    | TRUE | FALSE |
| GTGAAA  | 2.15E-05    | 0.001425575 | 1.45E-05    | TRUE | FALSE |
| TAAATA  | 3.90E-06    | 0.001322531 | 0.000175692 | TRUE | FALSE |
| TATAAA  | 3.41E-05    | 0.005834182 | 0.002215714 | TRUE | FALSE |
| TCCTAA  | 0.006631082 | 0.000441795 | 0.000960472 | TRUE | FALSE |
| TGAACA  | 0.001136755 | 0.003633756 | 0.006231683 | TRUE | FALSE |
| TGGAAA  | 0.003633756 | 7.94E-05    | 6.04E-05    | TRUE | FALSE |
| TGTAAA  | 0.001226398 | 0.008608592 | 4.17E-05    | TRUE | FALSE |
| TGTCAA  | 0.009171464 | 0.000407169 | 0.000268946 | TRUE | FALSE |
| TGTGAA  | 0.000519444 | 0.007100609 | 0.00024721  | TRUE | FALSE |
| TTGCAA  | 0.005459684 | 0.00014772  | 5.51E-05    | TRUE | FALSE |

**Supplementary Table 7:** Myco-No set has lower frequency of longer contiguous A+T windows (sized 1-12 nt) composed entirely of A+T bases relative to Myco-Yes and randomly generated sequences with 30% GC content. Windows advanced by 1 nt each step until it reached the end of the sequence. “Myco-No” set consisted of Myco-28-500-2, Myco-30-500-2, and Myco-30-700-2. “Myco-Yes” set consisted of Myco-28-500-1, Myco-28-700-1, Myco-28-700-2, Myco-28-1000-1, Myco-28-1000-2, Myco-30-500-1, Myco-30-700-1, Myco-30-1000-1, Myco-30-1000-2. The “random-30” set consisted of 29 randomly generated sequences of approximately 30% GC. Values are normalized to correct for size differences between the fragments.

|                     | Window Size (nucleotides) |       |       |       |       |       |       |       |       |       |       |       |
|---------------------|---------------------------|-------|-------|-------|-------|-------|-------|-------|-------|-------|-------|-------|
|                     | 1                         | 2     | 3     | 4     | 5     | 6     | 7     | 8     | 9     | 10    | 11    | 12    |
| <b>Myco-No-ave</b>  | 0.707                     | 0.480 | 0.310 | 0.203 | 0.122 | 0.072 | 0.049 | 0.034 | 0.022 | 0.016 | 0.010 | 0.006 |
| <b>Myco-Yes-ave</b> | 0.711                     | 0.500 | 0.346 | 0.248 | 0.170 | 0.118 | 0.085 | 0.060 | 0.043 | 0.031 | 0.022 | 0.016 |
| <b>Rand-30-ave</b>  | 0.687                     | 0.470 | 0.319 | 0.215 | 0.143 | 0.095 | 0.063 | 0.043 | 0.028 | 0.019 | 0.013 | 0.009 |

**Supplementary Table 8: Sequence of primers used in this study**

| Primer | Sequence                                                           | Use in Study                                                                       |
|--------|--------------------------------------------------------------------|------------------------------------------------------------------------------------|
| CF1-1  | CAGGAAACAGCTATGACCATGATTACGCCAAAGAATCCGGAA<br>AATTAGCCAAACCAGTCA   | Gibson assembly of <i>C. fusiformis</i> inserts to test diatom episome maintenance |
| CF1-2  | TATTTTGGAACTCACAAAAATAGATTCTTTGACTGGTTTGGCT<br>AATTTCCGGATTCTT     | Gibson assembly of <i>C. fusiformis</i> inserts to test diatom episome maintenance |
| CF1-3  | AAGAATCTATTTTGTGAGTTCCAAAAATAAATTTCAAGTCTT<br>TTTGTATTGAAGCAC      | Gibson assembly of <i>C. fusiformis</i> inserts to test diatom episome maintenance |
| CF1-4  | AAAATTGAACATAAGTACCTTTCCAATAAGGTGCTTCATAAAC<br>AAAAAGAACTTGAAATT   | Gibson assembly of <i>C. fusiformis</i> inserts to test diatom episome maintenance |
| CF1-5  | CTTATTGGAAAGGTACTTATGTTCAATTTTCGGGTGCAAGTGC<br>AACTTCTTTTACAGTC    | Gibson assembly of <i>C. fusiformis</i> inserts to test diatom episome maintenance |
| CF1-6  | ATTCCAATCAATTAACGTTTGTTTAACAAAGACTGTAAAAAGA<br>AGTTGCACCTGCACCCG   | Gibson assembly of <i>C. fusiformis</i> inserts to test diatom episome maintenance |
| CF1-7  | TTGTTAAACAAACGTTAATTGATTGGGAATTTTTTCTCCGCA<br>ATCTGGGTCGCTTTG      | Gibson assembly of <i>C. fusiformis</i> inserts to test diatom episome maintenance |
| CF1-8  | CAGTTTCTTTTTCTGTGATAATTCAAATCAAAGCGACCCAAG<br>ATTGCGGAAGAAAAAA     | Gibson assembly of <i>C. fusiformis</i> inserts to test diatom episome maintenance |
| CF1-9  | ATTTGAATTATGACAGAAAAAGAAAACTGACGATAAAATCT<br>CGGTTAGACAATTTTTAG    | Gibson assembly of <i>C. fusiformis</i> inserts to test diatom episome maintenance |
| CF1-10 | TTGTTTGCATCAGTTTTGTTGACAATTTCTAAAAATTGTCTA<br>ACCGAGATTTTATCGT     | Gibson assembly of <i>C. fusiformis</i> inserts to test diatom episome maintenance |
| CF1-11 | AAAATTGTCAAACAAAACCTGATGCAAACAAATAAAAAATTA<br>GTTTAGAGAAAAATTCAA   | Gibson assembly of <i>C. fusiformis</i> inserts to test diatom episome maintenance |
| CF1-12 | GGCGTGTCCGATTTTTAAAAATAAGACCTTTGAATTTTTCTCT<br>AACTAATGTTTTAT      | Gibson assembly of <i>C. fusiformis</i> inserts to test diatom episome maintenance |
| CF1-13 | AAGGTCTTATTTTTAAAAATCGGAACACGCCGAAGCAATAACTA<br>CTCTCGAGTCTATCAAG  | Gibson assembly of <i>C. fusiformis</i> inserts to test diatom episome maintenance |
| CF1-14 | TTTCATGCTCAAATTTAAAAAGTTTTTCTTGATAGACTCGA<br>GAGTAGTTATTGCTTC      | Gibson assembly of <i>C. fusiformis</i> inserts to test diatom episome maintenance |
| CF1-15 | GAAAAAATTTTTAAAAATTTGAGCATGAAATGAAAGGAAAAAT<br>TTATCAAAAAATTATCACA | Gibson assembly of <i>C. fusiformis</i> inserts to test diatom episome maintenance |
| CF1-16 | ATCTTCAAATTTATTTGTATTTAAAGAGTGTGATAATTTTTG<br>ATAAATTTTCTTTCA      | Gibson assembly of <i>C. fusiformis</i> inserts to test diatom episome maintenance |
| CF1-17 | CTCTTTAATACAAAATAATTTGAAGAATTCGAACATAAATT<br>ATCCATTCATTTTTTAA     | Gibson assembly of <i>C. fusiformis</i> inserts to test diatom episome maintenance |
| CF1-18 | AATGAAGAGGTAAGACCTTCCAAAATAAGTTAAAAAATGAA<br>TGGATAATTTATGTTCCA    | Gibson assembly of <i>C. fusiformis</i> inserts to test diatom episome maintenance |
| CF2-1  | CAGGAAACAGCTATGACCATGATTACGCCATAGTTCTTAAGCT<br>ACGGCCCATTCGGAAC    | Gibson assembly of <i>C. fusiformis</i> inserts to test diatom episome maintenance |
| CF2-2  | CGGAATTCAAAGCAGATTGAAGAAATGTTTGTTCGGAATGGG<br>CCGTAGCTTAAGAACTA    | Gibson assembly of <i>C. fusiformis</i> inserts to test diatom episome maintenance |
| CF2-3  | AAACATTTCTCAATCTGCTTTGAATCCGATTACATCAAATCA<br>GAAATATTAATGACTA     | Gibson assembly of <i>C. fusiformis</i> inserts to test diatom episome maintenance |
| CF2-4  | AAAATTGAAGAAGCATGACAAAACCTCTGTAGTCATTAATAT<br>TTCTGATTTGATGTAAT    | Gibson assembly of <i>C. fusiformis</i> inserts to test diatom episome maintenance |
| CF2-5  | CAAGAAGTTTGTGATGCTTCTTCAATTTTAACCTATGCTCAA<br>CATCTAGATTTTGA       | Gibson assembly of <i>C. fusiformis</i> inserts to test diatom episome maintenance |
| CF2-6  | GTCGATAAGGAACCTCACCTAAAGATTCAATTTCAAATCTAG<br>ATGTTGAGCATAAGTTA    | Gibson assembly of <i>C. fusiformis</i> inserts to test diatom episome maintenance |
| CF2-7  | TTGAATCTTTAGGTGGAGTTCCTTATCGACAAGTTACTTTTAA<br>GTACGAGATTTTTAG     | Gibson assembly of <i>C. fusiformis</i> inserts to test diatom episome maintenance |
| CF2-8  | TAGTAGATTTAATCGTAGGATTTTGAATTTCTAAAAAATCTCG<br>TACTTTAAAAGTAACTT   | Gibson assembly of <i>C. fusiformis</i> inserts to test diatom episome maintenance |
| CF2-9  | AATTTCAAATCCTACGATTAATCTACTAACCATTATCAATT<br>AGAGAAAATAAAAAAGT     | Gibson assembly of <i>C. fusiformis</i> inserts to test diatom episome maintenance |
| CF2-10 | GAAATACTCCAGTTGGAGTTGCTGAAGAACTTTTTATTTTC<br>TCTAATTGATAATGGT      | Gibson assembly of <i>C. fusiformis</i> inserts to test diatom episome maintenance |
| CF2-11 | TTCTTCAGCAACTCAAACCTGGAGTATTTCTAACTCATTTGAT<br>GACACTCATTTCAAT     | Gibson assembly of <i>C. fusiformis</i> inserts to test diatom episome maintenance |
| CF2-12 | CCAGTTGACTTGAGGTATAGCTACTAGAGATTGAAAATGAGT<br>GTCATCAAATGAAGTTA    | Gibson assembly of <i>C. fusiformis</i> inserts to test diatom episome maintenance |
| CF2-13 | CTCTAGTAGCTATACCTCAAGTCAAACCTGGAGAAATCTTCTAA<br>ACAGAAAATATTGGATAG | Gibson assembly of <i>C. fusiformis</i> inserts to test diatom episome maintenance |
| CF2-14 | AAAATAATTCATCAATTAACCAAACCTTGCTATCCAATATTTTC<br>TGTTTAGAAGATTTCT   | Gibson assembly of <i>C. fusiformis</i> inserts to test diatom episome maintenance |
| CF2-15 | CAAGAGTTTGGTTAATTGATGAATTTTTATTACAACCTATCTCT                       | Gibson assembly of <i>C. fusiformis</i> inserts to test diatom episome maintenance |

|                   |                                                                     |                                                                                       |
|-------------------|---------------------------------------------------------------------|---------------------------------------------------------------------------------------|
|                   | TTTTATTGCCCAATA                                                     | diatom episome maintenance                                                            |
| CF2-16            | ATTTATCTTTTGTAAGTTTGTGTTGAAAAATATTGGGCAAATAA<br>AAAGGATAGTTGTAAT    | Gibson assembly of <i>C. fusiformis</i> inserts to test diatom episome maintenance    |
| CF2-17            | TTTTTCAAACAAAACCTTACAAAAGATAAATTGGAAGTTCGATT<br>TAAATTTATCCAAGTTT   | Gibson assembly of <i>C. fusiformis</i> inserts to test diatom episome maintenance    |
| CF2-18            | AAAATACTTTTCAATATTACAGAAGTAAAACTTGGATAAA<br>TTAAATCGAACTTCCA        | Gibson assembly of <i>C. fusiformis</i> inserts to test diatom episome maintenance    |
| Puc-ShBle-F       | GCAGGTGCGACTCTAGAGGATCCCCAGGATTAGTGCAATTCGAG<br>TTG                 | Construction of plasmid pPtPBR1-YFP-CENP-A                                            |
| Puc-ShBle-R       | GTTGTAAAACGACGGCCAGTGTGAAGACGAGCTAGTGTATTCT<br>CT                   | Construction of plasmid pPtPBR1-YFP-CENP-A                                            |
| Puc-PromTerm-1    | CAATTTACACAGGAAAACAGCTATGACCATGATTACGCCAAGG<br>GCGAATTGGAGCTCC      | Construction of plasmid pPtPBR1-YFP-CENP-A                                            |
| Puc-PromTerm-2    | TTGTCCTCACTGAAAGTGTCCAGCCAAAGTCGAGGTAGACCG<br>GTGAAGGGGGCGGCC       | Construction of plasmid pPtPBR1-YFP-CENP-A                                            |
| Puc-PromTerm-3    | TACAAAAAAGCAGGCTCCGCGGCCGCCCTTACC GGCTACT<br>CTCGACTTTGGCTGGG       | Construction of plasmid pPtPBR1-YFP-CENP-A                                            |
| Puc-PromTerm-4    | AGTGATTCAACTCGAATTGCTAATCCTGGGGTTGAAGACGA<br>GCTAGTGTATTCTG         | Construction of plasmid pPtPBR1-YFP-CENP-A                                            |
| CENPA-YFP-3       | TGTACAAAAAAGCAGGCTCCGCGGCCGCCCTTACCATGGT<br>GAGCAAGGGCGAGGAG        | Construction of plasmid pPtPBR1-YFP-CENP-A                                            |
| CENPA-YFP-4       | TTGTTTGCTTGTGGCGAACCATAGCTCCACCTCCACCTCCCTTG<br>TACAGCTGCCATGC      | Construction of plasmid pPtPBR1-YFP-CENP-A                                            |
| CENPA-YFP-5       | CGGCATGGACGAGCTGTACAAGGGAGGTGGAGGTGGAGCTAt<br>GGTTCGCCACAAGCAAAC    | Construction of plasmid pPtPBR1-YFP-CENP-A                                            |
| CENPA-YFP-6       | TGTCCTCACTGAAAAGTGTCCAGCCAAAGTCGAGGTAGCTACT<br>CTGTGTTGCCACG        | Construction of plasmid pPtPBR1-YFP-CENP-A                                            |
| PtPBRYFP-CENPA-1  | TTTGGTTTACAGTCAGGAATAACACTAGCTCGTCTTCAAGGG<br>CGAATTGGAGCTCCACCCC   | Construction of plasmid pPtPBR1-YFP-CENP-A                                            |
| PtPBRYFP-CENPA-2  | AAATTATAATTATTTTATAGCACGTGATGTTGAAGACGAGCT<br>AGTGTATTCTG           | Construction of plasmid pPtPBR1-YFP-CENP-A                                            |
| PtPBRnanoluc5     | TCATGTTTGACAGCTTATCATCG                                             | Construction of plasmid pPtPBR1-YFP-CENP-A                                            |
| PtPBRrev          | TGAAGACGAGCTAGTGTATTCTG                                             | Construction of plasmid pPtPBR1-YFP-CENP-A                                            |
| PtPBRnanoluc4     | TGCCTGACTGCGTTAGCAA                                                 | Construction of plasmid pPtPBR1-YFP-CENP-A                                            |
| PtPBRfor          | ATCACGTGCTATAAAAAATAATTATAATTTA                                     | Construction of plasmid pPtPBR1-YFP-CENP-A                                            |
| Q-ARS-1           | GGGGATCGCCAACAATACT                                                 | Chip-qPCR primer for Chip-seq Verification                                            |
| Q-ARS-2           | CACAGGATTTTCGTGTGTGG                                                | Chip-qPCR primer for Chip-seq Verification                                            |
| Q-TETR-1          | ATATCGTCCATTCAGCAGC                                                 | Chip-qPCR primer for Chip-seq Verification                                            |
| Q-TETR-2          | AGTGGCTCCAAGTAGCGAAG                                                | Chip-qPCR primer for Chip-seq Verification                                            |
| Q-25HR-1          | CATTTAAAGTCCATGCCCAGA                                               | Chip-qPCR primer for Chip-seq Verification                                            |
| Q-25HR-2          | GCCGACAATTTTATGCGTAG                                                | Chip-qPCR primer for Chip-seq Verification                                            |
| Q-25-control-1    | GACAGTGAGGTTGTGCGAAA                                                | Chip-qPCR primer for Chip-seq Verification                                            |
| Q-25-control-2    | AGGGTATGCACTGGAACCTG                                                | Chip-qPCR primer for Chip-seq Verification                                            |
| PtPBR2-Illumina-F | GGGAAAGAGTGTAGATCTCGGTGGTCGCCGTATCATTGGTAGC<br>GAATCTAGAGTCGACCT    | Construction of <i>P. tricornutum</i> genomic library                                 |
| PtPBR2-Illumina-R | TCACATCACGATCTCGTATGCCGTCTTCTGCTTGGACCGTTATA<br>GTTACGTGAAGACGAG    | Construction of <i>P. tricornutum</i> genomic library                                 |
| CAHtest1          | CTTCAGAAGCGTGCTATCGA                                                | Construction of <i>P. tricornutum</i> genomic library                                 |
| InsertR           | CGACCGAGCGCAGCGAGTCAAGTGTGAGCGAGGAAGCGGAAGAG<br>ATGCCGTCAGGTCGACTCT | Construction of <i>P. tricornutum</i> genomic library                                 |
| KO-CAH-1          | GTTGCTCGCTATGCTCGGTTACACGGCTGCGGCGAGCCGATT<br>TATTCAACAAAAGCCACG    | Amplification of kanamycin resistance cassette from plasmid PACYC177                  |
| KO-CAH-2          | AGAAGAGCACATACCTCAGTCACTTATTACTAGCGCCAGT<br>GTTACAACCAATTAACC       | Amplification of kanamycin resistance cassette from plasmid PACYC177                  |
| F-screen:         | GCACAAATGGGCATCCTTGCTCT                                             | Screening of Plasmids Testing Episome Maintenance Sequences                           |
| Pt25-10-6-F       | CTCGTCTTACGTAACATAACGGTCTAAGCCTCATCCTGGC<br>ATATTTGAGCGTTTCGA       | Amplification of <i>P. tricornutum</i> DNA insert to test episome maintenance ability |
| Pt25-10-6-R       | TGCAGGTCGACTCTAGATTGCTACCTTAGGAGTAAGTTACTC<br>TCAGTCAGGTCAAACCC     | Amplification of <i>P. tricornutum</i> DNA insert to test episome maintenance ability |
| Pt25-10-9-F       | CTCGTCTTACGTAACATAACGGTCTAAGACCCCTTTGGTA<br>TCCAAGTCGTAAGTGA        | Amplification of <i>P. tricornutum</i> DNA insert to test episome maintenance ability |
| Pt25-10-9-R       | TGCAGGTCGACTCTAGATTGCTACCTTAGTTGAAGAGTAACC<br>CTTTGTTAGACCCAAGT     | Amplification of <i>P. tricornutum</i> DNA insert to test episome maintenance ability |
| Pt25-10-12-F      | CTCGTCTTACGTAACATAACGGTCTAAGTAAATCATACACT<br>ATTCCTACGGATAATG       | Amplification of <i>P. tricornutum</i> DNA insert to test episome maintenance ability |
| Pt25-10-12-R      | TGCAGGTCGACTCTAGATTGCTACCTTAGGCGAGTATAGTGG<br>CCATGATGCGCGACCAT     | Amplification of <i>P. tricornutum</i> DNA insert to test episome maintenance ability |

|                   |                                                                  |                                                                                                |
|-------------------|------------------------------------------------------------------|------------------------------------------------------------------------------------------------|
| 25-hr-1           | TAACTAGCTCGTCTTACGTAACATAACGGTCGCTGATAG<br>CTGTATAAACTGCAAAAG    | Amplification of <i>P. tricornutum</i> DNA insert to<br>test episome maintenance ability       |
| 25-hr-2           | AGCGGAAGAGATGCCTGCAGGTCGACTCTAGATTGCTACCTG<br>CACTCCCCACAACAATG  | Amplification of <i>P. tricornutum</i> DNA insert to<br>test episome maintenance ability       |
| 26-hr-1           | AATAACTAGCTCGTCTTACGTAACATAACGGTCCGGACC<br>GAGAGATACTCTCTTC      | Amplification of <i>P. tricornutum</i> DNA insert to<br>test episome maintenance ability       |
| 26-hr-2           | GCGGAAGAGATGCCTGCAGGTCGACTCTAGATTGCTACCTCT<br>AGGCTGCACACGAGACG  | Amplification of <i>P. tricornutum</i> DNA insert to<br>test episome maintenance ability       |
| Pt-Myco-15-500-1  | CTAGCTCGTCTTACGTAACATAACGGTCTAGTTTTATATTA<br>GTTTAGATATTAATTA    | Amplification of <i>M. mycooides</i> Syn 1.0 DNA<br>insert to test episome maintenance ability |
| Pt-Myco-15-500-2  | TGCCTGCAGGTCGACTCTAGATTGCTACCATTCAAATAAAAA<br>CATACTAGCTAGTTTAT  | Amplification of <i>M. mycooides</i> Syn 1.0 DNA<br>insert to test episome maintenance ability |
| Pt-Myco-15-500-3  | CTAGCTCGTCTTACGTAACATAACGGTCTTATAGATAGTTA<br>AAAACATAATGTATTAG   | Amplification of <i>M. mycooides</i> Syn 1.0 DNA<br>insert to test episome maintenance ability |
| Pt-Myco-15-500-4  | TGCCTGCAGGTCGACTCTAGATTGCTACCTATATAGTTTCTG<br>AATTAATATATTGATT   | Amplification of <i>M. mycooides</i> Syn 1.0 DNA<br>insert to test episome maintenance ability |
| Pt-Myco-21-500-1  | CTAGCTCGTCTTACGTAACATAACGGTCAGCAATTAAAAA<br>GACTGTTGATATTTTGA    | Amplification of <i>M. mycooides</i> Syn 1.0 DNA<br>insert to test episome maintenance ability |
| Pt-Myco-21-500-2  | TGCCTGCAGGTCGACTCTAGATTGCTACCTCAACCATTGAAA<br>ACACTACAAATTCATCA  | Amplification of <i>M. mycooides</i> Syn 1.0 DNA<br>insert to test episome maintenance ability |
| Pt-Myco-21-500-3  | CTAGCTCGTCTTACGTAACATAACGGTCTAATCATTAGAA<br>TGTTTTATTACTAAT      | Amplification of <i>M. mycooides</i> Syn 1.0 DNA<br>insert to test episome maintenance ability |
| Pt-Myco-21-500-4  | TGCCTGCAGGTCGACTCTAGATTGCTACCTGATTA AAAAGCA<br>CTAAAAGAAAATAGATG | Amplification of <i>M. mycooides</i> Syn 1.0 DNA<br>insert to test episome maintenance ability |
| Pt-Myco-30-500-1  | TAACTAGCTCGTCTTACGTAACATAACGGTCAAACATGG<br>TCTTGAAAATGAAGATT     | Amplification of <i>M. mycooides</i> Syn 1.0 DNA<br>insert to test episome maintenance ability |
| Pt-Myco-30-500-2  | AGAGATGCCTGCAGGTCGACTCTAGATTGCTACCTAATGCA<br>ATTGACGCTGCTGGAAT   | Amplification of <i>M. mycooides</i> Syn 1.0 DNA<br>insert to test episome maintenance ability |
| Pt-Myco-30-500-3  | TAACTAGCTCGTCTTACGTAACATAACGGTCTCGTCAAG<br>CAATAACAAGAGCTATT     | Amplification of <i>M. mycooides</i> Syn 1.0 DNA<br>insert to test episome maintenance ability |
| Pt-Myco-30-500-4  | AGAGATGCCTGCAGGTCGACTCTAGATTGCTACCTAATGA<br>ATATCTAATTCTTCAAT    | Amplification of <i>M. mycooides</i> Syn 1.0 DNA<br>insert to test episome maintenance ability |
| Pt-Myco-40-500-1  | AGGAATAACTAGCTCGTCTTACGTAACATAACGGTCTTC<br>TTCGGGGCGAAAATCT      | Amplification of <i>M. mycooides</i> Syn 1.0 DNA<br>insert to test episome maintenance ability |
| Pt-Myco -40-500-2 | AGCGGAAGAGATGCCTGCAGGTCGACTCTAGATTGCTACCT<br>GCGCATCATTGGATGAT   | Amplification of <i>M. mycooides</i> Syn 1.0 DNA<br>insert to test episome maintenance ability |
| Pt-Myco -40-500-3 | AACACTAGCTCGTCTTACGTAACATAACGGTCTAGATTCA<br>TAGATAGCACTACTGGC    | Amplification of <i>M. mycooides</i> Syn 1.0 DNA<br>insert to test episome maintenance ability |
| Pt-Myco-40-500-4  | GATGCCTGCAGGTCGACTCTAGATTGCTACCTAGTTAGTT<br>TCATTATCAAGCACGTG    | Amplification of <i>M. mycooides</i> Syn 1.0 DNA<br>insert to test episome maintenance ability |
| Pt-Myco-50-500-1  | GGAATAACTAGCTCGTCTTACGTAACATAACGGTCTGTT<br>AAATCTGTCTTCCCGA      | Amplification of <i>M. mycooides</i> Syn 1.0 DNA<br>insert to test episome maintenance ability |
| Pt-Myco-50-500-2  | AAGCGGAAGAGATGCCTGCAGGTCGACTCTAGATTGCTACCC<br>AGGACTCGAACCTGCGG  | Amplification of <i>M. mycooides</i> Syn 1.0 DNA<br>insert to test episome maintenance ability |
| Pt-Myco-50-500-3  | ACTAGCTCGTCTTACGTAACATAACGGTCTATATGAGTAAA<br>CTTGGCTGACAGTTAC    | Amplification of <i>M. mycooides</i> Syn 1.0 DNA<br>insert to test episome maintenance ability |
| Pt-Myco-50-500-4  | GAAGAGATGCCTGCAGGTCGACTCTAGATTGCTACCTAACAC<br>TGCGGCCAACTACTTC   | Amplification of <i>M. mycooides</i> Syn 1.0 DNA<br>insert to test episome maintenance ability |
| Pt-Myco-21-700-1  | CTAGCTCGTCTTACGTAACATAACGGTCAATAATCCATTCC<br>TTCATTTCCTTGATAT    | Amplification of <i>M. mycooides</i> Syn 1.0 DNA<br>insert to test episome maintenance ability |
| Pt-Myco-21-700-2  | AGGTCGACTCTAGATTGCTACCAATATAGCTATAGATAATTA<br>TTTAATTAGAATTGTAG  | Amplification of <i>M. mycooides</i> Syn 1.0 DNA<br>insert to test episome maintenance ability |
| Pt-Myco-21-700-3  | CTAGCTCGTCTTACGTAACATAACGGTCTGAGATTTAATATT<br>GCCATTTTTCAACTC    | Amplification of <i>M. mycooides</i> Syn 1.0 DNA<br>insert to test episome maintenance ability |
| Pt-Myco-21-700-4  | ATGCCTGCAGGTCGACTCTAGATTGCTACCTAACAACAATTC<br>ATAGCAAATTACACCGT  | Amplification of <i>M. mycooides</i> Syn 1.0 DNA<br>insert to test episome maintenance ability |
| Pt-Myco-28-500-1  | GCTCGTCTTACGTAACATAACGGTCCAGACTAGAAAAGTCT<br>GTCTTTTTAATTATTA    | Amplification of <i>M. mycooides</i> Syn 1.0 DNA<br>insert to test episome maintenance ability |
| Pt-Myco-28-500-2  | ATGCCTGCAGGTCGACTCTAGATTGCTACCATTTCACTAGCTT<br>CAACAGTTAGAGATGG  | Amplification of <i>M. mycooides</i> Syn 1.0 DNA<br>insert to test episome maintenance ability |
| Pt-Myco-28-500-3  | CACTAGCTCGTCTTACGTAACATAACGGTCAAATCCTTTTGC<br>TTCTTGAAACATTTGT   | Amplification of <i>M. mycooides</i> Syn 1.0 DNA<br>insert to test episome maintenance ability |
| Pt-Myco-28-500-4  | TGCCTGCAGGTCGACTCTAGATTGCTACCTAAAAATTAATC<br>GCTAAATGAATCATTTA   | Amplification of <i>M. mycooides</i> Syn 1.0 DNA<br>insert to test episome maintenance ability |
| Pt-Myco-28-700-1  | TAGCTCGTCTTACGTAACATAACGGTCAACAAGCTTTAGAA<br>TTGGCTAAAAACATAA    | Amplification of <i>M. mycooides</i> Syn 1.0 DNA<br>insert to test episome maintenance ability |
| Pt-Myco-28-700-2  | AAGAGATGCCTGCAGGTCGACTCTAGATTGCTACCGATTTAA<br>ATCGTCAAGTTGCCGAA  | Amplification of <i>M. mycooides</i> Syn 1.0 DNA<br>insert to test episome maintenance ability |



|                   |                                                                                   |                                                                                                |
|-------------------|-----------------------------------------------------------------------------------|------------------------------------------------------------------------------------------------|
| Pt-Myco-28-700-3  | CTCGTCTTACGTAACATAACGGTCCAAAATAATTACTGAA<br>ACTAGATGAGTTTATT                      | Amplification of <i>M. mycooides</i> Syn 1.0 DNA<br>insert to test episome maintenance ability |
| Pt-Myco-28-700-4  | ATGCCTGCAGGTCGACTCTAGATTTCGCTACCTCAGCTAGTAAT<br>TTTGCAAAAATACTTAC                 | Amplification of <i>M. mycooides</i> Syn 1.0 DNA<br>insert to test episome maintenance ability |
| Pt-Myco-28-1000-1 | AACACTAGCTCGTCTTACGTAACATAACGGTCTAACACCAC<br>ACATTGGTTCATATACA                    | Amplification of <i>M. mycooides</i> Syn 1.0 DNA<br>insert to test episome maintenance ability |
| Pt-Myco-28-1000-2 | CAGGTCGACTCTAGATTTCGCTACCATACTAAATATTCATACTC<br>ATTTATCTTAACTGCT                  | Amplification of <i>M. mycooides</i> Syn 1.0 DNA<br>insert to test episome maintenance ability |
| Pt-Myco-28-1000-3 | GGAATAACACTAGCTCGTCTTACGTAACATAACGGTCATTG<br>TTGAAATCAGAGGGGCT                    | Amplification of <i>M. mycooides</i> Syn 1.0 DNA<br>insert to test episome maintenance ability |
| Pt-Myco-28-1000-4 | GCAAGTCGACTCTAGATTTCGCTACCATAAATAAAAAAGTTATT<br>AGAATAAAAAATTTTAC                 | Amplification of <i>M. mycooides</i> Syn 1.0 DNA<br>insert to test episome maintenance ability |
| Pt-Myco-30-700-1  | TAGCTCGTCTTACGTAACATAACGGTCATGTACTGTCTTTTT<br>AAATCAGATGTCTAGC                    | Amplification of <i>M. mycooides</i> Syn 1.0 DNA<br>insert to test episome maintenance ability |
| Pt-Myco-30-700-2  | AGGTCGACTCTAGATTTCGCTACCATATAGTTTATTATTTTTTTA<br>ATAATCCTTAAGATTG                 | Amplification of <i>M. mycooides</i> Syn 1.0 DNA<br>insert to test episome maintenance ability |
| Pt-Myco-30-700-3  | ACTAGCTCGTCTTACGTAACATAACGGTCAACTTAGCAGCT<br>GAAACTAAGGCATTATC                    | Amplification of <i>M. mycooides</i> Syn 1.0 DNA<br>insert to test episome maintenance ability |
| Pt-Myco-30-700-4  | TGCCTGCAGGTCGACTCTAGATTTCGCTACCGAGCTGAGATAGT<br>GGAATTTCAAGAAAAAG                 | Amplification of <i>M. mycooides</i> Syn 1.0 DNA<br>insert to test episome maintenance ability |
| Pt-Myco-30-1000-1 | AGCTCGTCTTACGTAACATAACGGTCAAATTATTCAATTCTT<br>TCTACTCATTAAATG                     | Amplification of <i>M. mycooides</i> Syn 1.0 DNA<br>insert to test episome maintenance ability |
| Pt-Myco-30-1000-2 | GATGCTGCAGGTCGACTCTAGATTTCGCTACCAACAGGTGGAG<br>AAGTATTTGTAACAGAT                  | Amplification of <i>M. mycooides</i> Syn 1.0 DNA<br>insert to test episome maintenance ability |
| Pt-Myco-30-1000-3 | CTAGCTCGTCTTACGTAACATAACGGTCAGGTGGTAACAAT<br>ATATCATTATCAAAAAAC                   | Amplification of <i>M. mycooides</i> Syn 1.0 DNA<br>insert to test episome maintenance ability |
| Pt-Myco-30-1000-4 | TGCCTGCAGGTCGACTCTAGATTTCGCTACCTGCTTCATCTATTC<br>TTTGATTTAATAAAGC                 | Amplification of <i>M. mycooides</i> Syn 1.0 DNA<br>insert to test episome maintenance ability |
| U4-F1             | ACACTAGCTCGTCTTACGTAACATAACGGTCTTTAGCGAGT<br>TACTTTTTAATTTTGGAA                   | Amplification of <i>A. macleodii</i> pAMDE1 plasmid<br>DNA to test episome maintenance         |
| U4-R1             | TGCCTGCAGGTCGACTCTAGATTTCGCTACCTTATTAATAATCTC<br>AATAGCTATTATTGAA                 | Amplification of <i>A. macleodii</i> pAMDE1 plasmid<br>DNA to test episome maintenance         |
| U4-F2             | AATAACACTAGCTCGTCTTACGTAACATAACGGTCTGCCAA<br>TGTTAAGTAGTTTGCA                     | Amplification of <i>A. macleodii</i> pAMDE1 plasmid<br>DNA to test episome maintenance         |
| U4-R2             | GAAGAGATGCCTGCAGGTCGACTCTAGATTTCGCTACCGCAAGT<br>TCAAGTTGTTGTTCACT                 | Amplification of <i>A. macleodii</i> pAMDE1 plasmid<br>DNA to test episome maintenance         |
| CF1-F             | AGGAATAACACTAGCTCGTCTTACGTAACATAACGGTCAAG<br>AATCCGGAATAATAGCC                    | Amplification of synthesized <i>C. fusiformis</i> DNA<br>insert to test episome maintenance    |
| CF1-R             | TGCCTGCAGGTCGACTCTAGATTTCGCTACCAATGAAGAGGTAA<br>GACCTTCCAAAAATAAG                 | Amplification of synthesized <i>C. fusiformis</i> DNA<br>insert to test episome maintenance    |
| CF2-F             | AGGAATAACACTAGCTCGTCTTACGTAACATAACGGTCTAG<br>TTCTTAAGCTACGGCCC                    | Amplification of synthesized <i>C. fusiformis</i> DNA<br>insert to test episome maintenance    |
| CF2-R             | TGCCTGCAGGTCGACTCTAGATTTCGCTACCAAAATACTTTTTCA<br>ATATTTACAGAAGTAA                 | Amplification of synthesized <i>C. fusiformis</i> DNA<br>insert to test episome maintenance    |
| New1-F            | TTCACGTAACATAACGGTCAGCAAGAAGGCATGTTTGGGTTT<br>GTCAAAGG                            | Amplification of Inserts for Test plasmids                                                     |
| New1-R            | TCGACTCTAGATTTCGCTACCCATGAACCTGTAACATAAA<br>GAACATGATAATTTATCTATCCCGTGACAAACAGAAC | Amplification of Inserts for Test plasmids                                                     |
| New2-F            | TTCACGTAACATAACGGTCAGTTGAAATCTTCCAAAGCATC<br>ATCCATCCCTACGAATC                    | Amplification of Inserts for Test plasmids                                                     |
| New2-R            | TCGACTCTAGATTTCGCTACCGAATCCACTGCGACCCTATGATT<br>CTCCCATTC                         | Amplification of Inserts for Test plasmids                                                     |
| New3-F            | TTCACGTAACATAACGGTCAAGACGATTGGTGCTTTCTGTG<br>CTTTGGT                              | Amplification of Inserts for Test plasmids                                                     |
| New3-R            | TCGACTCTAGATTTCGCTACCTCGTGTGTGCCAGCATACTGGCT<br>GATA                              | Amplification of Inserts for Test plasmids                                                     |
| New4-F            | TTCACGTAACATAACGGTCACTCTCTTCATAGTGGCTATTCAA<br>AGCCTTACCAG                        | Amplification of Inserts for Test plasmids                                                     |
| New4-R            | TCGACTCTAGATTTCGCTACCATGGCCTACGTATCCACTACGGT<br>GAGATTAACAG                       | Amplification of Inserts for Test plasmids                                                     |
| New5-F            | TTCACGTAACATAACGGTCTGATCTTGGTGAAC TAGCGCATA<br>ATGGGCTTTTAGAATTG                  | Amplification of Inserts for Test plasmids                                                     |
| New5-R            | TCGACTCTAGATTTCGCTACCGTGTTCAAAAATTTTAGGGAAATC<br>GACCCGTATAAAAAACCAAGAGAGTT       | Amplification of Inserts for Test plasmids                                                     |
| New6-F            | TTCACGTAACATAACGGTCTGGCTGCGATATGTCCCGTCTTC<br>TTGT                                | Amplification of Inserts for Test plasmids                                                     |
| New6-R            | TCGACTCTAGATTTCGCTACCTAGTAGATGCATTGTCCTCCGAC<br>GACTCGC                           | Amplification of Inserts for Test plasmids                                                     |

|         |                                                                           |                                            |
|---------|---------------------------------------------------------------------------|--------------------------------------------|
| New7-F  | TTCACGTAACTATAACGGTCTGTTTTGCGGCTTCACGGTCAGTCATTGG                         | Amplification of Inserts for Test plasmids |
| New7-R  | TCGACTCTAGATTTCGCTACCTGGCACGCAACCAGTAGTCTGTCAAAC                          | Amplification of Inserts for Test plasmids |
| New8-F  | TTCACGTAACTATAACGGTCTTATGTGCGAAAAAGTCCGCAAATGCTTTTTGTTTTTCAGAAAAACATAGC   | Amplification of Inserts for Test plasmids |
| New8-R  | TCGACTCTAGATTTCGCTACCATTTTGGACTCCGATTTTCTTAACAAATATCGGTACCTCTGC           | Amplification of Inserts for Test plasmids |
| New9-F  | TTCACGTAACTATAACGGTCTGTACCAACGTCGCACGATAAAGCTTTCGAGC                      | Amplification of Inserts for Test plasmids |
| New9-R  | TCGACTCTAGATTTCGCTACCCGTTCCAGCTATGCACATGCTTCGC                            | Amplification of Inserts for Test plasmids |
| New10-F | TTCACGTAACTATAACGGTCATATTAGCACCATGCTTTTTGCACCACTGCCTAT                    | Amplification of Inserts for Test plasmids |
| New10-R | TCGACTCTAGATTTCGCTACCGATGAATGTCGAGGCGAGTGGCAGAG                           | Amplification of Inserts for Test plasmids |
| New11-F | TTCACGTAACTATAACGGTCTGGACTCCGTAGGCATAGCTCAC AAGATAGG                      | Amplification of Inserts for Test plasmids |
| New11-R | TCGACTCTAGATTTCGCTACCGTGTGAAGTATCTATGCTTTCATATTCTCGCGATGCC                | Amplification of Inserts for Test plasmids |
| New12-F | TTCACGTAACTATAACGGTCTTATCAGCCAGAAAATGCATTCCGACGACAATGGGAA                 | Amplification of Inserts for Test plasmids |
| New12-R | TCGACTCTAGATTTCGCTACCCATCTTCTCACTGCTGACGTGTTGTCCCA                        | Amplification of Inserts for Test plasmids |
| New13-F | TTCACGTAACTATAACGGTCTTATTTCACTATATTACTTACTTGGGTACAAAGCCCTATATTGCTTGGCATGA | Amplification of Inserts for Test plasmids |
| New13-R | TCGACTCTAGATTTCGCTACCTTCGTGAAACTGGTTGAAAGAGCGCCG                          | Amplification of Inserts for Test plasmids |
| New14-F | TTCACGTAACTATAACGGTCTTCTATCATCTTGCTTTTTGTATGGAGTATCCAAAATGTATATCCAAAGC    | Amplification of Inserts for Test plasmids |
| New14-R | TCGACTCTAGATTTCGCTACCCGTAACAGGCTGATTGCTACCATCATGATAAGTAAGTAACAACAAG       | Amplification of Inserts for Test plasmids |
| New15-F | TTCACGTAACTATAACGGTCTCTCAGCCGAAAGCACTGTTGAGAATACG                         | Amplification of Inserts for Test plasmids |
| New15-R | TCGACTCTAGATTTCGCTACCCAGCATAGAAAAGATTCATTCCAAATCTACCTATATTGTCGGAACGG      | Amplification of Inserts for Test plasmids |
| New16-F | TTCACGTAACTATAACGGTCTAGGGCGCGTGACGTGTCGAAATAG                             | Amplification of Inserts for Test plasmids |
| New16-R | TCGACTCTAGATTTCGCTACCGTTCGCCCGCATGGTCAAGGG                                | Amplification of Inserts for Test plasmids |
| New17-F | TTCACGTAACTATAACGGTCTGGGCTAAACCGTCTCGGGCG                                 | Amplification of Inserts for Test plasmids |
| New17-R | TCGACTCTAGATTTCGCTACCAGTATTGGTTTCTCTTTATTTT CAGTTAGCGTACAGCTTCACAG        | Amplification of Inserts for Test plasmids |
| New18-F | TTCACGTAACTATAACGGTCTATTTGCGCTTCCATGCAGCAGGATTCC                          | Amplification of Inserts for Test plasmids |
| New18-R | TCGACTCTAGATTTCGCTACCGGAAAAGGTGTCGTGGTATTCCCTAGAATCAACAATGCC              | Amplification of Inserts for Test plasmids |
| New19-F | AGTCAGGAATAACACTAGCTCGTCTCACGTAACTATAACGGTCGGTGCGCACGGGCCAG               | Amplification of Inserts for Test plasmids |
| New19-R | AGATGCCTGCAGGTCGACTCTAGATTTCGCTACCAGCACACCAGAAATCTACGCTGTCGGAA            | Amplification of Inserts for Test plasmids |
| New20-F | CGTAACTATAACGGTCCCGCGCGTTGGCTGAAACATAAGATTCCTAGCTTTGTTGG                  | Amplification of Inserts for Test plasmids |
| New20-R | TCGACTCTAGATTTCGCTACCTGAAGAGTAACCCAGTTGTTTTGATAGGCC                       | Amplification of Inserts for Test plasmids |
| New21-F | GCTCGTCTTCACGTAACTATAACGGTCATCGAAAAGCGTCAGCGAATCTTCGAAAAGAGG              | Amplification of Inserts for Test plasmids |
| New21-R | AGATGCCTGCAGGTCGACTCTAGATTTCGCTACCGTGTCTTTCTGGTAGCTTGGGACACC              | Amplification of Inserts for Test plasmids |
| New22-F | CTAGCTCGTCTTCACGTAACTATAACGGTCGAGCTACGTTATGACGCGACGAGGAAGGAT              | Amplification of Inserts for Test plasmids |
| New22-R | CAGTCTGACTCTAGATTTCGCTACCGAAGCTTGGCGAGTTGTCTGTAAATATCTGAGATACT            | Amplification of Inserts for Test plasmids |
| New23-F | TCGTCTTCACGTAACTATAACGGTCAATAATAACGGCCTTCACATCAGCGATTTGGTCCG              | Amplification of Inserts for Test plasmids |
| New23-R | TGCCTCAGGTCGACTCTAGATTTCGCTACCGCTACCCTCATCCGTTCAAGAATTGCA                 | Amplification of Inserts for Test plasmids |
| New24-F | ACTAGCTCGTCTTCACGTAACTATAACGGTCCATCGCTATGCA TGCGATTGCAAAGGATG             | Amplification of Inserts for Test plasmids |

|         |                                                                          |                                            |
|---------|--------------------------------------------------------------------------|--------------------------------------------|
| New24-R | GCAGGTCGACTCTAGATTCGCTACCTAAAAAAGGCGAACGC<br>AAGAACTTTTCGCTTCGC          | Amplification of Inserts for Test plasmids |
| New25-F | ACACTAGCTCGTCTTCACGTAACATAACGGTCCAAGAGCATT<br>AAACCAGGCTGGCTGGG          | Amplification of Inserts for Test plasmids |
| New25-R | ATGCCTGCAGGTCGACTCTAGATTCGCTACCGCCAGAGGTAAT<br>TCTACGAAACACCCCTG         | Amplification of Inserts for Test plasmids |
| New26-F | TTCACGTAACATAACGGTCTGACTGAGGATATTGTGTCTAC<br>TACTGACTGTGACTCA            | Amplification of Inserts for Test plasmids |
| New26-R | CAGGTCGACTCTAGATTCGCTACCGTTTTACACTTCTGGCCATC<br>TTCTCGGTTTATTGGG         | Amplification of Inserts for Test plasmids |
| New27-F | ACACTAGCTCGTCTTCACGTAACATAACGGTCTGCTCGAGGA<br>TATCAAGCAGCAGCTCG          | Amplification of Inserts for Test plasmids |
| New27-R | GGAAGAGATGCCTGCAGGTCGACTCTAGATTCGCTACCGGTCT<br>TGCAAGGGATCTCGCCG         | Amplification of Inserts for Test plasmids |
| New30-F | CTAGCTCGTCTTCACGTAACATAACGGTCAGAAAATCAACTA<br>TTTCGCTGTGAGCAGGGG         | Amplification of Inserts for Test plasmids |
| New30-R | GCAGGTCGACTCTAGATTCGCTACCTCTAACTCATTGATCTCCT<br>GCTTCGCTTCAAGAC          | Amplification of Inserts for Test plasmids |
| New31-F | AGCTCGTCTTCACGTAACATAACGGTCAAGGACTTGATATAT<br>TTCGACGCGACACCACG          | Amplification of Inserts for Test plasmids |
| New31-R | AGGTCGACTCTAGATTCGCTACCGAAGCTAATTATGTTAGACT<br>GAACACGTTATGCCCC          | Amplification of Inserts for Test plasmids |
| New32-F | CTAGCTCGTCTTCACGTAACATAACGGTCTGATTACCCACAC<br>AATTCTGACGTCCGAA           | Amplification of Inserts for Test plasmids |
| New32-R | TGCCTGCAGGTCGACTCTAGATTCGCTACCTCGGACGGGAAAT<br>ATATCCAACAGATCCTC         | Amplification of Inserts for Test plasmids |
| New33-F | TCGTCTTCACGTAACATAACGGTC<br>GAAAAACTTACCAGACATTGCTATCGTTATTGACC          | Amplification of Inserts for Test plasmids |
| New33-R | CCTGCAGGTCGACTCTAGATTCGCTACC<br>GACTTGGGCAAGTTACGTAATGTATGCCTG           | Amplification of Inserts for Test plasmids |
| New34-F | GCTCGTCTTCACGTAACATAACGGTC<br>GGGACAACAATGCTTGTACATTAGCTACGATA           | Amplification of Inserts for Test plasmids |
| New34-R | CCTGCAGGTCGACTCTAGATTCGCTACC<br>GCCCGAACAGATAATTGTAATTTCTCAATTGC         | Amplification of Inserts for Test plasmids |
| New35-F | CTCGTCTTCACGTAACATAACGGTCCCTCAAAGTTTTTTGAA<br>TTATGGGAGCTCTGAC           | Amplification of Inserts for Test plasmids |
| New35-R | ATGCCTGCAGGTCGACTCTAGATTCGCTACCATGCATCGATAA<br>AAATACACCTGAAATTTTGGATTAC | Amplification of Inserts for Test plasmids |
| New36-F | TCGTCTTCACGTAACATAACGGTCATAGCAGTGCAAGTTTTTT<br>AAATTTCAATTTAGAG          | Amplification of Inserts for Test plasmids |
| New36-R | GCAGGTCGACTCTAGATTCGCTACCGGCGAATAACAGGATTTG<br>AACCTGTGACTCTTAGA         | Amplification of Inserts for Test plasmids |
| New37-F | ACACTAGCTCGTCTTCACGTAACATAACGGTCTAATACGAG<br>CATTCTT                     | Amplification of Inserts for Test plasmids |
| New37-R | AGAGATGCCTGCAGGTCGACTCTAGATTCGCTACCCACAAGT<br>TACCTGT                    | Amplification of Inserts for Test plasmids |
| New38-F | ACACTAGCTCGTCTTCACGTAACATAACGGTCTCCGAATCT<br>CCGTTGATGGAAGCAGC           | Amplification of Inserts for Test plasmids |
| New38-R | AGAGATGCCTGCAGGTCGACTCTAGATTCGCTACCTTCTCAC<br>TCTCAACCATCCCGCA           | Amplification of Inserts for Test plasmids |
| New39-F | ACTAGCTCGTCTTCACGTAACATAACGGTCTTCGAGGATGAG<br>AAGCGTCGACGCAAAAAG         | Amplification of Inserts for Test plasmids |
| New39-R | CAGGTCGACTCTAGATTCGCTACCTTGTTAGGTAGATGAAGGA<br>CAGTCAATGAACCGAAA         | Amplification of Inserts for Test plasmids |
| New40-F | CTAGCTCGTCTTCACGTAACATAACGGTCACTCAATTTAGAT<br>GCCTTAACTGAGCCGG           | Amplification of Inserts for Test plasmids |
| New40-R | GCAGGTCGACTCTAGATTCGCTACCGTACAGTATGAGTACAA<br>CAAAACCGTCACCGTAG          | Amplification of Inserts for Test plasmids |

**Supplemental Table 9: Plasmid characteristics and assembly details:** Plasmids constructed to test maintenance ability of DNA sequences, including names of primers and template used to amplify insert plasmid sequences, the backbone vector used, the species the sequence originates from, and the sequence coordinates of the cloned insert. All plasmids were constructed using Gibson assembly.

| Name           | Insert primers                        | Insert Template                                     | Vector     | Insert Chromosomal Coordinates |
|----------------|---------------------------------------|-----------------------------------------------------|------------|--------------------------------|
| Myco-15-500-1  | Pt-Myco-15-500-1 + Pt-Myco-15-500-2   | Synthetic <i>M. mycoides</i> JCVI-syn1.0 (CP002027) | PtPBR2ceuI | 97701-98200                    |
| Myco-15-500-2  | Pt-Myco-15-500-3 + Pt-Myco-15-500-4   | Synthetic <i>M. mycoides</i> JCVI-syn1.0 (CP002027) | PtPBR2ceuI | 599701-600200                  |
| Myco-21-500-1  | Pt-Myco-21-500-1 + Pt-Myco-21-500-2   | Synthetic <i>M. mycoides</i> JCVI-syn1.0 (CP002027) | PtPBR2ceuI | 1301-1800                      |
| Myco-21-500-2  | Pt-Myco-21-500-3 + Pt-Myco-21-500-4   | Synthetic <i>M. mycoides</i> JCVI-syn1.0 (CP002027) | PtPBR2ceuI | 37201-37700                    |
| Myco-30-500-1  | Pt-Myco-30-500-1 + Pt-Myco-30-500-2   | Synthetic <i>M. mycoides</i> JCVI-syn1.0 (CP002027) | PtPBR2ceuI | 9901-10400                     |
| Myco-30-500-2  | Pt-Myco-30-500-3 + Pt-Myco-30-500-4   | Synthetic <i>M. mycoides</i> JCVI-syn1.0 (CP002027) | PtPBR2ceuI | 505901-506400                  |
| Myco-40-500-1  | Pt-Myco-40-500-1 + Pt-Myco-40-500-2   | Synthetic <i>M. mycoides</i> JCVI-syn1.0 (CP002027) | PtPBR2ceuI | 26101-26600                    |
| Myco-40-500-2  | Pt-Myco-40-500-3 + Pt-Myco-40-500-4   | Synthetic <i>M. mycoides</i> JCVI-syn1.0 (CP002027) | PtPBR2ceuI | 389601-390100                  |
| Myco-50-500-1  | Pt-Myco-50-500-1 + Pt-Myco-50-500-2   | Synthetic <i>M. mycoides</i> JCVI-syn1.0 (CP002027) | PtPBR2ceuI | 856901-857400                  |
| Myco-50-500-2  | Pt-Myco-50-500-3 + Pt-Myco-50-500-4   | Synthetic <i>M. mycoides</i> JCVI-syn1.0 (CP002027) | PtPBR2ceuI | 25401-25900                    |
| Myco-21-700-1  | Pt-Myco-21-700-1 + Pt-Myco-21-700-2   | Synthetic <i>M. mycoides</i> JCVI-syn1.0 (CP002027) | PtPBR2ceuI | 70251-70950                    |
| Myco-21-700-2  | Pt-Myco-21-700-3 + Pt-Myco-21-700-4   | Synthetic <i>M. mycoides</i> JCVI-syn1.0 (CP002027) | PtPBR2ceuI | 111351-112050                  |
| Myco-21-1000-1 | Pt-Myco-21-1000-1 + Pt-Myco-21-1000-2 | Synthetic <i>M. mycoides</i> JCVI-syn1.0 (CP002027) | PtPBR2ceuI | 37601-38600                    |
| Myco-21-1000-2 | Pt-Myco-21-1000-3 + Pt-Myco-21-1000-4 | Synthetic <i>M. mycoides</i> JCVI-syn1.0 (CP002027) | PtPBR2ceuI | 106951-107950                  |
| Myco-28-500-1  | Pt-Myco-28-500-1 + Pt-Myco-28-500-2   | Synthetic <i>M. mycoides</i> JCVI-syn1.0 (CP002027) | PtPBR2ceuI | 377101-377600                  |
| Myco-28-500-2  | Pt-Myco-28-500-3 + Pt-Myco-28-500-4   | Synthetic <i>M. mycoides</i> JCVI-syn1.0 (CP002027) | PtPBR2ceuI | 832801-833300                  |
| Myco-28-700-1  | Pt-Myco-28-700-1 + Pt-Myco-28-700-2   | Synthetic <i>M. mycoides</i> JCVI-syn1.0 (CP002027) | PtPBR2ceuI | 90301-91000                    |
| Myco-28-700-2  | Pt-Myco-28-700-3 + Pt-Myco-28-700-4   | Synthetic <i>M. mycoides</i> JCVI-syn1.0 (CP002027) | PtPBR2ceuI | 213501-214200                  |
| Myco-28-1000-1 | Pt-Myco-28-1000-1 + Pt-Myco-28-1000-2 | Synthetic <i>M. mycoides</i> JCVI-syn1.0 (CP002027) | PtPBR2ceuI | 62151-63150                    |
| Myco-28-1000-2 | Pt-Myco-28-1000-3 + Pt-Myco-28-1000-4 | Synthetic <i>M. mycoides</i> JCVI-syn1.0 (CP002027) | PtPBR2ceuI | 181751-182750                  |
| Myco-30-700-1  | Pt-Myco-30-700-1 + Pt-Myco-30-700-2   | Synthetic <i>M. mycoides</i> JCVI-syn1.0 (CP002027) | PtPBR2ceuI | 422351-423050                  |
| Myco-30-700-2  | Pt-Myco-30-700-3 + Pt-Myco-30-700-4   | Synthetic <i>M. mycoides</i> JCVI-syn1.0 (CP002027) | PtPBR2ceuI | 654101-654800                  |
| Myco-30-1000-1 | Pt-Myco-30-1000-1 + Pt-Myco-30-1000-2 | Synthetic <i>M. mycoides</i> JCVI-syn1.0 (CP002027) | PtPBR2ceuI | 280201-281200                  |

|                |                                           |                                                     |            |                      |
|----------------|-------------------------------------------|-----------------------------------------------------|------------|----------------------|
| Myco-30-1000-2 | Pt-Myco-30-1000-3 + Pt-Myco-30-1000-4     | Synthetic <i>M. mycoides</i> JCVI-syn1.0 (CP002027) | PtPBR2ceul | 678001-679000        |
| PtPBR-AM-1     | U4-F1 + U4-R1                             | <i>A. macleodii</i> plasmid pAMDE1(CP004850)        | PtPBR2ceul | pAMDE1 101201-101700 |
| PtPBR-AM -2    | U4-F2 + U4-R2                             | <i>A. macleodii</i> plasmid pAMDE1(CP004850)        | PtPBR2ceul | pAMDE1 294101-294600 |
| pUC19-CF-1     | Assembly from 18 oligos (CF1-1 to CF1-18) | <i>C. fusiformis</i> plasmid pCF1 (X64302)          | pUC19      | pCf1 931-1470        |
| pUC19-CF-2     | Assembly from 18 oligos (CF2-1 to CF2-18) | <i>C. fusiformis</i> plasmid pCF1 (X64302)          | pUC19      | pCF2 1431-1970       |
| PtPBR-CF-1     | PCR amplification with CF1-F+R primers    | <i>C. fusiformis</i> plasmid pCF1 (X64302)          | pUC19-CF-1 |                      |
| PtPBR-CF-2     | PCR amplification with CF2-F+R primers    | <i>C. fusiformis</i> plasmid pCF1 (X64302)          | pUC19-CF-2 |                      |
| Pt25-1kb       | 25-hr-1 + 25-hr-2                         | <i>P. tricornutum</i>                               | PtPBR2ceul | 56189-57353          |
| Pt26-1kb       | 26-hr-1 + 26-hr-2                         | <i>P. tricornutum</i>                               | PtPBR2ceul | 385427-386698        |
| Pt25-10kb-6    | Pt25-10-6-F+ Pt25-10-6-R                  | <i>P. tricornutum</i>                               | PtPBR2ceul | 25175-35168          |
| Pt25-10kb-9    | Pt25-10-9-F+ Pt25-10-9-R                  | <i>P. tricornutum</i>                               | PtPBR2ceul | 40154-50153          |
| Pt25-10kb-12   | Pt25-10-12-F+ Pt25-10-12-R                | <i>P. tricornutum</i>                               | PtPBR2ceul | 55109-65108          |
